# Supplementary material
Source: Elsevier journal article supplement (https://www.sciencedirect.com/science/article/pii/S2530064421000213)
Supplement: mmc1 [file S2530064421000213:mmc1.doc]

**Appendix 1.** Description of the creation of the datasets of mammal assemblages and the diet composition of the mammal species.

**1. Assemblages dataset**

We performed a literature search between 2015-2017 in Web of Science and Google Scholar for inventories of medium- and large-sized mammals of the Atlantic Forest, using different combinations of the following keywords: mammal(s), inventory, survey and Atlantic Forest; we search for the words in the title and abstract of the studies. We also did a Google search with the same keywords in English and Portuguese. We selected studies published in indexed and non-indexed journals, and also in gray literature such as theses, dissertations, monographs and abstracts of scientific events, aiming to maximize the number of studies in the dataset. Studies used in the dataset created by Magioli et al. (2015) were also incorporated.

We selected only studies that used the following methods: i) active search, which consists in searching for direct and indirect evidence of mammalian presence (including line transects); ii) camera trapping; and iii) sand plots; interviews data were considered only when used in a complementary way to the aforementioned methods. We have included only studies that presented GPS coordinates, the patch size, and the complete species list; all GPS locations were checked using Google Earth Pro.

Later, we selected studies that presented assemblages the most complete as possible, consistent with the patch size of the study area (information extracted from the studies). Sampling methods can be selective on species recorded, especially if a single method is used, independently of the sampling effort, resulting in subsampled assemblages that may compromise posterior analyzes. For more precision, we also calculated the patch size of each study site in a 2-km buffer (see *Landscape variables* in Materials and Methods) using the center of the forest remnants as reference for buffer creation. This approach permitted us to verify if the studied remnants (especially small remnants) were connected to other areas or inserted in forest continuums, factors that may alter the relationship between species richness and patch size. Thus, we removed sites with large differences between the patch size reported in the studies and the patch size calculated in the buffers.

Under these criteria, we selected 63 studies of medium- and large-sized mammals within the Atlantic Forest with different defaunation levels, resulting in 96 assemblages for analysis (Figure S1 and Appendix 2 – Table S1). The selected assemblages are located in forest remnants of several sizes (min = 1 ha, avg = 3900 ha, max = 85000 ha) representing the main gradients [latitude (min = 8°42′26″ S, max = 30°16′04″ S), longitude (min = 35°50′27″ W, max = 57°30′02″ W), elevation (from sea level to 1800 m)] and biogeographic regions of the Atlantic Forest (Araucária, Bahia, Interior, Pernambuco and Serra do Mar) (Silva and Casteleti, 2003). We considered as medium- and large-sized mammals, those weighing more than 1 kg (Chiarello, 2000) but we also included small-sized species that are commonly recorded in inventories and surveys (e.g., *Guerlinguetus* *brasiliensis*, *Leontopithecus* spp. and *Cavia* spp.; see Magioli et al., 2015). The species composition of each assemblages can be observed in Appendix 2 – Table S2.


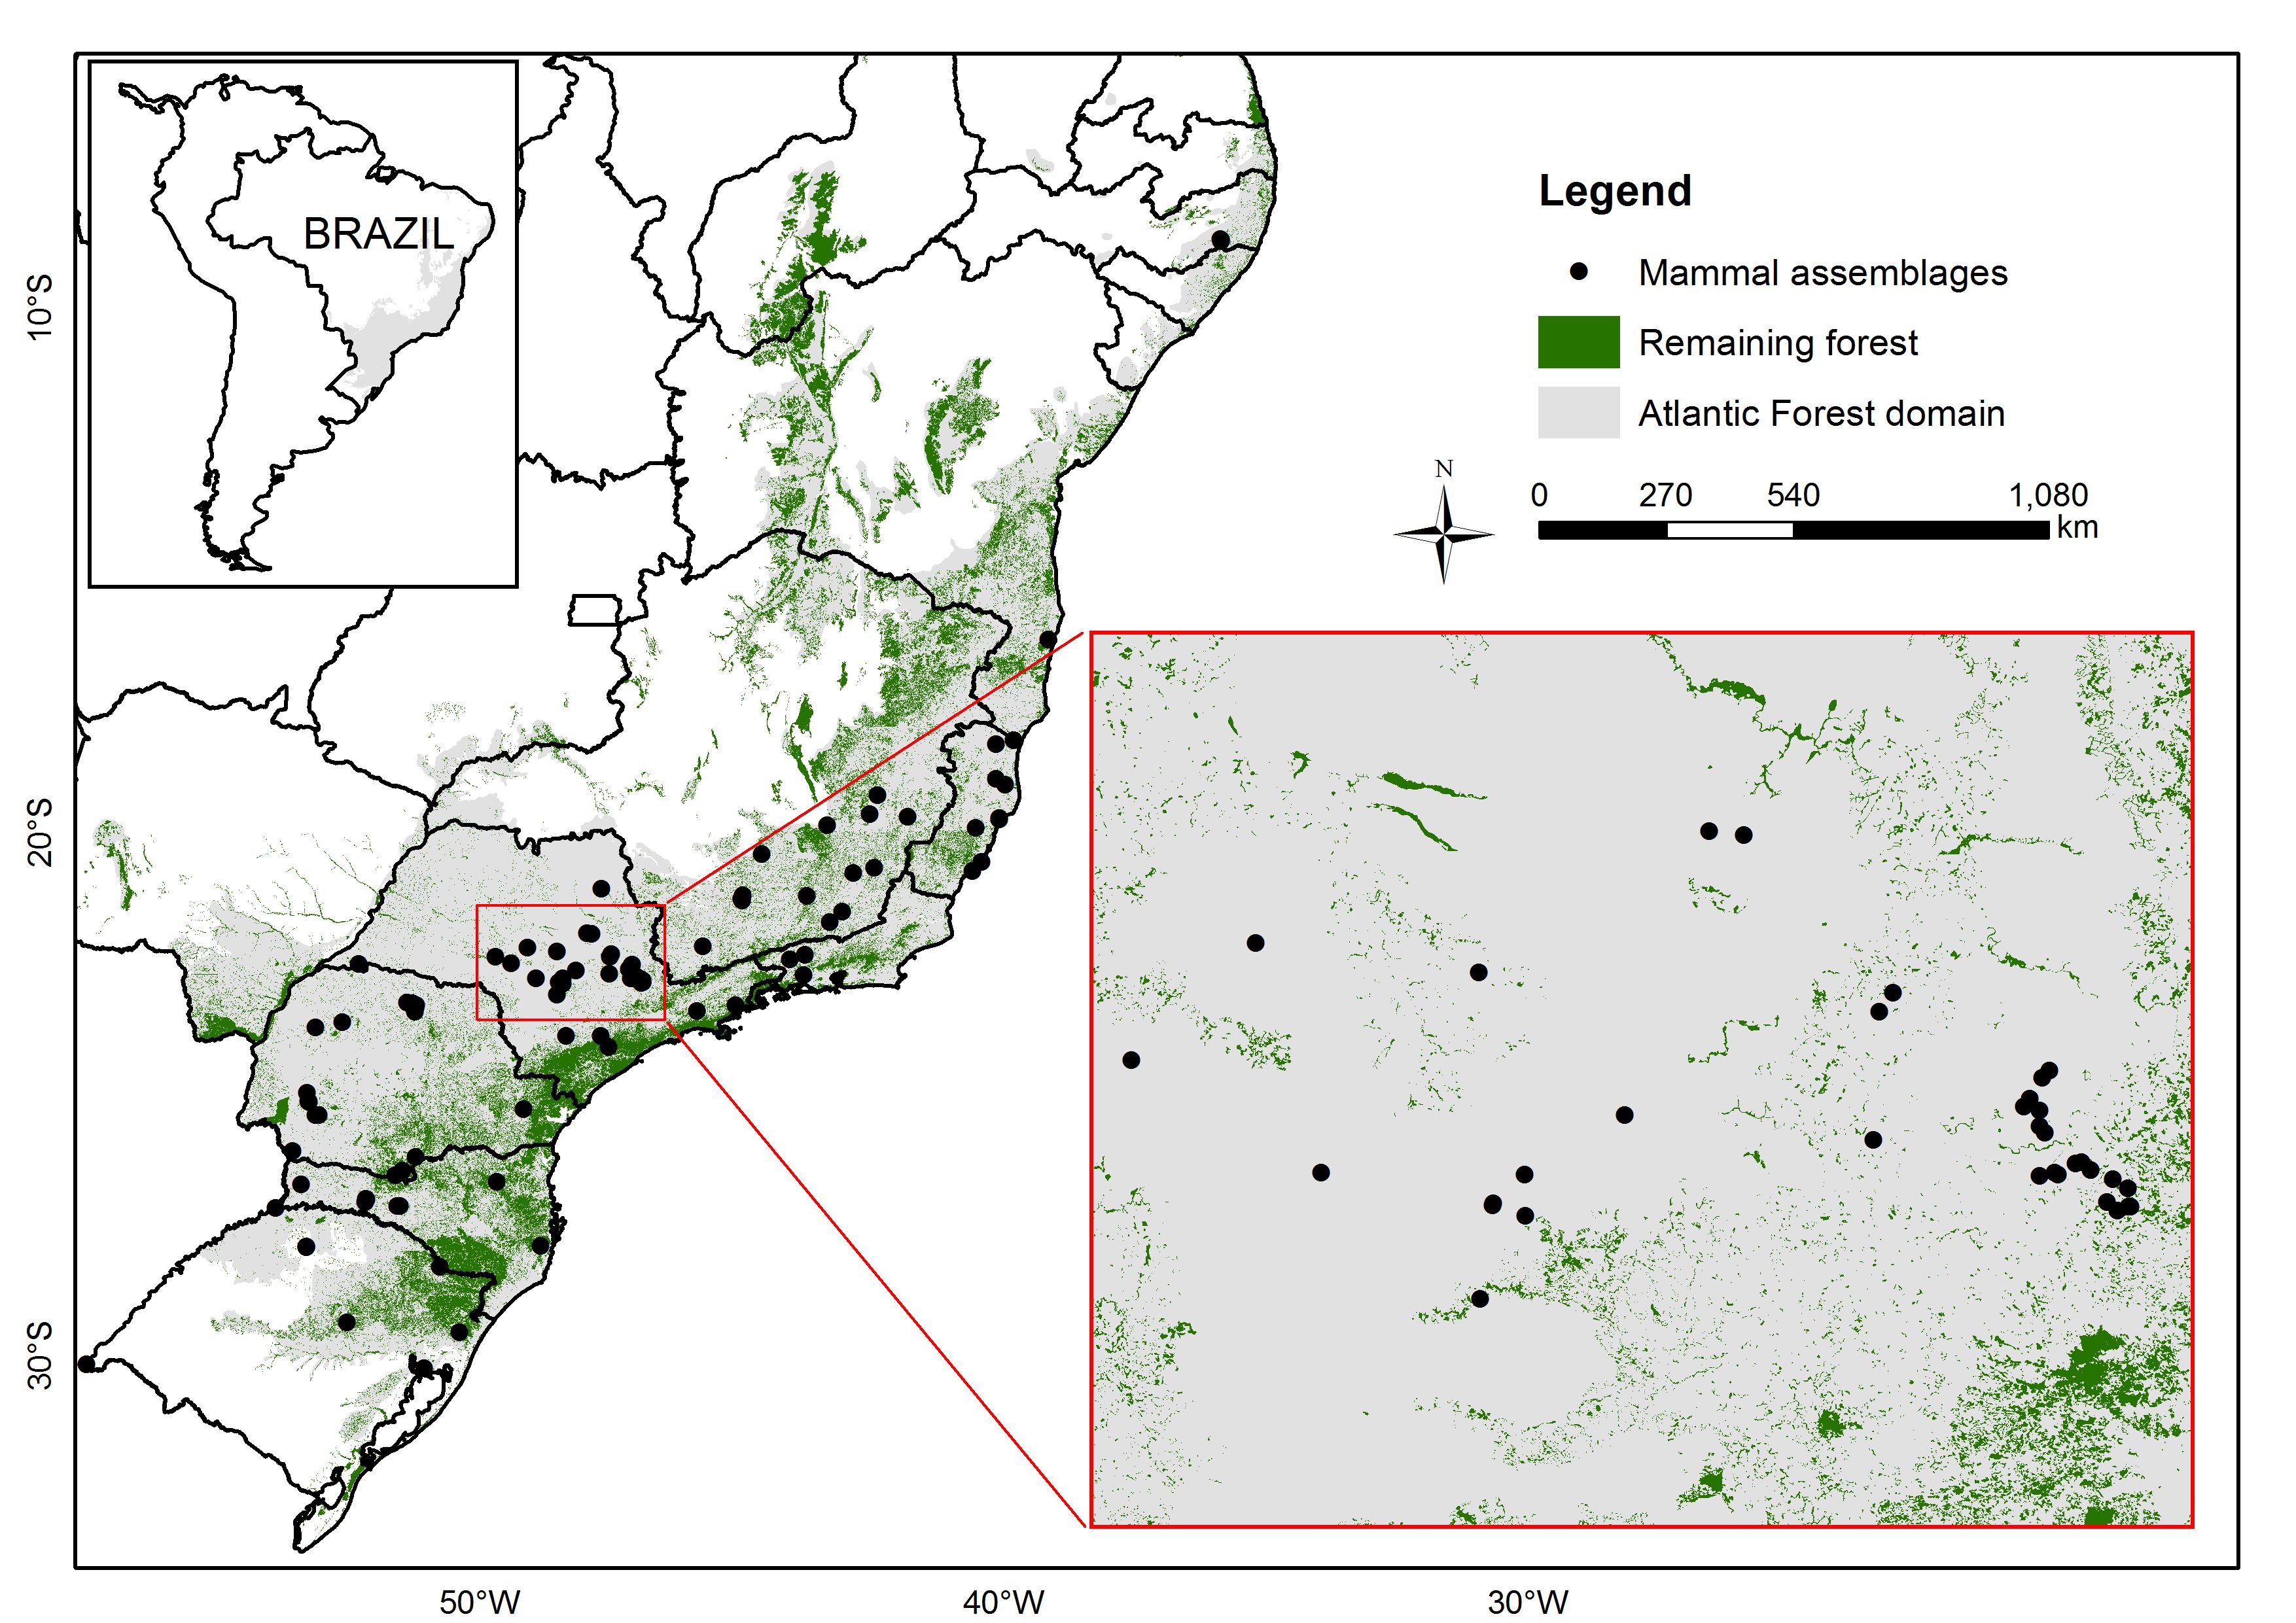


**Figure S1.** Location of the 96 assemblages of medium- and large-sized mammals in the Atlantic Forest, Brazil.

**2. Diet dataset**

To determine the contribution of mammals in performing each function, we created a dataset of feeding habits for all medium- and large-sized mammals of the Atlantic Forest. First, we updated the list created by Magioli et al. (2015, 2016) using our own assemblage dataset (Table S1 and S2), and accounting for changes in species nomenclature (Paglia et al. 2012; Trigo et al., 2013; Patton et al., 2015), totaling 83 species.

In 2017, for each species, we performed an extensive literature search in Web of Science and Google Scholar on feeding habit studies for all mammal species selected, using as keywords the species scientific name (e.g., *Cerdocyon thous*) + diet OR feeding [+ habit(s) OR preference(s)]. We also did a Google search with the same keywords in English and Portuguese. We selected studies published in indexed and non-indexed journals, information available on IUCN (2020), ICMBio/MMA Extinction Risk Assessments for the Brazilian Fauna, and also in gray literature such as theses, dissertations, monographs, and abstracts of scientific events, aiming to obtain the maximum number of references on each species. We also searched for other references within the literature cited of the analyzed studies.

We adopted the following criterion in order of importance to select the studies: (i) if the study was conducted in the Atlantic Forest; (ii) if the study was conducted in other Brazilian biomes for species without data in the Atlantic Forest; (iii) if the study was conducted in other countries for species without data for Brazil, giving preference to forest biomes. We included studies that used methods such as fecal samples analysis, stomach content, carcass analysis, direct observation (especially for primates) and ethnobiology in some cases. Based on these criteria, we selected 454 studies for all mammal species. Then, from these studies we extracted the relative percentage (0-100%) of food items composing the species diet, corresponding to the ecological functions selected for analysis (see Table 1 in Materials and Methods), and used this percentage as a proxy of their contribution to each function. For studies that presented feeding habits as absolute percentages, we recalculated the data to obtain relative values. The diet dataset present mean values and standard deviation for each of ecological function performed by the mammal species (Appendix 2 – Table S3). We classified as sensitive species, those that are negatively affected by habitat loss and modification and if threatened (ICMBio/MMA, 2018; IUCN, 2020), and as resilient species those tolerant of open habitats and anthropogenic areas (Appendix 2 – Table S3). Information on species mean body mass and locomotor habit were also included (Paglia et al., 2012).

**References**

Chiarello, A. 2000. Density and population size of mammals in remnants of Brazilian Atlantic Forest. Conserv. Biol. 14, 1649–1657.

IUCN – International Union for Conservation of Nature and Natural Resources. (2020). The IUCN Red List of Threatened Species. Version 2020–1. [http://www.iucnredlist.org](http://www.iucnredlist.org/).

Magioli, M., Ferraz, K.M.P.M.B., Setz, E.Z.F., Percequillo, A.R., Rondon, M.V.S., Kuhnen, V.V., Canhoto, M.C.S., Santos, K.E.A., Kanda, C.K., Fregonezi, G.L., Prado, H.A., Ferreira, M.K., Ribeiro, M.C., Villela, P.M.S., Coutinho, L.L., Rodrigues, M.G. 2016. Connectivity maintain mammal assemblages functional diversity within agricultural and fragmented landscapes. Eur. J. Wildl. Res. 62, 431-446.

Magioli, M., Ribeiro, M.C., Ferraz, K.M.P.M.B., Rodrigues, M.G. 2015. Thresholds in the relationship between functional diversity and patch size for mammals in the Brazilian Atlantic Forest. Anim. Conserv. 18, 499–511.

ICMBio/MMA. (2018). Livro Vermelho da Fauna Brasileira Ameaçada de Extinção: Volume II – Mamíferos. Brasília: ICMBio/MMA.

Paglia, A.P., Fonseca, G.A.B., Rylands, A.B., Hermann, G., Aguiar, L.M.S., Chiarello, A.G., Leite, Y.L.R., Costa, L.P., Siciliano, S., Kierulff, M.C.M., Mendes, S.L., Tavares, V.C., Mittermeier, R.A., Patton, J.L. 2012. Annotated Checklist of Brazilian Mammals. 2nd ed. Occasional Papers in Conservation Biology, 6. Arlington: Conservation International.

Patton, J.L., Pardiñas, U.F.J., D’Elía, G. 2015. Mammals of South America, v. 2, Rodents. University of Chicago Press, Chicago.

Silva J.M.C., Casteleti, C.H.M. 2003. Status of the biodiversity of the Atlantic Forest of Brazil, in: Galindo-Leal, C., Câmara, I.G. (Eds.), The Atlantic Forest of South America: biodiversity status, trends, and outlook. Center for Applied Biodiversity Science, Island Press, Washington, pp. 43–59.

Trigo, T.C., Schneider, A., Oliveira, T.G., Lehugeur, L.M., Silveira, L., Freitas, T.R., Eizirik, E. 2013. Molecular data reveal complex hybridization of a cryptic species of Neotropical wild cat. Curr. Biol. 23, 2528-2533.
