# Supplementary material
Source: Elsevier journal article supplement (https://www.sciencedirect.com/science/article/pii/S2530064421000213)
Supplement: mmc2 [file S2530064421000213:mmc2.xlsx]

## Sheet: Table S1
Table S1. Assemblages dataset. Assemblages of medium- and large-sized mammals of the Atlantic Forest, Brazil, used for analysis, including the selected studies, geographic coordinates (in decimal degrees), biogeographic regions, number of forest remnants in each study (N), the patch size extracted from the studies and the patch size calculated in buffers of 2 km radius of each area (in ha), sampl…
Study	Latitude	Longitude	Region	N	Area (study)	Area (buffer)	Methods	Richness
Almeida et al. (2010)	-22.2344	-49.0839	Interior	1	288	288	A	15
Alves et al. (2012)	-22.8179	-48.4077	Interior	1	1152	671.23	A	17
Antunes and Eston (2009)	-22.6681	-48.1553	Interior	1	1451	1068.82	A	19
Barros et al. (2007) and Neto et al. (2009)	-21.7435	-43.3123	Interior	1	647	626	A; CT	22
Begotti (2008)	-22.4077	-47.5144	Interior	Several	-	273.62	A; CT	19
Briani et al. (2001)	-22.3594	-47.4789	Interior	1	230	133	A	15
Brocardo and Cândido Jr. (2012)	-25.0001	-53.2926	Interior	3	135	367.69	A; CT	22
	-25.1623	-53.2712			405	509.71	A; CT	31
	-25.18	-53.2542			520	659.42	A; CT	29
Brocardo et al. (2012)	-24.1333	-47.5333	Serra do Mar	1	37644	1247.71	A; CT	36
Carvalho (2009)	-23.1301	-48.5194	Interior	1	25.7	247.8	A; S; CT	18
Castilho (2010)	-22.8069	-46.9817	Interior	9	1	1	A; S	3
	-22.8869	-46.9403			3	3	A; S	3
	-22.7869	-47.0047			5	5	A; S	3
	-22.79	-47.0189			5	5	A; S	4
	-22.9078	-46.9142			8	8	A; S	3
	-22.8978	-46.8828			9	9	A; S	4
	-22.8981	-46.8858			10	10	A; S	5
	-22.8981	-46.8817			10	10	A; S	6
	-22.8525	-46.8875			12	12	A; S	6
Cherem et al. (2011)	-27.9207	-48.8301	Serra do Mar	1	85000	1192.72	A; S; CT	33
Chiarello (1999)	-18.2681	-39.8039	Bahia	6	210	158.37	A	21
	-19.7881	-40.0756			260	136.45	A	22
	-19.0111	-40.1406			1504	977.88	A	27
	-18.3444	-40.1469			2400	977.88	A	28
	-19.1194	-39.9625			21800	979.65	A	34
	-19.7589	-40.0767			24250	1082.65	A	34
Chiarello (2000)	-21.1089	-47.6678	Interior	1	150	210	A	20
Dias et al. (2012)	-25.3198	-49.1571	Interior	1	100	164.87	A	17
Dias and Mikich (2006)	-21.9525	-47.9431	Araucaria	1	301	260	A	18
Duprat and Andriolo (2011)	-21.5388	-43.0772	Interior	1	600	493.76	A; S	21
Eduardo and Passamani (2009)	-22.2047	-45.7386	Interior	1	300	289.77	A; S; CT	15
Falcão et al. (2012)	-16.3503	-39.1444	Bahia	1	6069	1203.78	A; CT	30
Faria (2006)	-22.5466	-52.3034	Interior	1	33845	1267.4	A; S; CT	32
Galego et al. (2014)	-21.2412	-43.7517	Interior	1	467.16	258.53	S; CT	14
Gaspar (2005)	-22.8294	-46.9264	Interior	1	230	215.82	A; S; CT	23
Haddad (2008)	-22.5288	-49.3974	Interior	Several	402.17	319.67	A; S	23
IAP (2002a)	-23.4537	-51.2339	Araucaria	1	690	540.26	A	21
IAP (2002b)	-25.4333	-53.1333	Araucaria	1	2235	1220.05	A	30
Kasper et al. (2007)	-27.2006	-53.8947	Interior	1	17491	1221.01	A; CT	32
Keesen et al. (2016)	-19.678	-42.5473	Interior	1	35976	1231.49	CT	37
Kionka (2013)	-27.9415	-53.3033	Araucaria	3	5	5	A; CT	5
	-27.9472	-53.3022			5	5	A; CT	4
	-27.9453	-53.3084			10	10	A; CT	7
Lopes et al. (2009)	-23.3773	-51.2193	Interior	1	2.2	33.12	A; CT	15
Maciel and Maciel (2015)	-26.226	-51.2232	Interior	1	133	133	A	12
Magioli et al. (2016)	-22.6458	-47.1497	Interior	8	44.9	60	A	15
	-22.7125	-47.0972			204.64	204.64	A	27
	-22.5733	-47.1036			59.5	59.5	A	21
	-22.6953	-47.1106			45.56	45.56	A	15
	-22.5558	-47.0861			73.08	73.08	A	17
	-22.6556	-47.1103			64.68	64.68	A	14
	-22.6267	-47.135			164.25	180	A	24
	-22.8203	-47.1103			234.13	234.13	A	25
Martins et al. (2016)	-23.6525	-52.6173	Interior	1	312	260.7	A; S; CT	18
Mascarello (2012)	-27.1638	-51.5226	Interior	1	30	51.47	A; S	10
Nunes et al. (2013) and Oliveira et al. (2013)	-20.7055	-42.4695	Interior	1	13210	1095.68	A; S; CT	21
Oliveira (2002)	-23.438	-45.8535	Interior	1	126	171.85	A; S	13
Onghero Jr. et al. (2012)	-26.4919	-51.4639	Araucaria	1	204	204	A; S; CT	13
Padilha (2011)	-27.1662	-51.5737	Araucaria	1	300	292.64	A; S	19
Paglia et al. (2005)	-19.8992	-43.3686	Interior	1	605	468.83	A	21
Paschoal (2008)	-19.7273	-41.8216	Interior	1	957	814.04	A; CT	19
Passamani et al. (2000) and Srbek-Araujo and Chiarello (2008)	-19.95	-40.5333	Bahia	1	800	1021.42	A; CT	36
Passamani et al. (2005)	-20.775	-40.5917	Bahia	1	390	256.46	A	12
Penido and Zanzini (2012)	-20.4464	-44.6106	Interior	1	1563	869.47	A; S; CT	21
Pereira et al. (2013)	-22.4594	-44.081	Interior	1	211	265.69	A	25
Pires and Cadermatori (2012)	-30.2678	-51.0564	Interior	1	142	406.56	A; S	17
Prado et al. (2008)	-20.8014	-42.8583	Interior	1	384.5	412.43	S; CT	19
Reale et al. (2014)	-22.308	-48.5234	Interior	1	190	190	A; S; CT	26
Rocha-Mendes et al. (2015)	-23.329	-45.1121	Serra do mar	1	17000	930.6	A; CT	32
Rosário et al. (2009)	-19.3213	-42.4008	Interior	1	5.44	5.44	A	7
Rossaneis (2014)	-23.3294	-51.207	Araucaria	4	10.4	10.4	A; S	7
	-23.3249	-51.2987			6	6	A; S	8
	-23.2988	-51.2805			5.4	5.4	A; S	8
	-23.2851	-51.3872			15	15	A; S	8
Saciloto (2009)	-22.7308	-47.5282	Interior	Several	-	77.62	A	15
Santos (2009)	-22.8952	-48.4874	Interior	2	20	20	A; S	15
	-22.8901	-48.4866			34.6	34.6	A; S	10
Santos et al. (2016)	-21.3308	-44.9882	Interior	1	235	186.07	A; S; CT	19
Silva and Passamani (2009)	-21.2913	-44.9872	Interior	5	7.2	7.2	S; CT	10
	-21.2958	-44.9943			11.8	11.8	S; CT	11
	-21.2972	-44.9867			1.03	1.03	S; CT	5
	-21.3027	-44.9963			7.6	7.6	S; CT	8
	-21.3035	-44.987			7.8	7.8	S; CT	8
Silva et al. (2009)	-21.2298	-44.9793	Interior	Several	300	50	A; S	13
Silva Jr. and Pontes (2008)	-8.73778	-35.8425	Pernambuco	4	10	622.01	A	5
	-8.70722	-35.8586			50	927.74	A	12
	-8.71778	-35.8408			300	712.19	A	9
	-8.72	-35.8444			500	869.37	A	15
Siviero and Setz (2011)	-22.8183	-47.0647	Interior	2	11.4	11.4	A	6
	-22.8122	-47.0719			13.4	13.4	A	5
Spezia et al. (2013)	-26.7478	-53.4064	Araucaria	1	180	440.43	A; S	19
Tabanez et al. (2005)	-22.4082	-49.6987	Interior	1	2178.84	1194.71	A	29
Tortato et al. (2014)	-26.7003	-49.6658	Araucaria	1	3682	1242.04	A; CT	28
Valdez (2012)	-28.3218	-50.751	Araucaria	1	415	177	A	20
Wolfart et al. (2013)	-26.1103	-53.5611	Araucaria	1	220	969.78	A; S	31
References
Almeida EMR, Toniato MTZ, Durigan G (2010) Plano de manejo da Estação Ecológica de Bauru. São Paulo: Instituo Florestal. http://fflorestal.sp.gov.br/files/2012/01/EEBauru/completa.pdf.
Alves TR, Fonseca RC, Engel VL (2012) Mamíferos de médio e grande porte e sua relação com o mosaico de habitats na cuesta de Botucatu, Estado de São Paulo, Brasil. Iheringia 102: 150-158.
Antunes AZ, Eston MR (2009) Mamíferos (Chordata: Mammalia) florestais de médio e grande porte registrados em Barreiro Rico, Anhembi, estado de São Paulo. Rev Inst Flor 21: 201-215.
Barros RSM, Neto OJB, Andriolo A (2007) Estudo de mastofauna num fragmento florestal composto por uma unidade de conservação contígua a uma área privada no município de Juiz de Fora (MG), Brasil e sugestões para o plano de manejo da UC. VIII Congresso de Ecologia do Brasil, Caxambu, Minas Gerais.
Begotti RA (2008) Ocorrência e distribuição espacial de mamíferos não-voadores em reflorestamento no sudeste do Brasil. Monografia, Universidade Estadual Paulista “Júlio de Mesquita Filho”, Rio Claro, São Paulo.
Briani DC, Santori RT, Vieira MV, Gobbi N (2001) Mamíferos não-voadores de um fragmento de mata mesófila semidescídua, do interior do estado de São de Paulo, Brasil. Holos Environ 1: 141-149.
Brocardo CR, Cândido Jr. JF (2012) Persistência de mamíferos de médio e grande porte em fragmentos de Floresta Ombrófila Mista no estado do Paraná, Brasil. R Árvore 36: 301-310.
Brocardo CR, Rodarte R, Bueno RS, Culot L, Galetti M (2012) Mamíferos não voadores do Parque Estadual Carlos Botelho, continuum florestal do Paranapiacaba. Biota Neotrop 12: 198-208.
Carvalho FCD (2009) Levantamento da mastofauna terrestre de médio e grande porte em remanescente de floresta neotropical–Itatinga, SP. Monografia, Universidade Estadual Paulista “Júlio de Mesquita Filho”, Botucatu, São Paulo.
Castilho, C.P. (2010). Comunidade de mamíferos de médio e grande porte em fragmentos de Mata Semidecidual da APA Municipal de Campinas, SP. Dissertação, Universidade Estadual de Campinas.
Cherem JJ, Graipel ME, Tortato M, Althoff S, Brüggemann F, Matos F, Voltolini JC, Freitas R, Illenseer R, Hoffmann F, Ghizoni-Jr. IR, Bevilacqua A, Reinicke R, Salvador CH, Filippini A, Furnari N, Abati K, Moraes M, Moreira T, Oliveira-Santos LGR, Kuhnen V, Maccarini T, Goulart F, Mozerle H, Fantacini F, Dias D, Penedo-Ferreira R, Vieira BP, Simões-Lopes PC (2011) Mastofauna terrestre do Parque E…
Chiarello A (2000) Density and population size of mammals in remnants of Brazilian Atlantic Forest. Conserv Biol 14: 1649–1657.
Chiarello AG (1999) Effects of fragmentation of the Atlantic forest on mammal communities in south-eastern Brazil. Biol Conserv 89: 71-82.
Chiarello AG (2000) Conservation value of a native forest fragment in a region of extensive agriculture. Rev Bras Biol 60: 237-247.
Dias M, Mikich SB (2006) Levantamento e conservação da mastofauna em um remanescente de floresta ombrófila mista, Paraná, Brasil. Pesq Flor Bras 52: 61-78.
Dias WAF, Tezori RFF, Oliveira AK (2012) Registro de mamíferos de médio e grande porte em dois fragmentos florestais no município de São Carlos, Estado de São Paulo. Multiciência 11: 277-293.
Duprat PL, Andriolo A (2011). Mastofauna não-voadora de médio e grande porte em um fragmento de Mata Atlântica no município de Rio Novo, MG. R Bras Zoociênc 13: 163-172.
Eduardo AA, Passamani M (2009) Mammals of medium and large size in Santa Rita do Sapucai, Minas Gerais, southeastern Brazil. Check List 5: 399-404
Falcão FC, Deyna HAG, Paglia A (2012) Medium and large-sized mammals of RPPN Estação Veracel, southernmost Bahia, Brazil. Check List 8: 929-934.
Faria HH (2006) Plano de manejo do Parque Estadual Morro do Diabo. Instituto Florestal, São Paulo. http://fflorestal.sp.gov.br/files/2012/01/morrododiabo.pdf.
Galego JS, Nunes PSO, Cerqueira RC, Costa FM (2014) Mamíferos de médio e grande porte da Reserva Biológica de Pinheiro Grosso. V Simpósio de Pesquisa e Inovação/IV Seminário de Iniciação Científica do IF Sudeste MG-Câmpus Barbacena.
Gaspar DA (2005) Comunidade de mamíferos não voadores de um fragmento de Floresta Atlântica semidecídua do município de Campinas, SP. Tese, Universidade Estadual de Campinas.
Haddad L (2008) Caracterização da comunidade de mamíferos de médio e grande porte na Fazenda Nova América, Cabrália Paulista–SP. Monografia, Universidade Estadual Paulista “Júlio de Mesquita Filho”, Botucatu, São Paulo.
Instituto Ambiental do Paraná – IAP. (2002a). Plano de manejo do Parque Estadual Mata dos Godoy. Secretaria de Estado do Meio Ambiente e Recursos Hídricos, Curitiba, Paraná. http://www.iap.pr.gov.br/modules/conteudo/conteudo.php?conteudo=1218
Instituto Ambiental do Paraná – IAP. (2002b). Plano de manejo do Parque Estadual Rio Guarani. Secretaria de Estado do Meio Ambiente e Recursos Hídricos, Curitiba, Paraná. http://www.iap.pr.gov.br/modules/conteudo/conteudo.php?conteudo=1224
Kasper CB, Mazim FD, Soares JBG, Oliveira TGD, Fabian ME (2007) Composição e abundância relativa dos mamíferos de médio e grande porte no Parque Estadual do Turvo, Rio Grande do Sul, Brasil. Rev Bras Zool 24: 1087-1100.
Keesen F, Nunes AV, Scoss LM (2016) Updated list of mammals of Rio Doce State Park, Minas Gerais, Brazil. Bol Mus Biologia Mello Leitão 38: 139-162.
Kionka DCO (2013) Mastofauna não-voadora em fragmentos florestais nativos circundados por uma matriz agrícola e de pastagem em Palmeira das Missões/RS. Dissertação, Centro Universitário Univates, Lajeado, Rio Grande do Sul.
Lopes PAM, Orsi ML, Marioto AC (2009) Levantamento da fauna de mamíferos em dois fragmentos da zona sul do município de Londrina, Estado do Paraná. IX Congresso de Ecologia do Brasil, São Lourenço, Minas Gerais.
Maciel L, Maciel KPWA (2015) Levantamento preliminar de mamíferos silvestres em uma área de Floresta Ombrófila Mista na região de Porto Vitória-PR. REB 8: 13-28.
Magioli M, Ferraz KMPMB, Setz EZF, Percequillo AR, Rondon MVSS, Kuhnen VV, Canhoto MCS, Santos KEA, Kanda CZ, Fregonezi GL, Prado HA, Ferreira MK, Ribeiro MC, Villela PMS, Coutinho LL, Rodrigues MG (2016) Connectivity maintain mammal assemblages functional diversity within agricultural and fragmented landscapes. Eur J Wildl Res 62: 431-446.
Martins TO, Bunhuolo SP, Ortencio-Filho H, Lacher Jr. TE (2016) Large and medium-sized mammals in the urban park Cinturão Verde, Cianorte, northwestern Paraná. Check List 12: 1851.
Mascarello JC (2012) Levantamento de mamíferos não voadores de um fragmento de mata e seu entorno no município de Joaçaba – SC. Monografia, Universidade do Oeste de Santa Catarina, Joaçaba, Santa Catarina.
Neto OJB, Oliveira EGR, Souza DP, Mello BF, Amorim TOS, Gomes KCP, Andriolo A (2012) Mamíferos de um fragmento florestal particular periurbano de Juiz de Fora, Minas Gerais, Brasil. R Bras Zoociênc 11: 269-276.
Nunes AV, Scoss LM, Prado MR, Lessa GM (2013) Survey of large and medium-sized terrestrial mammals in the Serra do Brigadeiro State Park, Minas Gerais, Brazil. Check List 9: 240-245.
Oliveira MF (2002) Uso de ambientes por mamíferos em área de Floresta Atlântica com plantios de eucaliptos no Vale do Paraíba/SP. Dissertação, Universidade Federal do Paraná, Curitiba, Paraná.
Oliveira VB, Linares AM, Castro-Corrêa GL, Chiarello AG (2013) Inventory of medium and large-sized mammals from Serra do Brigadeiro and Rio Preto State Parks, Minas Gerais, southeastern Brazil. Check List 9: 912-919.
Onghero Jr. O, Favretto MA, Piovezan JC, Spier EF, Guzzi A, Dalavéquia MA (2012) Mamíferos em remanescentes florestais de uma fazenda de plantação de Pinus sp., Água Doce, Santa Catarina, Brasil. Unoesc & Ciência-ACBS 3: 57-64.
Padilha L (2011) Mamíferos. In: Favretto MA (ed) Parque Natural Municipal Rio do Peixe, Joaçaba, SC – volume I: fauna de vertebrados.
Paglia AP, Lopes MOG, Perini FA, Cunha HM (2005) Mammals of the Estação de Preservação e Desenvolvimento Ambiental de Peti (EPDA-Peti), São Gonçalo do Rio Abaixo, Minas Gerais, Brazil. Lundiana 6: 89-96.
Paschoal AMO (2008) Predadores em fragmentos de Mata Atlântica: estudo de caso na RPPN Feliciano Miguel Abdala, Caratinga, MG. Dissertação, Pontifícia Universidade Católica de Minas Gerais, Belo Horizonte, Minas Gerais.
Passamani M, Dalmaschio J, Lopes AS (2005) Mamíferos não-voadores em área de predomínio de Mata Atlântica da Samarco Mineração S.A., município de Anchieta, Espírito Santo. Rev Biotemas 18: 135-149.
Passamani M, Mendes SL, Chiarello AG (2000) Non-volant mammals of the Estação Biológica de Santa Lúcia and adjacent areas of Santa Teresa, Espirito Santo, Brazil. Bol Mus Biol Mello Leitão Zool 11/12: 201-214.
Penido G, Zanzini ACS (2012) Checklist of large and medium-sized mammals of the Estação Ecológica Mata do Cedro, an Atlantic Forest remnant of central Minas Gerais, Brazil. Check List 8: 712-717.
Pereira SN, Dias D, Lima IP, Maas ACS, Martins MA, Bolzan DP, França DS, Oliveira MB, Peracchi AL, Ferreira MFS (2013) Mamíferos de um fragmento florestal em Volta Redonda, Estado do Rio de Janeiro. Biosc J 29: 1017-1027.
Pires DPS, Cademartori CV (2012) Medium and large sized mammals of a semideciduous forest remnant in southern Brazil. Biota Neotrop 12: 239-245.
Prado MR, Rocha EC, Giudice GLM (2008) Mamíferos de médio e grande porte em um fragmento de Mata Atlântica, Minas Gerais, Brasil. Rev Árvore 32: 741-749.
Reale R, Fonseca RCB, Uieda W (2014) Medium and large-sized mammals in a Private Reserve of Natural Heritage in the municipality of Jaú, São Paulo, Brazil. Check List 10: 997-1004.
Rocha-Mendes F, Neves CL, Nobre RDA, Marques RM, Bianconi GV, Galetti M (2015) Non-volant mammals from Núcleo Santa Virgínia, Serra do Mar State Park, São Paulo, Brazil. Biota Neotrop 15: 1-9.
Rosário PF, Bicalho LGL, Barros V, Loures-Ribeiro A, Junqueira FO (2009) Diagnostico preliminar dos mamíferos de médio e grande porte, no município de Belo Oriente, Minas Gerais. IX Congresso de Ecologia do Brasil, São Lourenço, Minas Gerais.
Rossaneis BK (2014) Medium and large-sized mammals in small forest remnants of the Atlantic Forest with anthropogenic influences in the north of Paraná. Semina: Ciências Biológicas e da Saúde 35: 15-24.
Saciloto GAZ (2009). Inventário de mastofauna de médio e grande porte na Estação Experimental de Tupi – Piracicaba – SP. Monografia. Universidade Metodista de Piracicaba.
Santos FCF (2009) Levantamento da mastofauna e identificação das influências antrópicas em dois fragmentos de Mata Atlântica transição com Cerrado de Rubião Junior–Botucatu-SP. Monografia, Universidade Estadual Paulista “Júlio de Mesquita Filho”, Botucatu, São Paulo.
Santos KK, Pacheco GSM, Passamani M (2016) Medium-sized and large mammals from Quedas do Rio Bonito Ecological Park, Minas Gerais, Brazil. Check List 12: 1830.
Silva LD, Passamani M (2009) Mamíferos de médio e grande porte em fragmentos florestais no município de Lavras, MG. Rev Bras Zooc 11: 137-144.
Silva Jr. AP, Pontes ARM (2008) The effect of a mega-fragmentation process on large mammal assemblages in the highly-threatened Pernambuco Endemism Centre, north-eastern Brazil. Biodivers Conserv 17: 1455-1464.
Siviero MCB, Setz EZF (2011). Pegadas de mamíferos em parcelas de areia em fragmentos de vegetação da bacia do ribeirão Ananhumas, Campinas, São Paulo. Rev Inst Flor 23: 39-55.
Spezia MB, Grasel D, Miranda G (2013) Inventário rápido de mamíferos não voadores em um fragmento florestal do bioma Mata Atlântica. Unoesc & Ciência-ACBS 4: 145-154.
Srbek-Araujo AC, Chiarello AG (2008) Domestic dogs in Atlantic Forest preserves of south-eastern Brazil: a camera-trapping study on patterns of entrance and site occupancy rates. Braz J Biol 68: 771-779.
Tabanez MF, Durigan G, Keuroghlian A, Barbosa AF, Freitas CA, Silva CEF, Silva DA, Eaton DP, Brisolla G, Faria HH, Mattos IFA, Lobo MT, Barbosa MR, Rossi M, Souza MG, Machado RB, Pfeifer RM, Ramos VS, Andrade WJ, Contieri WA (2005) Plano de manejo da Estação Ecológica dos Caetetus. IF Sér Reg 29: 1-104.
Tezori RFF (2011) Análise de medidas mitigatórias de impactos antrópicos negativos à mastofauna em uma paisagem rural em São Carlos-SP. Dissertação, Universidade Federal de São Carlos, São Carlos, São Paulo.
Tortato FR, Testoni AF, Althoff SL (2014) Mastofauna terrestre da Reserva Biológica Estadual do Sassafrás, Doutor Pedrinho, Santa Catarina, Sul do Brasil. Biotemas 27: 123-129.
Valdez S (2012) Plano de manejo do Parque Estadual do Ibitiriá. Secretaria Estadual do Meio Ambiente, Porto Alegre, Rio Grande do Sul.
Wolfart MR, Da Fré M, Lucas EM, Miranda GB (2013) Mamíferos terrestres em um remanescente de Mata Atlântica, Paraná, Brasil. Biotemas 26: 111-119.

## Sheet: Table S2
Table S2. Species composition of the 96 assemblages of medium- and large-sized mammals of the Atlantic Forest, Brazil. All studies that compose this dataset are properly cited below.
Studies	Alouatta belzebul	Alouatta caraya	Alouatta guariba	Brachyteles arachnoides	Brachyteles hypoxanthus	Bradypus torquatus	Bradypus variegatus	Cabassous tatouay	Cabassous unicinctus	Callicebus coimbrai	Callicebus melanochir	Callicebus nigritus	Callicebus personatus	Callithrix aurita	Callithrix flaviceps	Callithrix geoffroyi	Callithrix jacchus	Callithrix kuhlii	Callithrix penicillata	Cavia aperea	Cavia fulgida	Cavia intermedia	Cavia magna	Cerdocyon thous	Chaetomys subspinosus	Chrysocyon brachyurus	Coendou insidiosus	Coendou prehensilis	Coendou spinosus	Conepatus chinga	Conepatus semistriatus	Cuniculus paca	Dasyprocta azarae	Dasyprocta leporina	Dasyprocta prymnolopha	Dasypus hybridus	Dasypus novemcinctus	Dasypus septemcinctus	Didelphis albiventris	Didelphis aurita	Eira barbara	Euphractus sexcinctus	Galictis cuja	Galictis vittata	Guerlinguetus brasiliensis	Hydrochoerus hydrochaeris	Leontopithecus caissara	Leontopithecus chrysomelas	Leontopithecus chrysopygus
Almeida et al. (2010)	0	0	0	0	0	0	0	0	0	0	0	0	0	0	0	0	0	0	0	0	0	0	0	1	0	0	0	0	0	0	0	1	1	0	0	0	1	0	1	0	1	1	0	0	0	1	0	0	0
Alves et al. (2012)	0	0	0	0	0	0	0	0	1	0	0	0	0	0	0	0	0	0	0	0	0	0	0	1	0	0	0	0	0	0	1	1	1	0	0	0	1	0	1	0	1	0	0	0	0	1	0	0	0
Antunes and Eston (2009)	0	0	1	1	0	0	0	1	0	0	0	1	0	1	0	0	0	0	0	0	0	0	0	1	0	0	0	0	1	0	0	1	1	0	0	0	1	0	1	0	1	1	1	0	1	1	0	0	0
Barros et al. (2007) and Neto et al. (2009)	0	0	1	0	0	0	1	0	0	0	0	1	0	0	0	0	1	0	1	1	0	0	0	1	0	1	0	0	0	0	0	1	0	0	0	0	1	0	0	1	1	0	0	0	1	1	0	0	0
Begotti (2008)	0	0	0	0	0	0	0	0	0	0	0	0	0	0	0	0	0	0	0	1	0	0	0	1	0	0	0	0	1	0	0	1	0	0	0	0	1	1	1	1	1	0	1	0	0	1	0	0	0
Briani et al. (2001)	0	0	0	0	0	0	0	0	0	0	0	0	1	1	0	0	0	0	0	0	0	0	0	1	0	0	0	0	0	0	0	0	0	0	0	0	1	0	1	1	1	1	0	1	1	0	0	0	0
Brocardo and Cândido Jr. (2012) - 135 ha	0	0	0	0	0	0	0	1	0	0	0	0	0	0	0	0	0	0	0	1	0	0	0	1	0	0	0	0	1	0	0	1	1	0	0	0	1	0	1	1	1	1	1	0	1	0	0	0	0
Brocardo and Cândido Jr. (2012) - 405 ha	0	0	1	0	0	0	0	1	0	0	0	0	0	0	0	0	0	0	0	1	0	0	0	1	0	0	0	0	1	0	0	1	1	0	0	0	1	1	1	1	1	1	1	0	1	1	0	0	0
Brocardo and Cândido Jr. (2012) - 520 ha	0	0	1	0	0	0	0	1	0	0	0	0	0	0	0	0	0	0	0	1	0	0	0	1	0	0	0	0	1	0	0	1	1	0	0	0	1	1	1	1	1	1	1	0	1	0	0	0	0
Brocardo et al. (2012)	0	0	1	1	0	0	0	1	0	0	0	0	0	0	0	0	0	0	0	0	0	0	0	1	0	0	0	0	1	0	0	1	1	0	0	0	1	1	1	1	1	0	1	0	1	1	0	0	1
Carvalho (2009)	0	0	0	0	0	0	0	0	0	0	0	0	0	0	0	0	0	0	0	0	0	0	0	1	0	0	0	0	0	0	0	1	1	0	0	0	1	0	1	0	1	0	0	0	1	0	0	0	0
Castilho (2010) - 3 ha	0	0	0	0	0	0	0	0	0	0	0	0	0	0	0	0	0	0	0	0	0	0	0	0	0	0	0	0	0	0	0	0	0	0	0	0	1	0	1	0	0	0	0	0	0	0	0	0	0
Castilho (2010) - 5 ha	0	0	0	0	0	0	0	0	0	0	0	0	0	0	0	0	0	0	0	0	0	0	0	0	0	0	0	0	0	0	0	0	0	0	0	0	0	0	1	0	0	0	0	0	0	0	0	0	0
Castilho (2010) - 10 ha	0	0	0	0	0	0	0	0	0	0	0	0	0	0	0	0	0	0	0	1	0	0	0	1	0	0	0	0	0	0	0	0	1	0	0	0	1	0	1	0	0	1	0	0	0	0	0	0	0
Castilho (2010) - 10 ha	0	0	0	0	0	0	0	0	0	0	0	0	0	0	0	0	0	0	0	0	0	0	0	0	0	0	0	0	0	0	0	0	0	0	0	0	1	0	1	0	0	1	0	0	0	0	0	0	0
Castilho (2010) - 12 ha	0	0	0	0	0	0	0	0	0	0	0	0	0	0	0	0	0	0	0	0	0	0	0	1	0	0	0	0	0	0	0	0	1	0	0	0	0	0	1	0	1	1	0	0	0	0	0	0	0
Castilho (2010) - 1 ha	0	0	0	0	0	0	0	0	0	0	0	0	0	0	0	0	0	0	0	0	0	0	0	1	0	0	0	0	0	0	0	0	0	0	0	0	0	0	1	0	0	0	0	0	0	0	0	0	0
Castilho (2010) - 8 ha	0	0	0	0	0	0	0	0	0	0	0	0	0	0	0	0	0	0	0	0	0	0	0	1	0	0	0	0	0	0	0	0	0	0	0	0	1	0	1	0	0	0	0	0	0	0	0	0	0
Castilho (2010) - 5 ha	0	0	0	0	0	0	0	0	0	0	0	0	0	0	0	0	0	0	0	0	0	0	0	0	0	0	0	0	0	0	0	0	0	0	0	0	1	0	1	0	0	0	0	0	0	1	0	0	0
Castilho (2010) - 9 ha	0	0	0	0	0	0	0	0	0	0	0	0	0	0	0	0	0	0	0	0	0	0	0	0	0	0	0	0	0	0	0	0	0	0	0	0	1	0	1	0	0	1	0	0	0	0	0	0	0
Cherem et al. (2011)	0	0	1	0	0	0	0	1	0	0	0	0	0	0	0	0	0	0	0	0	0	1	1	1	0	0	0	0	1	1	0	1	1	0	0	0	1	1	1	1	1	1	1	0	1	1	0	0	0
Chiarello (1999) - 1504ha	0	0	0	0	0	1	0	0	1	0	0	0	0	0	0	1	0	0	0	0	0	0	0	1	1	0	1	0	0	0	0	1	0	1	0	0	1	0	0	1	1	0	0	0	1	1	0	0	0
Chiarello (1999) - 210ha	0	0	0	0	0	1	0	0	0	0	0	0	1	0	0	1	0	0	0	0	0	0	0	1	1	0	1	0	0	0	0	1	0	0	0	0	1	0	0	1	1	0	0	0	1	1	0	0	0
Chiarello (1999) - 21800ha	0	0	1	0	0	0	1	0	1	0	0	0	1	0	0	1	0	0	0	0	0	0	0	1	1	0	1	0	0	0	0	1	0	1	0	0	1	0	0	1	1	0	0	1	1	1	0	0	0
Chiarello (1999) - 2400ha	0	0	0	0	0	0	1	0	1	0	0	0	1	0	0	1	0	0	0	0	0	0	0	1	1	0	1	0	0	0	0	1	0	1	0	0	1	0	0	1	1	0	0	1	1	1	0	0	0
Chiarello (1999) - 24250ha	0	0	1	0	0	0	1	0	1	0	0	0	1	0	0	1	0	0	0	0	0	0	0	1	1	0	1	0	0	0	0	1	0	1	0	0	1	0	0	1	1	0	0	1	1	1	0	0	0
Chiarello (1999) - 260ha	0	0	1	0	0	1	0	0	0	0	0	0	1	0	0	1	0	0	0	0	0	0	0	1	1	0	1	0	0	0	0	1	0	0	0	0	1	0	0	1	1	0	0	0	1	1	0	0	0
Chiarello (2000)	0	0	0	0	0	0	0	0	0	0	0	0	0	0	0	0	0	0	1	0	1	0	0	1	0	1	0	0	1	0	0	1	0	0	0	0	1	0	1	0	0	1	0	0	0	1	0	0	0
Dias and Mikichi (2006)	0	0	0	0	0	0	0	1	0	0	0	0	0	0	0	0	0	0	0	1	0	0	0	1	0	0	0	0	1	0	0	0	1	0	0	0	1	1	1	1	1	0	1	0	1	0	0	0	0
Dias et al. (2012)	0	0	0	0	0	0	0	0	0	0	0	1	0	0	0	0	0	0	0	0	0	0	0	1	0	1	0	0	1	0	1	0	1	0	0	0	0	1	1	0	1	0	0	1	0	0	0	0	0
Duprat and Andriolo (2011)	0	0	1	0	0	0	0	1	0	0	0	1	0	1	0	0	0	0	1	0	0	0	0	1	0	1	0	1	0	0	0	1	0	0	0	0	1	0	0	1	1	0	0	0	1	1	0	0	0
Eduardo and Passamani (2009)	0	0	1	0	0	0	0	0	0	0	0	1	0	1	0	0	0	0	0	1	0	0	0	1	0	0	0	0	0	0	0	1	1	0	0	0	1	0	1	0	1	0	0	0	1	0	0	0	0
Falcão et al. (2012)	0	0	0	0	0	0	1	0	1	0	1	0	0	0	0	1	0	0	0	0	0	0	0	1	1	0	1	0	0	0	1	1	0	1	0	0	1	0	0	1	1	1	1	0	1	1	0	0	0
Faria (2006)	0	0	1	0	0	0	0	0	1	0	0	0	0	0	0	0	0	0	0	1	0	0	0	1	0	1	0	0	0	0	0	1	1	0	0	0	1	0	1	0	1	1	0	1	1	1	0	0	1
Galego et al. (2014)	0	0	0	0	0	0	0	0	1	0	0	1	0	0	0	0	0	0	1	0	0	0	0	1	0	0	1	0	0	0	0	1	0	1	0	0	1	0	1	0	1	0	1	0	0	0	0	0	0
Gaspar (2005)	0	0	1	0	0	0	0	0	0	0	0	1	0	0	0	0	1	0	0	0	0	0	0	1	0	1	0	0	1	0	0	1	0	0	0	0	1	0	0	1	1	0	1	0	1	1	0	0	0
Haddad (2008)	0	0	0	0	0	0	0	1	0	0	0	0	0	0	0	0	0	0	0	1	0	0	0	1	0	0	0	0	1	0	1	0	1	0	0	0	1	1	1	0	1	1	1	0	0	1	0	0	0
IAP (2002a)	0	0	0	0	0	0	0	0	0	0	0	0	0	0	0	0	0	0	0	0	0	0	0	1	0	0	0	0	1	0	0	1	1	0	0	0	1	0	1	0	0	0	0	0	1	1	0	0	0
IAP (2002b)	0	0	0	0	0	0	0	0	0	0	0	0	0	0	0	0	0	0	0	1	0	0	0	1	0	0	0	0	1	0	0	1	1	0	0	0	1	0	1	1	1	0	1	0	1	1	0	0	0
Kasper et al. (2007)	0	0	1	0	0	0	0	0	0	0	0	0	0	0	0	0	0	0	0	0	0	0	0	1	0	0	0	0	1	0	0	1	1	0	0	0	1	1	1	1	1	1	1	1	1	1	0	0	0
Keesen et al. (2016)	0	0	1	0	1	0	1	0	0	0	0	1	0	1	1	1	0	0	0	1	0	0	0	1	0	1	0	0	1	0	1	1	1	0	0	0	1	0	0	1	1	1	1	0	1	1	0	0	0
Kionka (2013) - 5 ha	0	0	0	0	0	0	0	0	0	0	0	0	0	0	0	0	0	0	0	0	0	0	0	1	0	0	0	0	0	0	0	0	0	0	0	1	1	0	0	0	0	0	0	0	0	1	0	0	0
Kionka (2013) - 10 ha	0	0	0	0	0	0	0	0	0	0	0	0	0	0	0	0	0	0	0	0	0	0	0	1	0	0	0	0	0	0	0	0	0	0	0	0	1	0	1	0	0	0	0	0	0	0	0	0	0
Kionka (2013) - 5 ha	0	0	0	0	0	0	0	0	0	0	0	0	0	0	0	0	0	0	0	0	0	0	0	1	0	0	0	0	0	0	0	0	0	0	0	0	1	0	1	0	0	0	0	0	0	0	0	0	0
Lopes et al. (2009)	0	0	0	0	0	0	0	0	0	0	0	0	0	0	0	0	0	0	0	1	0	0	0	1	0	0	0	0	0	0	0	0	1	0	0	0	1	0	1	1	1	0	0	0	0	1	0	0	0
Maciel and Maciel (2015)	0	0	1	0	0	0	0	0	0	0	0	0	0	0	0	0	0	0	0	0	0	0	0	0	0	0	0	0	1	0	0	0	1	0	0	0	1	0	1	0	0	0	0	0	0	0	0	0	0
Magioli et al. (2016) - 60 ha	0	0	0	0	0	0	0	1	0	0	0	0	0	0	0	0	0	0	0	1	0	0	0	1	0	1	0	0	1	0	0	0	0	0	0	0	1	0	1	0	0	0	0	0	0	1	0	0	0
Magioli et al. (2016) - 204.64 ha	0	0	1	0	0	0	0	1	0	0	0	0	0	0	0	0	0	0	1	0	0	0	0	1	0	1	0	0	1	0	0	1	0	0	0	0	1	1	0	1	1	1	1	0	0	1	0	0	0
Magioli et al. (2016) - 59.5 ha	0	0	0	0	0	0	0	1	0	0	0	0	0	0	0	0	0	0	1	0	0	0	0	1	0	1	0	0	0	0	0	0	0	0	0	0	1	1	1	1	0	1	1	0	1	1	0	0	0
Magioli et al. (2016) - 45.56 ha	0	0	0	0	0	0	0	1	0	0	0	0	0	0	0	0	0	0	0	0	0	0	0	1	0	1	0	0	0	0	0	1	0	0	0	0	1	0	1	0	0	0	1	0	0	1	0	0	0
Magioli et al. (2016) - 73.08 ha	0	0	0	0	0	0	0	1	0	0	0	0	0	0	0	0	0	0	0	0	0	0	0	1	0	1	0	0	1	0	0	0	0	0	0	0	1	0	1	0	0	1	1	0	0	0	0	0	0
Magioli et al. (2016) - 64.68 ha	0	0	0	0	0	0	0	1	0	0	0	0	0	0	0	0	0	0	0	0	0	0	0	1	0	0	0	0	0	0	0	1	0	0	0	0	1	0	1	0	0	0	1	0	0	1	0	0	0
Magioli et al. (2016) - 180 ha	0	0	0	0	0	0	0	1	0	0	0	0	0	0	0	0	0	0	0	0	0	0	0	1	0	1	0	0	1	0	0	1	0	0	0	0	1	1	1	0	1	1	1	0	1	1	0	0	0
Magioli et al. (2016) - 234.13 ha	0	0	1	0	0	0	0	0	0	0	0	0	0	0	0	0	0	0	1	1	0	0	0	1	0	0	0	0	1	0	0	1	0	0	0	0	1	1	1	1	1	1	1	0	1	1	0	0	0
Martins et al. (2016)	0	0	0	0	0	0	0	0	0	0	0	0	0	0	0	0	0	0	0	0	0	0	0	1	0	0	0	0	1	0	0	1	1	0	0	0	1	0	1	1	1	1	0	0	0	1	0	0	0
Mascarello (2012)	0	0	0	0	0	0	0	0	0	0	0	0	0	0	0	0	0	0	0	1	0	0	0	1	0	0	0	0	1	0	0	0	1	0	0	0	1	0	1	0	0	0	0	0	1	0	0	0	0
Nunes et al. (2013) and Oliveira et al. (2013)	0	0	1	0	1	0	0	0	0	0	0	1	0	0	0	0	0	0	0	1	0	0	0	1	0	0	0	0	0	0	0	1	0	0	0	0	1	0	0	1	1	0	1	0	1	0	0	0	0
Oliveira (2002)	0	0	0	0	0	0	0	0	1	0	0	0	0	0	0	0	0	0	0	0	0	0	0	1	0	0	0	0	0	0	0	0	0	0	0	0	1	0	0	1	1	0	0	0	1	1	0	0	0
Onghero Jr. et al. (2012)	0	0	0	0	0	0	0	0	0	0	0	0	0	0	0	0	0	0	0	1	0	0	0	1	0	0	0	0	0	0	0	0	0	0	0	0	1	0	1	0	0	0	0	0	0	1	0	0	0
Padilha (2011)	0	0	0	0	0	0	0	1	0	0	0	0	0	0	0	0	0	0	0	0	0	0	0	1	0	0	0	0	1	0	0	1	1	0	0	0	1	1	1	0	0	0	1	0	1	1	0	0	0
Paglia et al. (2005)	0	0	0	0	0	0	0	0	0	0	0	1	0	0	0	1	0	0	0	0	0	0	0	1	0	1	0	0	0	0	0	1	1	0	0	0	1	0	1	1	1	0	1	0	1	1	0	0	0
Paschoal (2008)	0	0	1	0	1	0	1	1	0	0	0	0	0	0	1	0	0	0	0	0	0	0	0	0	0	0	1	0	0	0	0	1	0	1	0	0	1	0	0	0	1	0	1	0	0	1	0	0	0
Passamani et al. (2000) and Srbek-Araujo and Chiarello (2008)	0	0	1	1	0	1	1	1	0	0	0	0	1	0	1	1	0	0	0	0	1	0	0	1	0	0	1	0	0	0	0	1	0	1	0	0	1	1	0	1	1	1	1	0	1	1	0	0	0
Passamani et al. (2005)	0	0	0	0	0	0	0	0	0	0	0	0	0	0	0	0	0	0	0	1	0	0	0	1	0	0	1	0	0	0	0	1	0	0	0	0	1	1	0	1	0	1	0	0	1	0	0	0	0
Penido e Zanzini (2012)	0	0	0	0	0	0	0	0	0	0	0	1	0	0	0	0	0	0	1	0	0	0	0	1	0	0	0	0	0	0	1	1	1	0	0	0	1	0	1	0	1	1	0	0	0	0	0	0	0
Pereira et al. (2013)	0	0	0	0	0	0	0	1	0	0	0	0	0	0	0	0	1	0	1	0	1	0	0	1	0	1	0	0	1	1	0	1	1	0	0	0	1	1	0	1	1	0	1	0	1	1	0	0	0
Pires e Cademartori (2012)	0	0	1	0	0	0	0	0	0	0	0	0	0	0	0	0	1	0	0	1	0	0	0	1	0	0	0	0	1	1	0	0	1	0	0	0	1	0	1	0	0	0	0	0	0	1	0	0	0
Prado et al. (2008)	0	0	0	0	0	0	1	0	0	0	0	1	0	0	0	0	0	0	0	0	0	0	0	1	0	1	1	0	0	0	1	1	0	1	0	0	1	0	0	1	0	1	1	0	0	1	0	0	0
Reale et al. (2014)	0	0	0	0	0	0	0	0	1	0	0	0	0	0	0	0	0	0	0	0	0	0	0	1	0	1	0	0	1	0	1	1	1	0	0	0	1	0	0	0	1	1	1	0	1	1	0	0	0
Rocha-Mendes et al. (2015)	0	0	1	0	0	0	1	1	0	0	0	1	0	1	0	0	0	0	0	0	0	0	0	1	0	0	0	0	1	0	0	1	0	1	0	0	1	0	0	1	1	1	1	0	1	1	0	0	0
Rosário et al. (2009)	0	0	0	0	0	0	0	0	0	0	0	0	0	0	0	0	0	0	0	0	0	0	0	1	0	0	0	0	0	0	0	1	0	1	0	0	0	0	0	0	0	0	0	0	0	0	0	0	0
Rossaneis (2014) - 10.4 ha	0	0	0	0	0	0	0	0	0	0	0	0	0	0	0	0	0	0	0	0	0	0	0	1	0	0	0	0	0	0	0	0	1	0	0	0	1	0	1	0	0	0	0	0	0	1	0	0	0
Rossaneis (2014) - 6 ha	0	0	0	0	0	0	0	0	0	0	0	0	0	0	0	0	0	0	0	0	0	0	0	1	0	0	0	0	0	0	0	0	1	0	0	0	1	0	1	0	1	0	1	0	0	0	0	0	0
Rossaneis (2014) - 5.4 ha	0	0	0	0	0	0	0	0	0	0	0	0	0	0	0	0	0	0	0	0	0	0	0	1	0	0	0	0	0	0	0	0	1	0	0	0	1	0	1	0	1	0	0	0	0	1	0	0	0
Rossaneis (2014) - 15 ha	0	0	0	0	0	0	0	0	0	0	0	0	0	0	0	0	0	0	0	0	0	0	0	1	0	0	0	0	0	0	0	1	1	0	0	0	1	0	1	0	0	0	0	0	0	1	0	0	0
Saciloto (2009)	0	0	0	0	0	0	0	0	0	0	0	0	0	0	0	0	0	0	0	0	0	0	0	1	0	0	0	0	0	0	1	0	1	0	0	0	1	0	1	1	0	1	0	0	0	1	0	0	0
Santos (2009) - 34.6 ha	0	0	0	0	0	0	0	0	0	0	0	0	0	0	0	0	0	0	0	1	0	0	0	1	0	0	0	0	1	0	0	1	1	0	0	0	1	0	1	0	0	1	0	0	1	0	0	0	0
Santos (2009) - 20 ha	0	0	0	0	0	0	0	0	0	0	0	0	0	0	0	0	0	0	0	1	0	0	0	0	0	0	0	0	1	0	0	1	1	0	0	0	1	0	1	0	1	0	1	0	1	1	0	0	0
Santos et al. (2016)	0	0	0	0	0	0	0	0	0	0	0	1	0	0	0	0	0	0	1	0	0	0	0	1	0	1	0	0	0	0	0	1	0	0	0	0	1	0	1	1	1	1	0	0	0	1	0	0	0
Silva and Passamani (2009) - 7.2 ha	0	0	0	0	0	0	0	0	0	0	0	1	0	0	0	0	0	0	1	0	0	0	0	1	0	0	0	0	0	0	0	0	0	0	0	0	1	0	1	1	1	0	0	0	0	0	0	0	0
Silva and Passamani (2009) - 11.8 ha	0	0	0	0	0	0	0	0	1	0	0	1	0	0	0	0	0	0	1	0	0	0	0	1	0	0	0	0	0	0	1	0	0	0	0	0	1	0	1	0	0	1	0	0	0	0	0	0	0
Silva and Passamani (2009) - 1.03 ha	0	0	0	0	0	0	0	0	0	0	0	0	0	0	0	0	0	0	1	0	0	0	0	0	0	0	1	0	0	0	0	0	0	0	0	0	0	0	1	0	0	1	0	0	0	0	0	0	0
Silva and Passamani (2009) - 7.6 ha	0	0	0	0	0	0	0	0	0	0	0	1	0	0	0	0	0	0	1	0	0	0	0	1	0	0	0	0	0	0	0	0	0	0	0	0	0	0	1	1	0	1	0	0	0	0	0	0	0
Silva and Passamani (2009) - 7.8 ha	0	0	0	0	0	0	0	0	0	0	0	1	0	0	0	0	0	0	1	0	0	0	0	0	0	0	0	0	0	0	1	0	0	0	0	0	0	0	1	0	0	1	0	0	0	0	0	0	0
Silva et al. (2009)	0	0	0	0	0	0	0	0	0	0	0	1	0	0	0	0	0	0	1	0	0	0	0	0	0	0	0	1	0	0	0	1	0	0	0	0	1	0	1	0	1	0	1	0	0	1	0	0	0
Silva Jr. e Pontes (2008) - 10ha	0	0	0	0	0	0	0	0	1	0	0	0	0	0	0	0	1	0	0	0	0	0	0	0	0	0	0	0	0	0	0	0	0	0	0	0	0	0	0	0	0	1	0	0	0	0	0	0	0
Silva Jr. e Pontes (2008) - 300ha	0	0	0	0	0	0	0	0	1	0	0	0	0	0	0	0	0	0	0	0	0	0	0	0	0	0	0	0	0	0	0	0	0	0	0	0	1	0	0	0	1	0	0	0	1	0	0	0	0
Silva Jr. e Pontes (2008) - 500ha	0	0	0	0	0	0	1	0	1	0	0	0	0	0	0	0	1	0	0	0	0	0	0	0	0	0	0	0	0	0	0	1	0	0	1	0	1	0	0	0	1	0	0	0	1	1	0	0	0
Silva Jr. e Pontes (2008) - 50ha	0	0	0	0	0	0	0	0	1	0	0	0	0	0	0	0	1	0	0	0	0	0	0	1	0	0	0	1	0	0	0	0	0	0	1	0	0	0	0	0	0	1	0	0	1	0	0	0	0
Siviero e Setz (2011) - 11.4ha	0	0	0	0	0	0	0	0	0	0	0	0	0	0	0	0	0	0	0	1	0	0	0	0	0	0	0	0	1	0	0	0	0	0	0	0	0	0	1	0	0	0	0	0	0	1	0	0	0
Siviero e Setz (2011) - 13.4ha	0	0	0	0	0	0	0	0	0	0	0	0	0	0	0	0	0	0	0	1	0	0	0	0	0	0	0	0	0	0	0	0	0	0	0	0	0	0	1	0	0	0	0	0	0	1	0	0	0
Spezia et al. (2013)	0	0	0	0	0	0	0	0	0	0	0	0	0	0	0	0	0	0	0	1	0	0	0	1	0	0	0	0	1	0	0	1	0	0	0	0	1	0	1	0	1	0	1	0	1	1	0	0	0
Tabanez et al. (2005)	0	0	1	0	0	0	0	0	1	0	0	0	0	0	0	0	0	0	0	0	0	0	0	1	0	0	0	0	1	0	0	1	1	0	0	0	1	0	0	1	1	1	0	1	1	1	0	0	1
Tortato et al. (2014)	0	0	1	0	0	0	0	1	0	0	0	0	0	0	0	0	0	0	0	1	0	0	0	1	0	0	0	0	1	0	0	1	1	0	0	0	1	1	0	1	1	0	1	0	1	1	0	0	0
Valdez (2012)	0	0	1	0	0	0	0	0	0	0	0	0	0	0	0	0	0	0	0	1	0	0	0	1	0	0	0	0	0	0	0	0	0	0	0	0	1	0	0	0	0	0	0	0	0	1	0	0	0
Wolfart et al. (2013)	0	0	0	0	0	0	0	0	0	0	0	0	0	0	0	0	0	0	0	1	0	0	0	1	0	0	0	0	1	0	0	1	1	0	0	0	1	0	1	0	1	0	0	0	1	0	0	0	0
References
Almeida EMR, Toniato MTZ, Durigan G (2010) Plano de manejo da Estação Ecológica de Bauru. São Paulo: Instituo Florestal. http://fflorestal.sp.gov.br/files/2012/01/EEBauru/completa.pdf.
Alves TR, Fonseca RC, Engel VL (2012) Mamíferos de médio e grande porte e sua relação com o mosaico de habitats na cuesta de Botucatu, Estado de São Paulo, Brasil. Iheringia 102: 150-158.
Antunes AZ, Eston MR (2009) Mamíferos (Chordata: Mammalia) florestais de médio e grande porte registrados em Barreiro Rico, Anhembi, estado de São Paulo. Rev Inst Flor 21: 201-215.
Barros RSM, Neto OJB, Andriolo A (2007) Estudo de mastofauna num fragmento florestal composto por uma unidade de conservação contígua a uma área privada no município de Juiz de Fora (MG), Brasil e sugestões para o plano de manejo da UC. VIII Congresso de Ecologia do Brasil, Caxambu, Minas Gerais.
Begotti RA (2008) Ocorrência e distribuição espacial de mamíferos não-voadores em reflorestamento no sudeste do Brasil. Monografia, Universidade Estadual Paulista “Júlio de Mesquita Filho”, Rio Claro, São Paulo.
Briani DC, Santori RT, Vieira MV, Gobbi N (2001) Mamíferos não-voadores de um fragmento de mata mesófila semidescídua, do interior do estado de São de Paulo, Brasil. Holos Environ 1: 141-149.
Brocardo CR, Cândido Jr. JF (2012) Persistência de mamíferos de médio e grande porte em fragmentos de Floresta Ombrófila Mista no estado do Paraná, Brasil. R Árvore 36: 301-310.
Brocardo CR, Rodarte R, Bueno RS, Culot L, Galetti M (2012) Mamíferos não voadores do Parque Estadual Carlos Botelho, continuum florestal do Paranapiacaba. Biota Neotrop 12: 198-208.
Carvalho FCD (2009) Levantamento da mastofauna terrestre de médio e grande porte em remanescente de floresta neotropical–Itatinga, SP. Monografia, Universidade Estadual Paulista “Júlio de Mesquita Filho”, Botucatu, São Paulo.
Castilho, C.P. (2010). Comunidade de mamíferos de médio e grande porte em fragmentos de Mata Semidecidual da APA Municipal de Campinas, SP. Dissertação, Universidade Estadual de Campinas.
Cherem JJ, Graipel ME, Tortato M, Althoff S, Brüggemann F, Matos F, Voltolini JC, Freitas R, Illenseer R, Hoffmann F, Ghizoni-Jr. IR, Bevilacqua A, Reinicke R, Salvador CH, Filippini A, Furnari N, Abati K, Moraes M, Moreira T, Oliveira-Santos LGR, Kuhnen V, Maccarini T, Goulart F, Mozerle H, Fantacini F, Dias D, Penedo-Ferreira R, Vieira BP, Simões-Lopes PC (2011) Mastofauna terrestre do Parque E…
Chiarello A (2000) Density and population size of mammals in remnants of Brazilian Atlantic Forest. Conserv Biol 14: 1649–1657.
Chiarello AG (1999) Effects of fragmentation of the Atlantic forest on mammal communities in south-eastern Brazil. Biol Conserv 89: 71-82.
Chiarello AG (2000) Conservation value of a native forest fragment in a region of extensive agriculture. Rev Bras Biol 60: 237-247.
Dias M, Mikich SB (2006) Levantamento e conservação da mastofauna em um remanescente de floresta ombrófila mista, Paraná, Brasil. Pesq Flor Bras 52: 61-78.
Dias WAF, Tezori RFF, Oliveira AK (2012) Registro de mamíferos de médio e grande porte em dois fragmentos florestais no município de São Carlos, Estado de São Paulo. Multiciência 11: 277-293.
Duprat PL, Andriolo A (2011). Mastofauna não-voadora de médio e grande porte em um fragmento de Mata Atlântica no município de Rio Novo, MG. R Bras Zoociênc 13: 163-172.
Eduardo AA, Passamani M (2009) Mammals of medium and large size in Santa Rita do Sapucai, Minas Gerais, southeastern Brazil. Check List 5: 399-404
Falcão FC, Deyna HAG, Paglia A (2012) Medium and large-sized mammals of RPPN Estação Veracel, southernmost Bahia, Brazil. Check List 8: 929-934.
Faria HH (2006) Plano de manejo do Parque Estadual Morro do Diabo. Instituto Florestal, São Paulo. http://fflorestal.sp.gov.br/files/2012/01/morrododiabo.pdf.
Galego JS, Nunes PSO, Cerqueira RC, Costa FM (2014) Mamíferos de médio e grande porte da Reserva Biológica de Pinheiro Grosso. V Simpósio de Pesquisa e Inovação/IV Seminário de Iniciação Científica do IF Sudeste MG-Câmpus Barbacena.
Gaspar DA (2005) Comunidade de mamíferos não voadores de um fragmento de Floresta Atlântica semidecídua do município de Campinas, SP. Tese, Universidade Estadual de Campinas.
Haddad L (2008) Caracterização da comunidade de mamíferos de médio e grande porte na Fazenda Nova América, Cabrália Paulista–SP. Monografia, Universidade Estadual Paulista “Júlio de Mesquita Filho”, Botucatu, São Paulo.
Instituto Ambiental do Paraná – IAP. (2002a). Plano de manejo do Parque Estadual Mata dos Godoy. Secretaria de Estado do Meio Ambiente e Recursos Hídricos, Curitiba, Paraná. http://www.iap.pr.gov.br/modules/conteudo/conteudo.php?conteudo=1218
Instituto Ambiental do Paraná – IAP. (2002b). Plano de manejo do Parque Estadual Rio Guarani. Secretaria de Estado do Meio Ambiente e Recursos Hídricos, Curitiba, Paraná. http://www.iap.pr.gov.br/modules/conteudo/conteudo.php?conteudo=1224
Kasper CB, Mazim FD, Soares JBG, Oliveira TGD, Fabian ME (2007) Composição e abundância relativa dos mamíferos de médio e grande porte no Parque Estadual do Turvo, Rio Grande do Sul, Brasil. Rev Bras Zool 24: 1087-1100.
Keesen F, Nunes AV, Scoss LM (2016) Updated list of mammals of Rio Doce State Park, Minas Gerais, Brazil. Bol Mus Biologia Mello Leitão 38: 139-162.
Kionka DCO (2013) Mastofauna não-voadora em fragmentos florestais nativos circundados por uma matriz agrícola e de pastagem em Palmeira das Missões/RS. Dissertação, Centro Universitário Univates, Lajeado, Rio Grande do Sul.
Lopes PAM, Orsi ML, Marioto AC (2009) Levantamento da fauna de mamíferos em dois fragmentos da zona sul do município de Londrina, Estado do Paraná. IX Congresso de Ecologia do Brasil, São Lourenço, Minas Gerais.
Maciel L, Maciel KPWA (2015) Levantamento preliminar de mamíferos silvestres em uma área de Floresta Ombrófila Mista na região de Porto Vitória-PR. REB 8: 13-28.
Magioli M, Ferraz KMPMB, Setz EZF, Percequillo AR, Rondon MVSS, Kuhnen VV, Canhoto MCS, Santos KEA, Kanda CZ, Fregonezi GL, Prado HA, Ferreira MK, Ribeiro MC, Villela PMS, Coutinho LL, Rodrigues MG (2016) Connectivity maintain mammal assemblages functional diversity within agricultural and fragmented landscapes. Eur J Wildl Res 62: 431-446.
Martins TO, Bunhuolo SP, Ortencio-Filho H, Lacher Jr. TE (2016) Large and medium-sized mammals in the urban park Cinturão Verde, Cianorte, northwestern Paraná. Check List 12: 1851.
Mascarello JC (2012) Levantamento de mamíferos não voadores de um fragmento de mata e seu entorno no município de Joaçaba – SC. Monografia, Universidade do Oeste de Santa Catarina, Joaçaba, Santa Catarina.
Neto OJB, Oliveira EGR, Souza DP, Mello BF, Amorim TOS, Gomes KCP, Andriolo A (2012) Mamíferos de um fragmento florestal particular periurbano de Juiz de Fora, Minas Gerais, Brasil. R Bras Zoociênc 11: 269-276.
Nunes AV, Scoss LM, Prado MR, Lessa GM (2013) Survey of large and medium-sized terrestrial mammals in the Serra do Brigadeiro State Park, Minas Gerais, Brazil. Check List 9: 240-245.
Oliveira MF (2002) Uso de ambientes por mamíferos em área de Floresta Atlântica com plantios de eucaliptos no Vale do Paraíba/SP. Dissertação, Universidade Federal do Paraná, Curitiba, Paraná.
Oliveira VB, Linares AM, Castro-Corrêa GL, Chiarello AG (2013) Inventory of medium and large-sized mammals from Serra do Brigadeiro and Rio Preto State Parks, Minas Gerais, southeastern Brazil. Check List 9: 912-919.
Onghero Jr. O, Favretto MA, Piovezan JC, Spier EF, Guzzi A, Dalavéquia MA (2012) Mamíferos em remanescentes florestais de uma fazenda de plantação de Pinus sp., Água Doce, Santa Catarina, Brasil. Unoesc & Ciência-ACBS 3: 57-64.
Padilha L (2011) Mamíferos. In: Favretto MA (ed) Parque Natural Municipal Rio do Peixe, Joaçaba, SC – volume I: fauna de vertebrados.
Paglia AP, Lopes MOG, Perini FA, Cunha HM (2005) Mammals of the Estação de Preservação e Desenvolvimento Ambiental de Peti (EPDA-Peti), São Gonçalo do Rio Abaixo, Minas Gerais, Brazil. Lundiana 6: 89-96.
Paschoal AMO (2008) Predadores em fragmentos de Mata Atlântica: estudo de caso na RPPN Feliciano Miguel Abdala, Caratinga, MG. Dissertação, Pontifícia Universidade Católica de Minas Gerais, Belo Horizonte, Minas Gerais.
Passamani M, Dalmaschio J, Lopes AS (2005) Mamíferos não-voadores em área de predomínio de Mata Atlântica da Samarco Mineração S.A., município de Anchieta, Espírito Santo. Rev Biotemas 18: 135-149.
Passamani M, Mendes SL, Chiarello AG (2000) Non-volant mammals of the Estação Biológica de Santa Lúcia and adjacent areas of Santa Teresa, Espirito Santo, Brazil. Bol Mus Biol Mello Leitão Zool 11/12: 201-214.
Penido G, Zanzini ACS (2012) Checklist of large and medium-sized mammals of the Estação Ecológica Mata do Cedro, an Atlantic Forest remnant of central Minas Gerais, Brazil. Check List 8: 712-717.
Pereira SN, Dias D, Lima IP, Maas ACS, Martins MA, Bolzan DP, França DS, Oliveira MB, Peracchi AL, Ferreira MFS (2013) Mamíferos de um fragmento florestal em Volta Redonda, Estado do Rio de Janeiro. Biosc J 29: 1017-1027.
Pires DPS, Cademartori CV (2012) Medium and large sized mammals of a semideciduous forest remnant in southern Brazil. Biota Neotrop 12: 239-245.
Prado MR, Rocha EC, Giudice GLM (2008) Mamíferos de médio e grande porte em um fragmento de Mata Atlântica, Minas Gerais, Brasil. Rev Árvore 32: 741-749.
Reale R, Fonseca RCB, Uieda W (2014) Medium and large-sized mammals in a Private Reserve of Natural Heritage in the municipality of Jaú, São Paulo, Brazil. Check List 10: 997-1004.
Rocha-Mendes F, Neves CL, Nobre RDA, Marques RM, Bianconi GV, Galetti M (2015) Non-volant mammals from Núcleo Santa Virgínia, Serra do Mar State Park, São Paulo, Brazil. Biota Neotrop 15: 1-9.
Rosário PF, Bicalho LGL, Barros V, Loures-Ribeiro A, Junqueira FO (2009) Diagnostico preliminar dos mamíferos de médio e grande porte, no município de Belo Oriente, Minas Gerais. IX Congresso de Ecologia do Brasil, São Lourenço, Minas Gerais.
Rossaneis BK (2014) Medium and large-sized mammals in small forest remnants of the Atlantic Forest with anthropogenic influences in the north of Paraná. Semina: Ciências Biológicas e da Saúde 35: 15-24.
Saciloto GAZ (2009). Inventário de mastofauna de médio e grande porte na Estação Experimental de Tupi – Piracicaba – SP. Monografia. Universidade Metodista de Piracicaba.
Santos FCF (2009) Levantamento da mastofauna e identificação das influências antrópicas em dois fragmentos de Mata Atlântica transição com Cerrado de Rubião Junior–Botucatu-SP. Monografia, Universidade Estadual Paulista “Júlio de Mesquita Filho”, Botucatu, São Paulo.
Santos KK, Pacheco GSM, Passamani M (2016) Medium-sized and large mammals from Quedas do Rio Bonito Ecological Park, Minas Gerais, Brazil. Check List 12: 1830.
Silva LD, Passamani M (2009) Mamíferos de médio e grande porte em fragmentos florestais no município de Lavras, MG. Rev Bras Zooc 11: 137-144.
Silva Jr. AP, Pontes ARM (2008) The effect of a mega-fragmentation process on large mammal assemblages in the highly-threatened Pernambuco Endemism Centre, north-eastern Brazil. Biodivers Conserv 17: 1455-1464.
Siviero MCB, Setz EZF (2011). Pegadas de mamíferos em parcelas de areia em fragmentos de vegetação da bacia do ribeirão Ananhumas, Campinas, São Paulo. Rev Inst Flor 23: 39-55.
Spezia MB, Grasel D, Miranda G (2013) Inventário rápido de mamíferos não voadores em um fragmento florestal do bioma Mata Atlântica. Unoesc & Ciência-ACBS 4: 145-154.
Srbek-Araujo AC, Chiarello AG (2008) Domestic dogs in Atlantic Forest preserves of south-eastern Brazil: a camera-trapping study on patterns of entrance and site occupancy rates. Braz J Biol 68: 771-779.
Tabanez MF, Durigan G, Keuroghlian A, Barbosa AF, Freitas CA, Silva CEF, Silva DA, Eaton DP, Brisolla G, Faria HH, Mattos IFA, Lobo MT, Barbosa MR, Rossi M, Souza MG, Machado RB, Pfeifer RM, Ramos VS, Andrade WJ, Contieri WA (2005) Plano de manejo da Estação Ecológica dos Caetetus. IF Sér Reg 29: 1-104.
Tezori RFF (2011) Análise de medidas mitigatórias de impactos antrópicos negativos à mastofauna em uma paisagem rural em São Carlos-SP. Dissertação, Universidade Federal de São Carlos, São Carlos, São Paulo.
Tortato FR, Testoni AF, Althoff SL (2014) Mastofauna terrestre da Reserva Biológica Estadual do Sassafrás, Doutor Pedrinho, Santa Catarina, Sul do Brasil. Biotemas 27: 123-129.
Valdez S (2012) Plano de manejo do Parque Estadual do Ibitiriá. Secretaria Estadual do Meio Ambiente, Porto Alegre, Rio Grande do Sul.
Wolfart MR, Da Fré M, Lucas EM, Miranda GB (2013) Mamíferos terrestres em um remanescente de Mata Atlântica, Paraná, Brasil. Biotemas 26: 111-119.
[truncated: 34 more columns]

## Sheet: Table S3
Table S3. Diet dataset. Contribution of the 83 species of medium- and large-sized mammals of the Atlantic Forest, Brazil, for each ecological function, including the number of studies used to characterize each function per species, mean values and standard deviations (SD) for each ecological function, species mean body mass (in kg; extracted from Paglia et al., 2012) and the classification of spe…
				Herbivory (folivory)				Herbivory (frugivory)								Predation
				Browsing		Grazing		Dispersal				Depredation				Vertebrates						Invertebrates
Taxon	Classification	Body mass	Studies	-	SD	-	SD	Sᵃ	SD	Lᵇ	SD	Sᵃ	SD	Lᵇ	SD	S¹	SD	M²	SD	L³	SD	-	SD
DIDELPHIMORPHIA
DIDELPHIDAE
Didelphis albiventris Lund, 1840	Resilient	1.6	5	0	0	0	0	24.6	10	4.3	1.8	0	0	0	0	20.1	7.2	0	0	0	0	51	11.7
Didelphis aurita (Wied-Neuwied, 1826)	Resilient	1.24	8	0	0	0	0	23.8	9.5	4.2	1.7	0	0	0	0	8.4	4.4	0	0	0	0	63.6	10
PILOSA
BRADYPODIDAE
Bradypus torquatus Illiger, 1811	Sensitive	6.6	7	100	0	0	0	0	0	0	0	0	0	0	0	0	0	0	0	0	0	0	0
Bradypus variegatus Schinz, 1825	Sensitive	3.9	3	100	0	0	0	0	0	0	0	0	0	0	0	0	0	0	0	0	0	0	0
MYRMECOPHAGIDAE
Myrmecophaga tridactyla Linnaeus, 1758	Sensitive	30.5	6	0	0	0	0	0	0	0	0	0	0	0	0	0	0	0	0	0	0	100	0
Tamandua tetradactyla (Linnaeus, 1758)	Resilient	5.2	5	0	0	0	0	0	0	0	0	0	0	0	0	0	0	0	0	0	0	100	0
CINGULATA
CHLAMYPHORIDAE
Cabassous tatouay (Desmarest, 1804)	Resilient	5.35	3	0	0	0	0	0	0	0	0	0	0	0	0	0	0	0	0	0	0	100	0
Cabassous unicinctus (Linnaeus, 1758)	Resilient	3.2	6	0	0	0	0	0	0	0	0	0	0	0	0	0	0	0	0	0	0	100	0
Euphractus sexcinctus (Linnaeus, 1758)	Resilient	5.4	8	13.6	9.1	0	0	28.4	9.4	0	0	0	0	0	0	3.8	4.6	0	0	0	0	54.2	11.8
Priodontes maximus (Kerr, 1792)	Sensitive	26.8	4	1.3	2.3	0	0	6.7	5.8	0	0	0	0	0	0	0	0	0	0	0	0	92	7.2
DASYPODIDAE
Dasypus hybridus (Desmarest, 1804)	Resilient	1.5	4	26	1.4	0	0	11	0.7	0	0	0	0	0	0	1.5	0.7	0	0	0	0	61.5	6.4
Dasypus novemcinctus Linnaeus, 1758	Resilient	3.65	3	0.6	0.6	0	0	5.4	7.6	0	0	0	0	0	0	1.3	1	0	0	0	0	92.7	9.2
Dasypus septemcinctus Linnaeus, 1758	Resilient	1.5	3	12.2	17.3	0	0	4.7	6.6	0	0	0	0	0	0	0	0	0	0	0	0	83.2	23.8
PERISSODACTYLA
TAPIRIIDAE
Tapirus terrestris (Linnaeus, 1758)	Sensitive	260	8	72.4	16.5	0	0	7.1	4.2	4.2	2.5	10.3	6.1	6	3.6	0	0	0	0	0	0	0	0
ARTIODACTYLA
CERVIDAE
Mazama americana (Erxleben, 1777)	Sensitive	36	4	42.3	1.5	0	0	2	0	1.4	0	31.3	0.9	22.6	0.6	0	0	0	0	0	0	0.3	0.6
Mazama bororo Duarte, 1996	Sensitive	25	4	42.3	1.5	0	0	2	0	1.4	0	31.3	0.9	22.6	0.6	0	0	0	0	0	0	0.3	0.6
Mazama gouazoubira (G. Fischer, 1814)	Resilient	21	6	85.5	5.5	3.2	4.1	0.4	0.2	0.3	0.1	6.1	2.6	4.5	1.9	0	0	0	0	0	0	0	0
Mazama nana (Hensel, 1872)	Sensitive	17.5	4	42.3	1.5	0	0	2	0	1.4	0	31.3	0.9	22.6	0.6	0	0	0	0	0	0	0.3	0.6
Ozotoceros bezoarticus (Linnaeus, 1758)	Sensitive	35	4	50	0	50	0	0	0	0	0	0	0	0	0	0	0	0	0	0	0	0	0
TAYASSUIDAE
Pecari tajacu (Linnaeus, 1758)	Sensitive	26	11	25	6.2	0	0	1.9	0.174	1.4	0.1	36.2	3.3	26.2	2.4	0.3	0.6	0	0	0	0	9	7.2
Tayassu pecari (Link, 1795)	Sensitive	35	9	29.1	14.6	0	0	1.9	0.3	1.3	0.2	35	6	25.3	4.3	0.3	0.5	0	0	0	0	7.1	4.5
PRIMATES
ATELIDAE
Alouatta belzebul (Linnaeus, 1766)	Sensitive	6.425	7	56.9	10.9	0	0	24.6	6.2	18.5	4.7	0	0	0	0	0	0	0	0	0	0	0	0
Alouatta caraya (Humboldt, 1812)	Sensitive	6	8	76.9	10.6	0	0	19.4	8.9	3.7	1.7	0	0	0	0	0	0	0	0	0	0	0	0
Alouatta guariba (Humboldt, 1812)	Resilient	5.625	11	72.4	13.1	0	0	20.8	12.7	3.1	1.9	3.2	5.3	0.5	0.8	0	0	0	0	0	0	0	0
Brachyteles arachnoides (É. Geoffroy, 1806)	Sensitive	10.75	7	61.5	17.8	0	0	28.4	15.6	8	4.4	1.6	4.6	0.5	1.3	0	0	0	0	0	0	0	0
Brachyteles hypoxanthus (Kuhl, 1820)	Sensitive	13	8	66.7	10.2	0	0	25.7	7.9	7.7	2.4	0	0	0	0	0	0	0	0	0	0	0	0
CALLITRICHIDAE
Callithrix aurita (É. Geoffroy, 1812)	Sensitive	0.4	4	0	0	0	0	29.3	8.1	0	0	0	0	0	0	0	0	0	0	0	0	70.7	8.1
Callithrix flaviceps (Thomas, 1903)	Sensitive	0.4	6	0	0	0	0	22.8	18.1	0	0	0	0	0	0	0	0	0	0	0	0	77.2	18.1
Callithrix geoffroyi (Humboldt, 1812)	Sensitive	0.29	3	0	0	0	0	48.5	2.1	0	0	0	0	0	0	0.5	0.7	0	0	0	0	51	2.8
Callithrix jacchus (Linnaeus, 1758)	Resilient	0.29	4	30.5	29	0	0	43	38.2	0	0	0	0	0	0	0.5	0.7	0	0	0	0	26	8.5
Callithrix kuhlii Coimbra-Filho, 1985	Sensitive	0.32	3	3	0	0	0	83	0	0	0	0	0	0	0	0	0	0	0	0	0	14	0
Callithrix penicillata (É. Geoffroy, 1812)	Resilient	0.25	2	0	0	0	0	52	0	0	0	0	0	0	0	0	0	0	0	0	0	48	0
Leontopithecus caissara Lorini & Persson, 1990	Sensitive	0.57	5	0	0	0	0	92	0	0	0	0	0	0	0	1	0	0	0	0	0	7	0
Leontopithecus chrysomelas (Kuhl, 1820)	Sensitive	0.6	6	15	0	0	0	71	0	0	0	0	0	0	0	0	0	0	0	0	0	14	0
Leontopithecus chrysopygus (Mikan, 1823)	Sensitive	0.62	4	23	0	0	0	68	0	0	0	0	0	0	0	0	0	0	0	0	0	9	0
Leontopithecus rosalia (Linnaeus, 1766)	Sensitive	0.6	8	0	0	0	0	85	0	0	0	0	0	0	0	0	0	0	0	0	0	15	0
CEBIDAE
Sapajus apella (Linnaeus, 1758)	Resilient	3.9	4	15.4	10	0	0	34	3.4	6	0.6	0	0	0	0	0	0	0	0	0	0	44.6	6
Sapajus flavius (Schreber, 1774)	Sensitive	2.5	3	21.3	3.2	0	0	63	14.1	0	0	0	0	2.6	2.1	1	1.4	0	0	0	0	12.2	14.4
Sapajus libidinosus (Spix, 1823)	Sensitive	2.75	4	22.3	12.9	0	0	42.8	7.3	0	0	0	0	8.3	5.8	0.2	0.4	0	0	0	0	26.3	13.6
Sapajus nigritus (Goldfuss, 1809)	Resilient	3.5	8	19.8	16.8	0	0	45	11.4	7.9	2	9.6	7.1	1.7	1.2	0.1	0.2	0	0	0	0	15.9	10.7
Sapajus robustus (Kuhl, 1820)	Sensitive	3	4	10	0	0	0	85	0	0	0	0	0	0	0	0	0	0	0	0	0	5	0
Sapajus xanthosternos (Wied-Neuwied, 1826)	Sensitive	3	4	25	0	0	0	35	0	3.5	0	0	0	0	0	0	0	0	0	0	0	36.5	0
PITHECIIDAE
Callicebus coimbrai Kobayashi & Langguth, 1999	Sensitive	1.02	5	29.3	3.8	0	0	62.1	1.3	0	0	0	0	7.3	3.2	0	0	0	0	0	0	1.3	1.9
Callicebus melanochir (Wied-Neuwied, 1820)	Sensitive	1.37	5	16.1	2.8	0	0	55.3	4.8	0	0	0	0	28.2	2.5	0	0	0	0	0	0	0.4	0.5
Callicebus nigrifrons (Spix, 1823)	Sensitive	1.3	7	31.7	13.8	0	0	45.3	1.5	0	0	0	0	14.4	15.7	0	0	0	0	0	0	8.6	3.4
Callicebus personatus (É. Geoffroy, 1812)	Sensitive	1.31	7	27.2	9.2	0	0	72.3	9.2	0	0	0	0	0	0	0	0	0	0	0	0	0.5	0.8
CARNIVORA
CANIDAE
Cerdocyon thous (Linnaeus, 1766)	Resilient	6.5	19	0	0	0	0	33.4	5.8	7.8	1.4	0	0	0	0	32.4	12.2	1.5	2.8	0.1	0.3	24.7	7.5
Chrysocyon brachyurus (Illiger, 1815)	Sensitive	25	16	0.6	2	0	0	37.4	6	8.8	1.4	0	0	0	0	40.5	8.3	5.8	3.4	0.2	0.3	6.7	4
Lycalopex gymnocercus (G. Fischer, 1814)	Resilient	4.4	7	0	0	0	0	24.1	20.5	5.6	4.8	0	0	0	0	22.6	14.8	0	0	0	0	47.7	15.6
Lycalopex vetulus (Lund, 1842)	Sensitive	4	11	0	0	0	0	16.5	13.3	3.9	3.1	0	0	0	0	7.2	6.3	0	0	0	0	72.4	20.7
Speothos venaticus (Lund, 1842)	Sensitive	6	12	0	0	0	0	2.5	3.5	0	0	0	0	0	0	24.5	20.5	68	24	0	0	5	0
FELIDAE
Leopardus guttulus (Schreber, 1775)	Resilient	2.25	11	0	0	0	0	0	0	0	0	0	0	0	0	94.4	7.6	1.4	1.7	0.2	0.8	4	7.6
Leopardus pardalis (Linnaeus, 1758)	Sensitive	9.5	14	0	0	0	0	0	0	0	0	0	0	0	0	85.8	10.9	13.7	10.5	0.5	0.6	0	0
Leopardus wiedii (Schinz, 1821)	Sensitive	6	11	0	0	0	0	0	0	0	0	0	0	0	0	90.9	8.1	5.8	7.8	0	0	3.3	6.9
Panthera onca (Linnaeus, 1758)	Sensitive	109	8	0	0	0	0	0.5	1.4	0	0	0	0	0	0	8.4	8	24.3	23.5	66.6	29.5	0.3	0.1
Puma concolor (Linnaeus, 1771)	Resilient	45	9	0	0	0	0	0	0	0	0	0	0	0	0	13.7	14.5	49.3	19.2	34.9	25.1	2.1	5.9
Puma yagouaroundi (É. Geoffroy, 1803)	Resilient	4.5	14	0	0	0	0	0	0	0	0	0	0	0	0	94.9	6.3	4.2	5.8	0.1	0.5	0.8	2.6
MEPHITIDAE
Conepatus semistriatus (Boddaert, 1785)	Resilient	2.4	4	0	0	0	0	12	0	0	0	0	0	0	0	4	0	0	0	0	0	84	0
Conepatus chinga (Molina, 1782)	Resilient	1.75	9	0	0	0	0	2.7	3.5	0	0	0	0	0	0	10.4	10	1.1	1.7	0.1	0.2	85.7	9.4
MUSTELIDAE
Eira barbara (Linnaeus, 1758)	Resilient	7	7	0	0	0	0	33.1	7.7	4.5	1	0	0	0	0	45.7	13.6	1.3	2.3	0	0	15.3	13.3
Galictis cuja (Molina, 1782)	Resilient	2	7	0	0	0	0	0	0	0	0	0	0	0	0	69.6	10.8	24.6	15.2	0.3	0.7	5.5	6.6
Galictis vittata (Schreber, 1776)	Resilient	2.55	6	0	0	0	0	0	0	0	0	0	0	0	0	87.5	17.7	12.5	17.7	0	0	0	0
Lontra longicaudis (Olfers, 1818)	Resilient	6	17	0	0	0	0	0.1	0.4	0	0	0	0	0	0	76.4	14.8	0.1	0.2	0	0	23.4	14.7
Pteronura brasiliensis (Gmelin, 1788)	Sensitive	29	7	0	0	0	0	0	0	0	0	0	0	0	0	20	0	80	0	0	0	0	0
PROCYONIDAE
Nasua nasua (Linnaeus, 1766)	Resilient	5.1	9	0	0	0	0	30.4	20.3	4.1	2.8	0	0	0	0	12.5	16.3	0	0	0	0	52.9	22.3
Potos flavus (Schreber, 1774)	Sensitive	2.6	6	6.4	5.6	0	0	76.8	0.3	13.6	0.1	0	0	0	0	0	0	0	0	0	0	3.2	5.6
Procyon cancrivorus (G. Cuvier, 1798)	Resilient	5.4	8	0	0	0	0	33.5	8	8.4	2	0	0	0	0	20.7	16.7	0.3	0.5	0	0	37.1	10.6
LAGOMORPHA
LEPORIDAE
Sylvilagus brasiliensis (Linnaeus, 1758)	Resilient	1.2	3	40	0	60	0	0	0	0	0	0	0	0	0	0	0	0	0	0	0	0	0
RODENTIA
CAVIIDAE
Cavia aperea Erxleben, 1777	Resilient	0.55	2	0	0	100	0	0	0	0	0	0	0	0	0	0	0	0	0	0	0	0	0
Cavia fulgida Wagler, 1831	Resilient	0.28	1	0	0	100	0	0	0	0	0	0	0	0	0	0	0	0	0	0	0	0	0
Cavia intermedia Cherem, Olimpio & Ximenez, 1999	Resilient	0.62	3	0	0	100	0	0	0	0	0	0	0	0	0	0	0	0	0	0	0	0	0
Cavia magna Ximenez, 1980	Resilient	0.76	2	0	0	100	0	0	0	0	0	0	0	0	0	0	0	0	0	0	0	0	0
Hydrochoerus hydrochaeris (Linnaeus, 1766)	Resilient	50	6	0	0	100	0	0	0	0	0	0	0	0	0	0	0	0	0	0	0	0	0
CUNICULIDAE
Cuniculus paca (Linnaeus, 1766)	Resilient	9.3	7	6.5	8.4	0	0	2.3	0.2	44.6	3.3	2.3	0.2	44.6	3.3	0	0	0	0	0	0	0	0
DASYPROCTIDAE
Dasyprocta azarae Lichtenstein, 1823	Sensitive	2.9	1	4.9	4.4	0	0	2.7	0.3	51.3	5.2	1.8	0.2	34.2	3.5	0	0	0	0	0	0	5.2	4.7
Dasyprocta leporina (Linnaeus, 1758)	Sensitive	5.5	4	4.9	4.4	0	0	2.7	0.3	51.3	5.2	1.8	0.2	34.2	3.5	0	0	0	0	0	0	5.2	4.7
Dasyprocta prymnolopha Wagler, 1831	Sensitive	3	1	4.9	4.4	0	0	2.7	0.3	51.3	5.2	1.8	0.2	34.2	3.5	0	0	0	0	0	0	5.2	4.7
ECHIMYIDAE
Myocastor coypus (Molina, 1782)	Resilient	1	6	0	0	100	0	0	0	0	0	0	0	0	0	0	0	0	0	0	0	0	0
ERETHIZONTIDAE
Chaetomys subspinosus (Olfers, 1818)	Sensitive	1.3	5	99.7	0.5	0	0	0	0	0	0	0.3	0.5	0	0	0	0	0	0	0	0	0	0
Coendou insidious (Lichtenstein, 1818)	Resilient	1.27	2	100	0	0	0	0	0	0	0	0	0	0	0	0	0	0	0	0	0	0	0
Coendou prehensilis (Linnaeus, 1758)	Resilient	4.2	5	43	0	0	0	0	0	0	0	2.9	0	54.2	0	0	0	0	0	0	0	0	0
Coendou spinosus (F. Cuvier, 1823)	Resilient	1.8	4	100	0	0	0	0	0	0	0	0	0	0	0	0	0	0	0	0	0	0	0
SCIURIDAE
Guerlinguetus brasiliensis (Thomas, 1901)	Resilient	0.17	8	29.1	14.6	0	0	1.9	0.3	1.3	0.2	35	6	25.3	4.3	0.3	0.5	0	0	0	0	7.1	4.5
References (by species)
DIDELPHIMORPHIA
DIDELPHIDAE
Didelphis albiventris
Cáceres NC, Machado AF (2013) Spatial, dietary and temporal niche dimensions in ecological segregation of two sympatric, congeneric marsupial species. Open Ecol J 6:10-23.
Cáceres NC (2002) Food habits and seed dispersal by the white-eared opossum, Didelphis albiventris, in southern Brazil. Stud Neotrop Fauna E 37: 97-104.
Cantor M, Ferreira LA, Silva WR, Setz EZF (2010) Potential seed dispersal by Didelphis albiventris (Marsupialia, Didelphidae) in highly disturbed environment. Biota Neotrop 10: 45-51.
Silva AR, Forneck ED, Bordignon SAL, Cademartori CV (2014) Diet of Didelphis albiventris Lund, 1840 (Didelphimorphia, Didelphidae) in two periurban areas in southern Brazil. Acta Sci Biol Sci 36: 241-247.
Sohn N (2006) Estudo da dieta de gambá-de-orelha-branca (Didelphis albiventris Lund, 1841) em uma área urbana de Curitiba-PR (Mammalia-marsupialia). Monografia, Universidade Federal do Paraná, Curitiba, Paraná.
Didelphis aurita
Cáceres NC (2004) Diet of three didelphid marsupials (Mammalia, Didelphimorphia) in southern Brazil. Mammal Biol 69: 430-433.
Cáceres NC, Monteiro-Filho EL (2001) Food habits, home range and activity of Didelphis aurita (Mammalia, Marsupialia) in a forest fragment of southern Brazil. Stud Neotrop Fauna E 36: 85-92.
Cáceres NC, Machado AF (2013) Spatial, dietary and temporal niche dimensions in ecological segregation of two sympatric, congeneric marsupial species. Open Ecol J 6: 10-23.
Carvalho FMV, Fernandez FAZ, Nessimian JL (2005) Food habits of sympatric opossums coexisting in small Atlantic Forest fragments in Brazil. Mammal Biol 70: 366-375.
Casella J (2011) Diet of Didelphis aurita and Micoureus paraguayanus and the fruit availability in a semideciduous Atlantic forest in Southern Brazil. Neotrop Biol Conserv 6: 85-93.
Ceotto P, Finotti R, Santori R, Cerqueira R (2009) Diet variation of the marsupials Didelphys aurita and Philander frenatus (Didelphimorphia, Didelphidae) in a rural area of Rio de Janeiro state, Brazil. Mastozool Neotrop 16: 49-58.
Leite YLR, Costa LP, Stallings JR (1996) Diet and vertical space use of three sympatric opossums in a Brazilian Atlantic forest reserve. J Trop Ecol 12: 435-440.
Santori RT, Moraes DA, Cerqueira R (1995) Diet composition of Metachirus nudicaudatus and Didelphis aurita (Marsupialia, Didelphoidea) in southeastern Brazil. Mammalia 59: 511-516.
PILOSA
BRADYPODIDAE
Bradypus torquatus
Cassano CR (2006) Ecologia e conservação da preguiça-de-coleira (Bradypus torquatus Illiger, 1811) no sul da Bahia. Dissertação de mestrado, Universidade Estadual de Santa Cruz, Ilhéus, Bahia.
Chiarello A, Moraes-Barros N (2014) Bradypus torquatus. The IUCN Red List of Threatened Species 2014: e.T3036A47436575. http://dx.doi.org/10.2305/IUCN.UK.2014-1.RLTS.T3036A47436575.en.
Chiarello AG (1998a) Activity budgets and raging patterns of the Atlantic forest maned sloth Bradypus torquatus (Xenarthra: Bradypodidae). J Zool 246: 1-10.
Chiarello AG (1998b) Diet of the Atlantic forest maned sloth Bradypus torquatus (Xenarthra: Bradypodidae). J Zool 246:11-19.
Chiarello AG (2008) Sloth ecology: an overview of field studies. In Vizcaíno SF, Loughry WJ (eds) The biology of the Xenarthra. University Press of Florida, Gainesville. pp. 269-280.
Chiarello AG, Chivers DJ, Bassi C, Maciel MA, Moreira L, Bazzalo M (2004) A translocation experiment for the conservation of maned sloths, Bradypus torquatus (Xenarthra: Bradypodidae). Biol Conserv 118: 421–430.
Hayssen V (2009) Bradypus torquatus (Pilosa: Bradypodidae). Mamm Species 829: 1-5.
Bradypus variegatus
Chiarello AG (2008) Sloth ecology: an overview of field studies. In Vizcaíno SF, Loughry WJ (eds) The biology of the Xenarthra. University Press of Florida, Gainesville. pp. 269-280.
Moraes-Barros N, Chiarello A, Plese T (2014) Bradypus variegatus. The IUCN Red List of Threatened Species 2014: e.T3038A47437046. http://dx.doi.org/10.2305/IUCN.UK.2014-1.RLTS.T3038A47437046.en.
Urbani B, Bosque C (2007) Feeding ecology and postural behaviour of the three-toed sloth (Bradypus variegatus flaccidus) in northern Venezuela. Mamm Biol 72: 321-329.
MYRMECOPHAGIDAE
Myrmecophaga trydactyla
Drumond MA (1992) Padrões de forrageamento do tamanduá-bandeira (Myrmecophaga tridactyla) no Parque Nacional da Serra da Canastra: dieta, comportamento alimentar e efeito de queimadas. Dissertação, Universidade Federal de Minas Gerais.
Medri IM, Mourão GDM, Harada AY (2003) Dieta de tamanduá-bandeira (Myrmecophaga tridactyla) no Pantanal da Nhecolândia, Brasil. Edentata 5: 29-34.
Miranda F, Bertassoni A, Abba AM (2014) Myrmecophaga tridactyla. The IUCN Red List of Threatened Species 2014: e.T14224A47441961. http://dx.doi.org/10.2305/IUCN.UK.2014-1.RLTS.T14224A47441961.en.
Nowak RM (1999) Walker's Mammals of the World (Vol. 1). JHU Press.
Redford KH (1985) Feeding and food preference in captive and wild giant anteaters (Mymecophaga tridactyla). J Zool 205: 559–572.
Rodrigues FH, Medri IM, Miranda GH, Camilo-Alves C, Mourão G (2008) Anteater behavior and ecology. In Vizcaíno SF, Loughry WJ (eds) The biology of the Xenarthra. pp. 257-68.
Tamandua tetradactyla
Emmons LH, Feer F (1997) Neotropical rainforest mammals: a field guide. University of Chicago Press, Chicago.
Hayssen V (2011) Tamandua tetradactyla (Pilosa: Myrmecophagidae). Mamm Species 43: 64-74.
Miranda F, Fallabrino A, Arteaga M, Tirira DG, Meritt DA, Superina M (2014) Tamandua tetradactyla. The IUCN Red List of Threatened Species 2014: e.T21350A47442916. http://dx.doi.org/10.2305/IUCN.UK.2014-1.RLTS.T21350A47442916.en.
Montgomery GG (1986) Impact of vermilinguas (Cydopes, Tamandua: Xenarthtra = Edentata) on arboreal ant populations. In Montgomery GG (ed) The evolution and ecology of armadillos, sloths, and vermilinguas, Washington DC, Smithsonian Institution Press. pp. 351–363.
Silveira ED (1968) Notas sobre a história natural do tamanduá mirim (Tamandua tetradactyla chiriquensis J.A. Allen 1904, Myrmecophagidae), com referências à fauna do Istmo do Panamá. Vellozia 6: 9-27.
CINGULATA
CHLAMYPHORIDAE
Cabassous tatouay
Gonzalez E, Abba AM (2014) Cabassous tatouay. The IUCN Red List of Threatened Species 2014: e.T3414A47437737. http://dx.doi.org/10.2305/IUCN.UK.2014-1.RLTS.T3414A47437737.en.
Redford KH (1985) Food habits of armadillos (Xenarthra: Dasypodidae). In Montgomery GG (ed) The evolution and ecology of armadillos, sloths, and vermilinguas (No. 599.31 EVO).
Redford KH (1994) The edentates of the Cerrado. Edentata 1: 4-10.
Cabassous unicinctus
Anacleto TCS (2007) Food habits of four armadillo species in the Cerrado area, Mato Grosso, Brazil. Zool Stud 46: 529-537.
Anacleto TCS, Tomas WM, Superina M (2014) Cabassous unicinctus. The IUCN Red List of Threatened Species 2014: e.T3415A47437949. http://dx.doi.org/10.2305/IUCN.UK.2014-1.RLTS.T3415A47437949.en.
Bonato V (2002) Ecologia e história natural de tatus do Cerrado de Itirapina, São Paulo (Xenarthra: Dasypodidae). Dissertação, Universidade Estadual de Campinas, Campinas.
Bonato V, Martins EG, Machado G, Da-Silva CQ, Reis SF (2008) Ecology of the armadillos Cabassous unicinctus and Euphractus sexcinctus (Cingulata: Dasypodidae) in a Brazilian Cerrado. J Mamm 89: 168-174.
Redford KH (1985) Food habits of armadillos (Xenarthra: Dasypodidae). In Montgomery GG (ed) The evolution and ecology of armadillos, sloths, and vermilinguas (No. 599.31 EVO).
Redford KH (1994) The edentates of the Cerrado. Edentata 1: 4-10.
Euphractus sexcinctus
Abba AM, Lima E, Superina M (2014) Euphractus sexcinctus. The IUCN Red List of Threatened Species 2014: e.T8306A47441708. http://dx.doi.org/10.2305/IUCN.UK.2014-1.RLTS.T8306A47441708.en.
Anacleto TCS (2007) Food habits of four armadillo species in the Cerrado area, Mato Grosso, Brazil. Zool Stud 46: 529-537.
Bonato V (2002) Ecologia e história natural de tatus do Cerrado de Itirapina, São Paulo (Xenarthra: Dasypodidae). Dissertação, Universidade Estadual de Campinas, Campinas.
Bonato V, Martins EG, Machado G, Da-Silva CQ, Reis SF (2008) Ecology of the armadillos Cabassous unicinctus and Euphractus sexcinctus (Cingulata: Dasypodidae) in a Brazilian Cerrado. J Mamm 89: 168-174.
Dalponte JC, Tavares-Filho JA (2004) Diet of the yellow armadillo, Euphractus sexcinctus, in south-central Brazil. Edentata 6: 37-41.
Medri I (2008) Ecologia e história natural do tatu-peba, Euphractus sexcinctus (Linnaeus, 1758), no Pantanal da Nhecolândia, Mato Grosso do Sul. Tese, Universidade Federal de Brasília, Brasília.
Schaller GB (1983) Mammals and their biomass on a Brazilian ranch. Arq Zool 31:1-36.
Zambrini ACV (2015) Ecologia alimentar de tatu-peba, Euphractus sexcinctus (Linnaeus, 1758), na Fazenda Nhumirim, Pantanal da Nhecolância, MS. Monografia, Universidade Estadual Paulista “Júlio de Mesquita Filho”, Rio Claro.
Priodontes maximus
Anacleto TCS, Marinho-Filho J (2001) Hábito alimentar do tatu-canastra (Xenarthra, Dasypodidae) em uma área de cerrado do Brasil Central. Rev Bras Zool 18: 681-688.
Anacleto TCS (2007) Food habits of four armadillo species in the Cerrado area, Mato Grosso, Brazil. Zool Stud 46: 529-537.
Anacleto TCS, Miranda F, Medri I, Cuellar E, Abba AM, Superina M (2014) Priodontes maximus. The IUCN Red List of Threatened Species 2014: e.T18144A47442343. http://dx.doi.org/10.2305/IUCN.UK.2014-1.RLTS.T18144A47442343.en.
Leite Pitman R, Powell G, Cruz D, Escobedo M, Escobar K, Vilca V, Mendoza A (2004) Habitat use and activity of the giant armadillo (Priodontes maximus): Preliminary data from southeastern Peru. Society for Conservation Biology Annual Meeting, New York, USA.
DASYPODIDAE
Dasypus hybridus
Abba AM, Cassini MH (2010) Ecological differences between two sympatric species of armadillos (Xenarthra, Mammalia) in a temperate region of Argentina. Acta Theriol 55: 35-44.
Abba AM, Gonzalez E (2014) Dasypus hybridus. The IUCN Red List of Threatened Species 2014: e.T6288A47440329. http://dx.doi.org/10.2305/IUCN.UK.2014-1.RLTS.T6288A47440329.en.
Abba AM, Cassini GH, Galliari FC (2011) Nuevos aportes a la historia natural de la mulita pampeana Dasypus hybridus (Mammalia, Dasypodidae). Iheringia, Sér Zool 101: 325-335.
Eisenberg JF, Redford KH, Reid FA (1999) Vol. 3: The Central Neotropics: Ecuador, Peru, Bolivia, Brazil. University of Chicago Press, Chicago.
Dasypus novemcinctus
Loughry J, McDonough C, Abba AM (2014) Dasypus novemcinctus. The IUCN Red List of Threatened Species 2014: e.T6290A47440785. http://dx.doi.org/10.2305/IUCN.UK.2014-1.RLTS.T6290A47440785.en.
Sikes RS, Heidt GA, Elrod DA (1990) Seasonal diets of the nine-banded armadillo (Dasypus novemcinctus) in a northern part of its range. Am Midl Nat 123: 383-389.
Whitaker Jr. JO, Ruckdeschel C, Bakken L (2012) Food of the armadillo Dasypus novemcinctus L. from Cumberland Island, GA. Southeast Nat 11: 487-506.
Dasypus septemcinctus
Anacleto TCS, Smith P, Abba AM, Superina M (2014) Dasypus septemcinctus. The IUCN Red List of Threatened Species 2014: e.T6293A47441509. http://dx.doi.org/10.2305/IUCN.UK.2014-1.RLTS.T6293A47441509.en.
Redford K, Eisenberg J (1989) Mammals of the Neotropics, Volume 2, The Southern Cone: Chile, Argentina, Uruguay, Paraguay. University Chicago Press, Chicago.
Silva KFM (2006) Ecologia de uma população de tatu-galinha (Dasypus septemcinctus) no cerrado do Brasil central. Dissertação, Universidade de Brasília, Brasília.
PERISSODACTYLA
TAPIRIIDAE
Tapirus terrestris
Bachand M, Trudel OC, Ansseau C, Cortez JA (2009) Dieta de Tapirus terrestris Linnaeus em um fragmento de Mata Atlântica do Nordeste do Brasil. Rev Bras Bioc 7: 188-194.
Chalukian SC, Bustos MS, Lizárraga RL (2013) Diet of lowland tapir (Tapirus terrestris) in El Rey National Park, Salta, Argentina. Integr Zool 8: 48-56.
Naveda A, Thoisy B, Richard-Hansen C, Torres DA, Salas L, Wallance R, Chalukian S, Bustos S (2008) Tapirus terrestris. The IUCN Red List of Threatened Species 2008: e.T21474A9285933. http://dx.doi.org/10.2305/IUCN.UK.2008.RLTS.T21474A9285933.en.
Prado HM, Murrieta RSS, Adams C, Brondizio ES (2013) Complementary viewpoints: Scientific and local knowledge of ungulates in the Brazilian Atlantic forest. J Ethnobiol 33: 180-202.
Sallenave A (2009) Frugivory and seed dispersal by tapirs (Tapirus terrestris) in the Atlantic forest of NE Argentina. Proceedings of the 10th International Mammalogical Congress, Mendoza, Argentina.
Seibert JB (2015) Padrão de frugivoria por Tapirus terrestris na Mata Atlântica do norte do Espírito Santo, Brasil. Dissertação, Universidade Federal do Espírito Santo.
Talamoni AS, Assis MA (2009) Feeding habit of the Brazilian tapir, Tapirus terrestris (Perissodactyla: Tapiridae) in a vegetation transition zone in south-eastern Brazil. Zoologia 26: 251-254.
Tófoli CFD (2006) Frugivoria e dispersão de sementes por Tapirus terrestris (Linnaeus, 1758) na paisagem fragmentada do Pontal do Paranapanema, São Paulo. Dissertação, Universidade de São Paulo, São Paulo.
ARTIODACTYLA
CERVIDAE
Mazama americana
Duarte JMB, Vogliotti A (2016) Mazama americana. The IUCN Red List of Threatened Species 2016: e.T29619A22154827. http://dx.doi.org/10.2305/IUCN.UK.2016-1.RLTS.T29619A22154827.en.
Duarte JMB, Vogliotti A, Zanetti ES, Oliveira ML, Tiepolo LM, Rodrigues LF, Almeida LB (2012) Avaliação do risco de extinção do veado-mateiro Mazama americana Erxleben, 1777, no Brasil. Biodivers Bras 1: 33-41.
Gayot M, Henry O, Dubost G, Sabatier D (2004) Comparative diet of the two forest cervids of the genus Mazama in French Guiana. J Trop Ecol 20: 31-43.
Prado HM, Murrieta RSS, Adams C, Brondizio ES (2013) Complementary viewpoints: Scientific and local knowledge of ungulates in the Brazilian Atlantic forest. J Ethnobiol 33: 180-202.
Mazama bororo
Duarte JMB, Reis ML (2012) Plano de ação nacional para a conservação dos cervídeos ameaçados de Extinção. Brasília (Brazil): Instituto Chico Mendes de Conservação da Biodiversidade, Icmbio.
Duarte JMB, Vogliotti A, Zanetti ES, Oliveira ML, Tiepolo LM, Rodrigues LF, Almeida LB (2012). Avaliação do Risco de Extinção do veado-mateiro-pequeno Mazama bororo Duarte, 1996, no Brasil. Biodivers Bras 3:42-49.
Vogliotti A (2003) História natural de Mazama bororo (Artiodactyla; Cervidae) através de etnozoologia, monitoramento fotográfico e rádio-telemetria. Dissertação, Universidade de São Paulo, Piracicaba.
Vogliotti A, Oliveira ML, Duarte JMB (2016) Mazama bororo. The IUCN Red List of Threatened Species 2016: e.T41023A22155086.
Mazama gouazoubira
Black-Decima PA, Vogliotti A (2016) Mazama gouazoubira. The IUCN Red List of Threatened Species 2016: e.T29620A22154584. http://dx.doi.org/10.2305/IUCN.UK.2016-2.RLTS.T29620A22154584.en.
Bonifácio KM, Schiavetti A, Freire EMX (2015) Conhecimento ecológico local sobre o veado, Mazama gouazoubira (G. Fischer, 1984), por moradores do entorno de uma área protegida do semiárido brasileiro. Rev Bras Cienc Amb 38: 78-94.
Gayot M, Henry O, Dubost G, Sabatier D (2004) Comparative diet of the two forest cervids of the genus Mazama in French Guiana. J Trop Ecol 20: 31-43.
Pinder L (2004) Niche partitioning among gray brocket deer, Pampas deer, and cattle in the Pantanal of Brazil. In Silvius KM, Bodmer RE, Fragoso JMV (eds) People in nature: wildlife conservation in South and Central America. Columbia University Press, New York. pp. 257-270
Prado HM, Murrieta RSS, Adams C, Brondizio ES (2013) Complementary viewpoints: Scientific and local knowledge of ungulates in the Brazilian Atlantic forest. J Ethnobiol 33: 180-202.
Richard E, Juliá JP (2001) Diet of Mazama gouazoubira (Mammalia, Cervidae) in a secondary environment of Yungas, Argentina. Iheringia, Sér Zool 90: 147-156.
Mazama nana
Duarte JMB, Reis ML (2012) Plano de ação nacional para a conservação dos cervídeos ameaçados de Extinção. Brasília (Brazil): Instituto Chico Mendes de Conservação da Biodiversidade, Icmbio.
Duarte JMB, Vogliotti A, Cartes JL, Oliveira ML (2015) Mazama nana. The IUCN Red List of Threatened Species 2015: e.T29621A22154379. http://dx.doi.org/10.2305/IUCN.UK.2015-4.RLTS.T29621A22154379.en.
Duarte JMB, Vogliotti A, Zanetti ES, Oliveira ML, Tiepolo LM, Rodrigues LF, Almeida LB (2012). Avaliação do Risco de Extinção do veado-mateiro-pequeno Mazama bororo Duarte, 1996, no Brasil. Biodivers Bras 3: 42-49.
Vogliotti A (2008) Partição de habitats entre os cervídeos no Parque Nacional do Iguaçu. Tese, Universidade de São Paulo, Piracicaba.
Ozotoceros bezoarticus
Cosse M, González S, Gimenez-Dixon M (2009) Feeding ecology of Ozotoceros bezoarticus: conservation implicationsin Uruguay. Iheringia, Sér Zool 99: 158-164.
González S, Jackson III JJ, Merino ML (2016) Ozotoceros bezoarticus. The IUCN Red List of Threatened Species 2016: e.T15803A22160030. http://dx.doi.org/10.2305/IUCN.UK.2016-1.RLTS.T15803A22160030.en.
Jackson JE (1987) Ozotoceros bezoarticus. Mammalian Species Archive 295:1-5.
Rodrigues FHG (1996) História natural e biologia comportamental do veado campeiro (Ozotoceros bezoarticus) em cerrado do Brasil central. Dissertação, Universidade Estadual de Campinas, Campinas.
TAYASSUIDAE
Pecari tajacu
Beck H (2005) Seed predation and dispersal by peccaries throughout the Neotropics and its consequences: a review and synthesis In Forget PM, Lambert JE, Hulme PE, Vander Wall SB (eds) Seed fate: Predation, dispersal and seedling sstablishment CABI Publishing, Wallingford, UK. pp. 77-115.
Beck H (2006) A review of peccary-palm interactions and their ecological ramifications across the Neotropics. J Mamm 87: 519-530
Bodmer RE (1989) Ungulate biomass in relation to feeding strategy within Amazonian forest Oecologia 81: 547-500
Bodmer RE (1991) Influence of digestive morphology on resource partitioning in Amazonian ungulates Oecologia 85: 361-365
Desbiez A (2007) Wildlife conservation in the Pantanal: Habitat alteration, invasive species and bushmeat hunting Tese, University of Kent.
Desbiez ALJ, Keuroghlian A (2009) Can bite force be used as a basis for niche separation between native peccaries and introduced feral pigs in the Brazilian Pantanal? Mammalia 73: 369-372.
Desbiez ALJ, Keuroghlian A, Beisiegel BM, Medici EP, Gatti A, Pontes ARM, Campos CB, Tófoli CF, Moraes Jr. EA, Azevedo FC, Pinho GM, Cordeiro JLP, Santos Jr. TS, Morais AA, Mangini PR, Flesher K, Rodrigues LF, Almeida LB (2012) Avaliação do risco de extinção do cateto Pecari tajacu Linnaeus, 1758, no Brasil. Biodivers Bras 1: 74-83
Desbiez ALJ, Santos SA, Keuroghlian A, Bodmer RE (2009) Niche partitioning among white-lipped peccaries (Tayassu pecari), collared peccaries (Pecari tajacu), and feral pigs (Sus scrofa). J Mamm 90: 119-128.
Gongora J, Reyna-Hurtado R, Beck H, Taber A, Altrichter M, Keuroghlian A (2011) Pecari tajacu. The IUCN Red List of Threatened Species 2011: e.T41777A10562361. http://dx.doi.org/10.2305/IUCN.UK.2011-2.RLTS.T41777A10562361.en.
Keuroghlian A, Eaton DP (2008) Fruit availability and peccary frugivory in an isolated Atlantic forest fragment: effects on peccary ranging behavior and habitat use. Biotropica 40: 62-70.
Terborgh J (1988) The big things that run the world - a sequel to E. O. Wilson. Conserv Biol 2: 402-403.
Tayassu pecari
Bodmer RE (1991) Influence of digestive morphology on resource partitioning in Amazonian ungulates. Oecologia 85:361-365.
Desbiez ALJ, Keuroghlian A (2009a) Can bite force be used as a basis for niche separation between native peccaries and introduced feral pigs in the Brazilian Pantanal? Mammalia 73: 369-372.
Desbiez ALJ, Santos SA, Keuroghlian A, Bodmer RE (2009b) Niche partitioning among white-lipped peccaries (Tayassu pecari), collared peccaries (Pecari tajacu), and feral pigs (Sus scrofa). J Mamm 90: 119-128.
Keuroghlian A, Eaton DP (2008) Importance of rare habitats and riparian zones in a tropical forest fragment: preferential use by Tayassu pecari, a wide-ranging frugivore. J Zool 275: 283-293.
Keuroghlian A, Eaton DP (2009) Removal of palms fruits and ecosystem engineering in palms stands by white-lipped peccaries (Tayassu pecari) and other frugivores in an isolated Atlantic Forest fragment. Biodivers Conserv 18: 1733-1750.
Keuroghlian A, Desbiez ALJ, Beisiegel BM, Medici EP, Gatti A, Pontes ARM, Campos CB, Tófoli CF, Moraes Jr. EA, Azevedo FC, Pinho GM, Cordeiro JLP, Santos Jr. TS, Morais AA, Mangini PR, Flesher K, Rodrigues LF, Almeida LB (2012) Avaliação do risco de extinção do queixada Tayassu pecari Link, 1795, no Brasil. Biodivers Bras 1: 84-102.
Keuroghlian A, Eaton DP, Desbiez ALJ (2009) The response of a landscape species, white-lipped peccaries, to seasonal resource fluctuations in a tropical wetland, the Brazilian Pantanal. Int J Biodivers Conserv 1: 87-97.
Kiltie RA, Terborgh J (1983) Observation on the behavior of Rain Forest peccaries in Peru: why do ehite-lipped peccaries form heds? Z Tierpsychol 62: 241-255.
Terborgh J (1988) The big things that run the world - a sequel to E O Wilson Conservation Biology. Conserv Biol 2: 402-403.
PRIMATES
ATELIDAE
Alouatta belzebul
Bonvicino CR (1989) Ecologia e comportamento de Alouatta belzebul (Primates: Cebidae) na mata Atlantica. Rev Nordestina Biol 6: 149-179.
Pina ALCB (1999) Dinâmica sócio-ecológica em uma população de guaribas-das-mãos-vermelhas (Alouatta belzebul) na Estação Científica Ferreira Penna, Pará. Dissertação, Universidade Federal do Pará, Belém.
Pinto AC, Ramos CA, Carvalho O (2003) Activity patterns and diet of the howler monkey Alouatta belzebul in areas of logged and unlogged forest in Eastern Amazonia. Anim Biodivers Conserv 26: 39-49.
Pinto LP, Setz EZ (2004) Diet of Alouatta belzebul discolor in an Amazonian rain forest of Northern Mato Grosso State, Brazil. Int J Primatol 25: 1197-1211.
Souza LL, Ferrari SF, Costa ML, Kern DC (2002) Geophagy as a correlate of folivory in red-handed howler monkeys (Alouatta belzebul) from eastern Brazilian Amazonia. J Chem Ecol 28: 1613-1621.
Souza SP (2005) Ecologia e Conservação de Alouatta belzebul belzebul (Primates, Atelidae) na Paraíba, Brasil. Tese, Universidade Federal de Minas Gerais, Belo Horizonte.
Veiga LM, Kierulff C, Oliveira MM (2008) Alouatta belzebul. The IUCN Red List of Threatened Species 2008: e.T39957A10298051. http://dx.doi.org/10.2305/IUCN.UK.2008.RLTS.T39957A10298051.en.
Alouatta caraya
Bicca-Marques JC, Calegaro-Marques, C (1994) Activity budget and diet of Alouatta caraya: an age-sex analysis. Folia Primatol 63: 216-220.
Bravo SP, Sallenave A (2003) Foraging behavior and activity patterns of Alouatta caraya in the northeastern Argentinean flooded forest. Int J Primatol 24: 825-846.
Crockett CM (1998) Conservation biology of the genus Alouatta. Int J Primatol 19: 549-578.
Fernandez-Duque E, Wallace RB, Rylands AB (2008) Alouatta caraya The IUCN Red List of Threatened Species 2008: e.T41545A10496784. http://dx.doi.org/10.2305/IUCN.UK.2008.RLTS.T41545A10496784.en.
Ludwig G, Aguiar LM, Svoboda WK, Hilst CL, Navarro IT, Vitule JR, Passos FC (2008) Comparison of the diet of Alouatta caraya (Primates: Atelidae) between a riparian island and mainland on the Upper Parana River, southern Brazil. Rev Bras Zool 25: 419-426.
Prates HM, Bicca-Marques JC (2008) Age-sex analysis of activity budget, diet, and positional behavior in Alouatta caraya in an orchard forest. Int J Primatol 29: 703-715.
Rímoli AO, Valdivino EM, Rímoli J, Ferrari SF (2008) Behavior patterns of a group of black howler monkeys Alouatta caraya (Humboldt, 1812) in a forest fragment in Terenos, Mato Grosso do Sul: a seasonal analysis. In Rímoli J, Ferrari SF (eds) A primatologia no Brasil 9. Sociedade Brasileira de Primatologia, Biología Geral e Experimental—UFS, Aracaju, Brazil.
Rímoli J, Nantes RS, Lázaro Jr. AÉ (2012) Diet and activity patterns of black howler monkeys Alouatta caraya (Humboldt, 1812, Primates, Atelidae) in ecotone Cerrado-Pantanal in the left bank of Aquidauana River, Mato Grosso do Sul, Brazil. Oecologia Australis 16: 933-948.
Alouatta guariba
Aguiar LM, Reis NR, Ludwig G, Rocha VJ (2003) Dieta, área de vida, vocalizações e estimativas populacionais de Alouatta guariba em um remanescente florestal no norte do Estado do Paraná. Neotrop Primates 11:78-86.
Chiarello AG (1994) Diet of the brown howler monkey Alouatta fusca in a semi-deciduous forest fragment of southeastern Brazil. Primates 35: 25-34.
Crockett CM (1987) Diet, dimorphism and demography: Perspectives from howlers to hominids. IN Kizney WG (ed) The evolution of human behavior: Primate models. State University of New York Press, New York. pp. 115-135.
Kasecker TP (2004) Dieta de um grupo de bugios-ruivos, Alouatta guariba (Humboldt, 1812), em um fragmento de mata com araucárias, em São José dos Pinhas-PR. Monografia, Universidade Federal do Paraná, Curitiba.
Koch F (2008) Dieta e comportamento de um grupo de Alouatta guariba clamitans Cabrera, 1940: uma relação de causa e efeito? Dissertação, Pontifícia Universidade Católica do Rio Grande do Sul, Porto Alegre.
Martins CS (1997) Uso de habitat pelo bugio, Alouatta fusca clamitans, em um fragmento florestal em Lençóis Paulista-SP. Dissertação, Universidade Estadual de Campinas, Campinas.
Martins MM (2008) Fruit diet of Alouatta guariba and Brachyteles arachnoides in Southeastern Brazil: comparison of fruit type, color, and seed size. Primates 49: 1-8.
Mendes SL (1985) Uso do espaço, padrões de atividades diárias e organização social de Alouatta fusca (Primates, Cebidae) em Caratinga, MG. Dissertação, Universidade de Brasília, Brasília.
Mendes SL, Rylands AB, Kierulff MCM, Oliveira MM (2008) Alouatta guariba The IUCN Red List of Threatened Species 2008: e.T39916A10284881. http://dx.doi.org/10.2305/IUCN.UK.2008.RLTS.T39916A10284881.en.
Miranda JMD, Passos, FC (2004) Hábito alimentar de Alouatta guariba (Humboldt) (Primates, Atelidae) em Floresta de Araucária, Paraná, Brasil. Rev Bras Zool 21: 821-826.
Santos CZD (2006) Dieta e dispersão de sementes por bugio-ruivo Alouatta clamitans Cabrera, 1940 em um fragmento de floresta ombrófila mista, São José dos Pinhais, PR (Primates-Atelidae). Monografia, Universidade Federal do Paraná, Curitiba.
Brachyteles arachnoides
Azevedo-Lopes MAO (2000) Ecologia e comportamento do mono-carvoeiro do sul (Brachyteles arachnoides) na Fazenda São Francisco do Tietê (SP): contribuindo para uma estratégia integrada de conservação do gênero. Dissertação, Universidade Federal do Pará, Belém.
Carvalho Jr. O, Ferrari SF, Strier KB (2004) Diet of a muriqui group (Brachyteles arachnoides) in continuous primary forest. Primates 45: 201-204.
Martins MM (2005) The southern muriqui, Brachyteles arachnoides: ecology of a population in a semideciduous forest fragment. Neotrop Primates 13: 61-65.
Mendes SL, Oliveira MM, Mittermeier RA, Rylands AB (2008) Brachyteles arachnoides. The IUCN Red List of Threatened Species 2008: e.T2993A9529160. http://dx.doi.org/10.2305/IUCN.UK.2008.RLTS.T2993A9529160.en.
Milton K (1984) Habitat, diet, and activity patterns of free-ranging woolly spider monkeys (Brachyteles arachnoides E. Geoffroy 1806). Int J Primatol 5: 491-514.
Petroni LM (2000) Caracterização da área de uso e dieta do mono-carvoeiro (Brachyteles arachnoides, Cebidae-Primates) na Mata Atlântica, Serra de Paranapiacaba, SP. Tese, Universidade de São Paulo, São Paulo.
Strier KB (1991) Diet in one group of woolly spider monkeys, or muriquis (Brachyteles arachnoides). Am J Primatol 23: 113-126.
Talebi M, Bastos A, Lee PC (2005) Diet of southern muriquis in continuous Brazilian Atlantic Forest. Int J Primatol 26: 1175-1187.
Brachyteles hypoxanthus
Lemos de Sá RM (1988) Situação de uma população de mono-carvoeiro, Brachyteles arachnoides, em fragmento de Mata Atlântica (MG), e implicações para sua conservação. Dissertação, Universidade de Brasília, Brasília.
Machado FF (2012) Dieta de um grupo de muriquis-do-norte, Brachyteles hypoxanthus (Kuhl, 1820) (Primates Atelidae) em um fragmento florestal de Santa Maria de Jetibá, ES, Brasil. Dissertação, Universidade Federal do Espírito Santo, Vitória.
Mendes SL, Oliveira MM, Mittermeier RA, Rylands AB (2008) Brachyteles hypoxanthus. The IUCN Red List of Threatened Species 2008: e.T2994A9529636. http://dx.doi.org/10.2305/IUCN.UK.2008.RLTS.T2994A9529636.en.
Moreira LS (2008) Socioecologia de Muriquis-do-Norte (Brachyteles hypoxanthus) no Parque Estadual Serra do Brigadeiro, MG. Dissertação, Universidade Federal de Viçosas, Viçosas.
Mourthé IMC (2006) A ecologia do forrageamento do muriqui do norte (Brachyteles hypoxanthus, Kuhl, 1820). Dissertação, Universidade Federal de Minas Gerais, Belo Horizonte.
Nogueira DF, Ferraz DS, Melo FR (2009) Situação atual do muriqui-do-norte - Brachyteles hypoxanthus Kuhl, (1820) no entorno do Parque Estadual do Ibitipoca, Lima Duarte, Minas Gerais. MG Biota 1: 4-17.
Rımoli J, Ades C (1997) Estratégias de forrageamento de um grupo de muriquis (Brachyteles arachnoides, Primates, Cebidae) da Estação Biológica de Caratinga-MG. A Primatologia no Brasil 5: 39-57.
CALLITRICHIDAE
Callithrix aurita
Corrêa HKM, Coutinho PE, Ferrari SF (2000) Between‐year differences in the feeding ecology of highland marmosets (Callithrix aurita and Callithrix flaviceps) in south‐eastern Brazil. J Zool 252: 421-427.
Ferrari SF, Kátia H, Corrêa M, Coutinho, PE (1996) Ecology of the “southern” marmosets (Callithrix aurita and Callithrix flaviceps). In Norconk M, Rosenberger AL, Garber PA (eds) Adaptive radiations of neotropical primates. Springer US. pp. 157-171.
Martins MM, Setz EZ (2000) Diet of buffy tufted-eared marmosets (Callithrix aurita) in a forest fragment in southeastern Brazil. Int J Primatol 21: 467-476.
Rylands AB, Kierulff MCM, Mendes SL, Oliveira MM (2008) Callithrix aurita The IUCN Red List of Threatened Species 2008: e.T3570A9949843. http://dx.doi.org/10.2305/IUCN.UK.2008.RLTS.T3570A9949843.en.
Callithrix flaviceps
Corrêa HKM, Coutinho PE, Ferrari SF (2000) Between‐year differences in the feeding ecology of highland marmosets (Callithrix aurita and Callithrix flaviceps) in south‐eastern Brazil. J Zool 252: 421-427.
Ferrari SF (1988) The behaviour and ecology of the buffy-headed marmoset, Callithrix flaviceps (O. Thomas, 1903). Tese, University of London, UK.
Ferrari SF, Kátia H, Corrêa M, Coutinho, PE (1996) Ecology of the “southern” marmosets (Callithrix aurita and Callithrix flaviceps). In Norconk M, Rosenberger AL, Garber PA (eds) Adaptive radiations of neotropical primates. Springer US. pp. 157-171.
Guimarães A (1998) Ecologia, comportamento reprodutivo e marcação de cheiro em um grupo de Callithrix flaviceps (Callitrichidae, Primates), na Estação Biológica de Caratinga, Minas Gerais. Dissertação, Universidade Federal de Minas Gerais, Belo Horizonte.
Hilário RR (2009) Padrão de atividades, dieta e uso do hábitat por Callithrix flaviceps na Reserva Biológica Augusto Ruschi, Santa Teresa, ES. Dissertação, Universidade Federal de Minas Gerais, Belo Horizonte.
Rylands AB, Ferrari SF, Mendes SL (2008) Callithrix flaviceps. The IUCN Red List of Threatened Species 2008: e.T3571A9951402. http://dx.doi.org/10.2305/IUCN.UK.2008.RLTS.T3571A9951402.en.
Callithrix geoffroyi
Passamani M, Rylands AB (2000) Feeding behavior of Geoffroy's marmoset (Callithrix geoffroyi) in an Atlantic forest fragment of south-eastern Brazil. Primates 41: 27-38.
Passamani, M (1996) Ecologia e comportamento de um grupo de sagüi-da-cara-branca (Callithrix geoffroyi) em um fragmento de Mata Atlântica no Espírito Santo. Dissertação, Universidade Federal de Minas Gerais, Belo Horizonte.
Rylands AB, Mendes SL (2008) Callithrix geoffroyi The IUCN Red List of Threatened Species 2008: e.T3572A9952962. http://dx.doi.org/10.2305/IUCN.UK.2008.RLTS.T3572A9952962.en.
Callithrix jacchus
Alonso C, Langguth A (1989) Ecologia e comportamento de Callithrix jacchus (Primates: Callitrichidae) numa ilha de Floresta Atlântica. Rev Nordestina Biol 6: 105-137.
Pinheiro HLN, Pontes ARM (2015) Home range, diet, and activity patterns of common marmosets (Callithrix jacchus) in very small and isolated fragments of the Atlantic Forest of northeastern Brazil. Int J Ecol 2015: 685816.
Rylands AB, Mittermeier RA, Oliveira MM, Kierulff MCM (2008) Callithrix jacchus. The IUCN Red List of Threatened Species 2008: e.T41518A10485463. http://dx.doi.org/10.2305/IUCN.UK.2008.RLTS.T41518A10485463.en.
Silva JM, Albuquerque JR, Oliveira MAB (2011) Presença de artrópodes na dieta de um grupo de sagüis, Callithrix jacchus (Linnaeus, 1758) no Parque Estadual Dois Irmãos, Recife-PE, Brasil. In Mirana JMD, Hirano ZMB (eds) A primatologia no Brasil 12: 62-73.
Callithrix kuhlii
Raboy BE, Canale GR, Dietz JM (2008) Ecology of Callithrix kuhlii and a review of eastern Brazilian marmosets. Int J Primatol 29: 449-467.
Rylands AB, Kierullf MCM (2008) Callithrix kuhlii The IUCN Red List of Threatened Species 2008: e.T3575A9955873. http://dx.doi.org/10.2305/IUCN.UK.2008.RLTS.T3575A9955873.en.
Rylands AB (1989) Sympatric Brazilian callitrichids: the black tufted-ear marmoset, Callithrix kuhlii, and the golden-headed lion tamarin, Leontopithecus chrysomelas. J Human Evol 18: 679-695.
Callithrix penicillata
Rylands AB, Mendes SL (2008) Callithrix penicillata The IUCN Red List of Threatened Species 2008: e.T41519A10486326. http://dx.doi.org/10.2305/IUCN.UK.2008.RLTS.T41519A10486326.en.
Santos GR (2013) Comportamento e hábito alimentar de um grupo de Saguis-de-tufo-preto Callithrix penicillata (É. Geoffroy, 1812), em fragmento florestal urbano, Campo Grande, Mato Grosso do Sul. Dissertação, Universidade Federal de Mato Grosso do Sul, Campo Grande.
Leontopithecus caissara
Kierulff MCM, Raboy B, Oliveira PP, Miller M, Passos FC, Prado F (2002) Behavioral ecology of Leontopithecus. In Kleiman DG, Rylands AB (eds) The lion tamarins of Brazil. Smithsonian Institution Press, Washington, DC, USA. pp. 157-187.
Kierulff MCM, Rylands AB, Mendes SL, Oliveira MM (2008) Leontopithecus caissara. The IUCN Red List of Threatened Species 2008: e.T11503A3289886. http://dx.doi.org/10.2305/IUCN.UK.2008.RLTS.T11503A3289886.en.
Ludwig G (2011) Padrão de atividade, hábito alimentar, área de vida e uso do espaço do mico-leão-de-cara-preta (Leontopithecus Caissara Lorini e Persson 1990) (Primates, Callitrichidae) no Parque Nacional do Superagui, Guaraqueçaba, Estado do Paraná. Tese, Universidade Federal do Paraná, Curitiba.
Prado F, Valladares-Pádua C (2004) Ecologia alimentar de um grupo de mico-leão-da-cara-preta, Leontopithecus caissara (Primates, Callitrichidae), no Parque Nacional de Superagui, Guaraqueçaba-PR, Brasil. In Mendes SL, Chiarello AG (eds) A Primatologia no Brasil 8: 145-154.
Raboy BE, Dietz JM (2004) Diet, foraging, and use of space in wild golden‐headed lion tamarins. Am J Primatol 63: 1-15.
Leontopithecus chrysomelas
Catenacci LS, Pessoa MS, Nogueira-Filho SL, De Vleeschouwer KM (2016) Diet and feeding behavior of Leontopithecus chrysomelas (Callitrichidae) in degraded areas of the Atlantic Forest of south-Bahia, Brazil. Int J Primatol 37: 136-157.
Guidorizzi CE (2008) Ecologia e comportamento do mico-leão-da-cara dourada, Leontopithecus chrysomelas (Kuhl, 1820) (Primates, Callitrichidae), em um fragmento de floresta semidecidual em Itororó, Bahia, Brasil. Dissertação, Universidade Federal de Santa Cruz, Ilhéus, Bahia.
Kierulff MCM, Raboy B, Oliveira PP, Miller M, Passos FC, Prado, F (2002) Behavioral ecology of Leontopithecus. In Kleiman DG, Rylands AB (eds) The lion tamarins of Brazil. Smithsonian Institution Press, Washington, DC, USA. pp. 157-187.
Kierulff MCM, Rylands AB, Mendes SL, Oliveira MM (2008) Leontopithecus chrysomelas. The IUCN Red List of Threatened Species 2008: e.T40643A10347712. http://dx.doi.org/10.2305/IUCN.UK.2008.RLTS.T40643A10347712.en.
Raboy BE, Dietz JM (2004) Diet, foraging, and use of space in wild golden‐headed lion tamarins. Am J Primatol 63: 1-15.
Rylands AB (1989) Sympatric Brazilian callitrichids: the black tufted-ear marmoset, Callithrix kuhlii, and the golden-headed lion tamarin, Leontopithecus chrysomelas. J Human Evol 18: 679-695.
Leontopithecus chrysophygus
Kierulff MCM, Raboy B, Oliveira PP, Miller M, Passos FC, Prado, F (2002) Behavioral ecology of Leontopithecus. In Kleiman DG, Rylands AB (eds) The lion tamarins of Brazil. Smithsonian Institution Press, Washington, DC, USA. pp. 157-187.
Kierulff MCM, Rylands AB, Mendes SL, Oliveira MM (2008) Leontopithecus chrysopygus. The IUCN Red List of Threatened Species 2008: e.T11505A3290864. http://dx.doi.org/10.2305/IUCN.UK.2008.RLTS.T11505A3290864.en.
Oliveira LC, Neves LG, Raboy BE, Dietz JM (2011) Abundance of jackfruit (Artocarpus heterophyllus) affects group characteristics and use of space by golden-headed lion tamarins (Leontopithecus chrysomelas) in cabruca agroforest. J Environ Manage 48: 248-262.
Passos FDC (1999) Dieta de um grupo de mico-leão-preto, Leontopithecus chrysopygus (Mikan) (Mammalia, Callitrichidae), na Estação Ecológica dos Caetetus, São Paulo. Rev Bras Zool 16: 269-278.
Leontopithecus rosalia
Amorim APS (2007) Avaliação dos recursos alimentares dos micos-leões-dourados (Leontopithecus rosalia, Linneus, 1766) e sua relação com medidas corporais: uma aplicação da lógica fuzzy. Dissertação, Universidade Estadual do Norte Fluminense, Campos dos Goytacazes.
De Vleeschouwer KM, Raboy, BE (2013) Multilevel and transdisciplinary approaches to understanding endangered primates in complex landscapes: golden-headed lion tamarins in southern Bahia, Brazil. In Marsh LK, Chapman C (eds) Primates in fragments: Complexity and resilience. Springer New York. pp. 275-297.
Dietz JM, Peres CA, Pinder L (1997) Foraging ecology and use of space in wild golden lion tamarins (Leontopithecus rosalia). Am J Primatol 41: 289–305.
Kierulff MCM, Rylands AB, Oliveira MM (2008) Leontopithecus rosalia The IUCN Red List of Threatened Species 2008: e.T11506A3287321. http://dx.doi.org/10.2305/IUCN.UK.2008.RLTS.T11506A3287321.en.
Kleiman DG, Hoage RT, Green KM (1988) The lion tamarins, genus Leontopithecus In Mittermeier RA, Rylandas AB, Coimbra-Filho AF, Fonseca GAB (eds) Ecology and behavior of Neotropical primates. World Wildlife Fund, Washington. pp. 299-347.
Lapenta MJ, Oliveira PP, Kierulff MCM, Motta-Junior JC (2003) Fruit explotation by Golden Lion Tamarins (Leontopithecus rosalia) in the União Biological Reserve, Rio das Ostras, RJ – Brazil. Mammalia 67: 41-46.
Oliveira PP (2002) Ecologia alimentar, dieta e área de uso de micos-leões-dourados (Leontopithecus rosalia) translocados e sua relação com a distribuição espacial e temporal de recursos alimentares na Reserva Biológica União, RJ. Tese, Universidade Federal de Minas Gerais, Belo Horizonte, MG.
Rylands AB (1993) The ecology of the lion tamarins, Leontopithecus: some intrageneric differences and comparisons with other callitrichids. In Rylands AB (ed) Marmosets and tamarins: systematics, behaviour, and ecology. Oxford: Oxford University Press. pp. 296-313.
CEBIDAE
Sapajus apella
Brown AD, Zunino GE (1990) Dietary variability in Cebus apella in extreme habitats: evidence for adaptability. Folia Primatol 54: 187-195.
Gómez-Posada C (2012) Dieta y comportamiento alimentario de un grupo de mico maicero Cebus apella de acuerdo a la variación en la oferta de frutos y artrópodos, en la Amazonía colombiana. Acta Amaz 42: 363-372.
Izawa K (1979) Foods and feeding behavior of wild black-capped capuchin (Cebus apella) Primates 20: 57-76.
Rylands AB, Boubli JP, Mittermeier RA, Wallace RB, Ceballos-Mago N (2015) Sapajus apella. The IUCN Red List of Threatened Species 2015: e.T39949A70610943. http://dx.doi.org/10.2305/IUCN.UK.2015-1.RLTS.T39949A70610943.en.
Sapajus flavius
Malta ADJR, Pontes ARM (2013) The simplified novel diet of the highly threatened blond capuchin in the vanishing Pernambuco endemism center. In Marsh LK, Chapman C (eds) Primates in fragments: Complexity and resilience. Springer New York. pp. 245-257.
Oliveira MM, Boubli JP, Kierulff MCM (2015) Sapajus flavius The IUCN Red List of Threatened Species 2015: e.T136253A70612549. http://dx.doi.org/10.2305/IUCN.UK.2015.RLTS.T136253A70612549.en.
Valença-Montenegro MM (2011) Ecologia de Cebus flavius (Schreber, 1774) em remanescentes de Mata Atlântica no estado da Paraíba. Tese, Universidade de São Paulo, Piracicaba.
Sapajus libidinosus
Freitas CHD, Setz EZ, Araújo AR, Gobbi N (2008) Agricultural crops in the diet of bearded capuchin monkeys, Cebus libidinosus Spix (Primates: Cebidae), in forest fragments in southeast Brazil. Rev Bras Zool 25: 32-39.
Izar P, Verderane MP, Peternelli‐dos‐Santos L, Mendonça‐Furtado O, Presotto A, Tokuda M, Visalberghi E, Fragaszy D (2012) Flexible and conservative features of social systems in tufted capuchin monkeys: comparing the socioecology of Sapajus libidinosus and Sapajus nigritus. Am J Primatol 74: 315-331.
Rylands AB, Kierulff MCM (2015) Sapajus libidinosus. The IUCN Red List of Threatened Species 2015: e.T136346A70613080. http://dx.doi.org/10.2305/IUCN.UK.2015-1.RLTS.T136346A70613080.en.
Verderane MP (2010) Socioecologia de macacos-prego (Cebus libidinosus) em área de ecótono cerrado/caatinga. Tese, Universidade de São Paulo, São Paulo.
Sapajus nigritus
Carvalho D (2007) Predação em Pinus spp por Cebus nigritus (Goldfuss, 1809) (Primates; Cebidae) na região nordeste do Paraná-Brasil. Dissertação, Universidade Federal do Paraná, Curitiba.
Fogaça MD (2014) Comportamento alimentar e propriedades físicas dos alimentos consumidos por macacos-prego (Sapajus nigritus), no Parque Estadual Carlos Botelho, SP. Tese, Universidade de São Paulo, São Paulo.
Galetti M, Pedroni F (1994) Seasonal diet of capuchin monkeys (Cebus apella) in a semideciduous forest in south-east Brazil. J Trop Ecol 10: 27-39.
Izar P, Verderane MP, Peternelli‐dos‐Santos L, Mendonça‐Furtado O, Presotto A, Tokuda M, Visalberghi E, Fragaszy D (2012). Flexible and conservative features of social systems in tufted capuchin monkeys: comparing the socioecology of Sapajus libidinosus and Sapajus nigritus. Am J Primatol 74: 315-331.
Kierulff MCM, Mendes SL, Rylands AB (2015) Sapajus nigritus The IUCN Red List of Threatened Species 2015: e.T136717A70614145. http://dx.doi.org/10.2305/IUCN.UK.2015-1.RLTS.T136717A70614145.en.
Ludwig G, Aguiar LM, Rocha VJ (2005) Uma avaliação da dieta, da área de vida e das estimativas populacionais de Cebus nigritus (Goldfuss, 1809) em um fragmento florestal no norte do estado do Paraná. Neotrop Primates 13: 12-18.
Mikich SB, Liebsch D, Almeida A, Miyazaki RD (2015) O papel do macaco-prego Sapajus nigritus na dispersão de sementes e no controle potencial de insetos-praga em cultivos agrícolas e florestais. In Parron LM, Garcia JR, Oliveira EB, Brown GG, Prado RB (eds) Serviços ambientais em sistemas agrícolas e florestais do bioma Mata Atlântica. Embrapa Florestas, Colombo.
Silveira G, Reis NR (2008) Análise das três dimensões do nicho (alimento, espaço e tempo) de Cebus nigritus (Goldfuss, 1809) (Mammalia, Primates, Cebidae) em um fragmento florestal de Londrina, Paraná, Brasil. In Reis NR, Peracchi AL, Santos GAD (eds) Ecologia de mamíferos. Technical Books, Londrina. pp. 69-78.
Sapajus robustus
Fragaszy DM, Visalberghi E, Fedigan L (2004) The complete capuchin: The biology of the genus Cebus. Cambridge University Press, Cambridge, UK.
Freese CH, Oppenheimer JR (1981) The capuchin monkeys, Cebus In Coimbra-Filho AF, Mittermeier RA (eds) The ecology and behavior of Neotropical primates Academia Brasileira de Ciências, Rio de Janeiro, Brazil. pp. 331-390.
Kierulff MCM, Mendes SL, Rylands AB (2015) Sapajus robustus The IUCN Red List of Threatened Species 2015: e.T42697A70614762. http://dx.doi.org/10.2305/IUCN.UK.2015-1.RLTS.T42697A70614762.en.
Martins WP (2010) Densidade populacional e ecologia de um grupo macaco-prego-de-crista (Cebus robustus; Kuhl, 1820) na Reserva Natural Vale. Tese, Universidade Federal de Minas Gerais, Belo Horizonte.
Sapajus xanthosternus
Canale GR, Kierulff MCM, Chivers DJ (2013) A critically endangered capuchin monkey (Sapajus xanthosternos) living in a highly fragmented hotspot. In Marsh LK, Chapman C (eds) Primates in fragments: Complexity and resilience. Springer New York. pp. 299-311.
Fragaszy DM, Visalberghi E, Fedigan L (2004) The complete capuchin: The biology of the genus Cebus. Cambridge University Press, Cambridge, UK.
Freese CH, Oppenheimer JR (1981) The capuchin monkeys, Cebus In Coimbra-Filho AF, Mittermeier RA (eds) The ecology and behavior of Neotropical primates Academia Brasileira de Ciências, Rio de Janeiro, Brazil. pp. 331-390.
Kierulff MCM, Mendes SL, Rylands AB (2015) Sapajus xanthosternos The IUCN Red List of Threatened Species 2015: e.T4074A70615251. http://dx.doi.org/10.2305/IUCN.UK.2015-1.RLTS.T4074A70615251.en.
PITHECIIDAE
Callicebus coimbrai
Jerusalinsky L, Oliveira MM, Pereira RF, Santana V, Bastos PCR, Ferrari SF (2006) Preliminary evaluation of the conservation status of Callicebus coimbrai Kobayashi & Langguth, 1999 in the Brazilian state of Sergipe. Primate Conserv 21: 25-32.
Santana MM (2012) Comportamento, dieta e uso do espaço em um grupo de guigó-de-coimbra (Callicebus coimbrai Kobayashi & Langguth 1999) no RVS Mata do Junco Capela - SE. Dissertação, Universidade Federal de Sergipe, São Cristóvão.
Souza‐Alves JP, Fontes IP, Chagas RR, Ferrari SF (2011) Seasonal versatility in the feeding ecology of a group of titis (Callicebus coimbrai) in the northern Brazilian Atlantic Forest. Am J Primatol 73: 1199-1209.
Van Roosmalen MG, Van Roosmalen T, Mittermeier RA (2002) A taxonomic review of the titi monkeys, genus Callicebus Thomas, 1903, with the description of two new species, Callicebus bernhardi and Callicebus stephennashi, from Brazilian Amazonia. Neotrop Primates 10: 1-52.
Veiga LM, Sousa MC, Jerusalinsky L, Ferrari SF, Oliveira MM, Santos SSD, Valente MCM, Printes RC (2008) Callicebus coimbrai. The IUCN Red List of Threatened Species 2008: e.T39954A10297332. http://dx.doi.org/10.2305/IUCN.UK.2008.RLTS.T39954A10297332.en.
Callicebus melanochir
Cardoso NA, Santos BS (2005) Use of food resources by Callicebus melanochir (Primates: Pitheciidae) in an Atlantic forest fragment in the Serra do Teimoso Natural Reserve, Jussari - BA. Programa e Livro de Resumos XI Congresso Brasileiro de Primatologia.
Heiduck S (1997) Food choice in masked titi monkeys (Callicebus personatus melanochir): selectivity or opportunism? Int J Primatol 18: 487-502.
Müller KH, Pissinatti A (1995) Ecology and feeding behavior of masked titi monkeys. Neotrop Primates 3: 51-52.
Müller KH (1996) Diet and feeding ecology of masked titis (Callicebus personatus). In Norconk M, Rosenberger AL, Garber PA (eds) Adaptive radiations of neotropical primates. Springer US. pp. 383-401.
Veiga LM, Printes RC, Ferrari SF, Kierulff CM, Oliveira MM, Mendes SL (2008) Callicebus melanochir. The IUCN Red List of Threatened Species 2008: e.T39930A10292634. http://dx.doi.org/10.2305/IUCN.UK.2008.RLTS.T39930A10292634.en.
Callicebus nigrifrons
Caselli CB, Setz EZF (2011) Feeding ecology and activity pattern of black-fronted titi monkeys (Callicebus nigrifrons) in a semideciduous tropical forest of southern Brazil. Primates 52: 351.
Franco ES (2006) Comportamento alimentar e dieta de Callicebus nigrifrons Spix, 1823 (PRIMATES: Phiteciidae) na natureza. Monografia, Centro Universitário Metodista Izabela Hendrix.
Nagy-Reis MB, Setz EZ (2017) Foraging strategies of black-fronted titi monkeys (Callicebus nigrifrons) in relation to food availability in a seasonal tropical forest. Primates 58: 149.
Santos GP, Galvão C, Young RJ (2012) The diet of wild black-fronted titi monkeys Callicebus nigrifrons during a bamboo masting year. Primates 53: 265-272.
Souza SB, Martins MM, Setz EZF (1996) Activity pattern and feeding ecology of sympatric masked titi monkeys and buffy tufted-ear marmosets. XVIth Congress of the International Primatological, XIXth Conference of the American Society of Primatologists.
Trevelin LC, Port-Carvalho M, Silveira M, Morell E (2007) Abundance, habitat use and diet of Callicebus nigrifrons Spix (Primates, Pitheciidae) in Cantareira State Park, São Paulo, Brazil. Rev Bras Zool 24: 1071-1077.
Veiga LM, Kierulff CM, Oliveira MM, Mendes SL (2008). Callicebus nigrifrons. The IUCN Red List of Threatened Species 2008: e.T39943A10294282. http://dx.doi.org/10.2305/IUCN.UK.2008.RLTS.T39943A10294282.en.
Callicebus personatus
Fernandes CC (2013) Padrão de atividade, dieta e uso do espaço por Callicebus personatus (Primates, Pitheciidae) em uma Área de Parque Urbano, Município de Santa Teresa, ES. Dissertação, Universidade Federal do Espírito Santo, Vitória.
Kinzey WG, Becker M (1983) Activity pattern of the masked titi monkey, Callicebus personatus. Primates 24: 337-343.
Müller KH, Ahl C, Hartmann G (1997) Geophagy in masked titi monkeys (Callicebus personatus melanochir) in Brazil. Primates 38: 69-77.
Neri FM (1997) Manejo de Callicebus personatus (Geoffroy, 1812) resgatados: uma tentativa de Translocação e estudos ecológicos de um grupo silvestre na Reserva Particular de Patrimônio Natural Galheiros - Minas Gerais. Dissertação, Universidade Federal de Minas Gerais, Belo Horizonte.
Price EC, Piedade HELM (2002) Diet of northern masked titi monkeys (Callicebus personatus). Folia Primatol 72: 335-338.
Setz EZF, Souza-Alves JP, Caselli CB, Nagy-Reis MB, Souza SB (2014) Feeding ecology and diet of titis of the Callicebus personatus group. In XXVth Congress of International Primatological Society, At Hanoi, Vietnam.
Souza SB, Setz EZF (1995) O bambu na dieta de sauás - Callicebus personatus - em um fragmento de mata do sul de Minas Gerais. In: Resumos do VII Congresso Brasileiro de Primatologia, Natal.
CARNIVORA
CANIDAE
Cerdocyon thous
Amaral C (2007) Dieta de duas espécies carnívoras simpátricas - Graxaim-do-mato Cerdocyon thous (Linnaeus, 1766) e Quati Nasua nasua (Linnaeus, 1766) nos municípios de Tijucas do Sul, estado do Paraná. Dissertação, Universidade Federal do Paraná, Curitiba.
Bandini MA (2009) Estudo sobre a dieta e parasitos gastrointestinais de Cerdocyon thous (Linnaeus, 1766) (Carnivora, Canidae). Monografia, Universidade Regional de Blumenau, Santa Catarina.
Beisiegel BDM (1999) Contribuição ao estudo da história natural do cachorro do mato, Cerdocyon thous e do cachorro vinagre, Spethous venaticus. Tese, Universidade de São Paulo, São Paulo.
Beisiegel BM, Lemos FG, Azevedo FC, Queirolo D, Pinto RS (2013) Avaliação do risco de extinção do cachorro-do-mato Cerdocyon thous (Linnaeus, 1766) no Brasil. Biodivers Bras 1: 138-145.
Facure KG (1996) Ecologia alimentar do cachorro-do-mato Cerdocyon thous (Carnivora-Canidae), no Parque Florestal do Itapetinga, município de Atibaia, sudeste do Brasil. Dissertação, Universidade Estadual de Campinas, Campinas.
Facure KG, Giaretta AA, Monteiro-Filho ELA (2003) Food habits of the crab-eating-fox, Cerdocyon thous, in an altitudinal forest of the Mantiqueira Range, southeastern Brazil. Mammalia 67: 503-512.
Facure KG, Giaretta AA (1996) Food habits of carnivores in a coastal Atlantic Forest of southeastern Brazil. Mammalia 60: 499-502.
Gatti A, Bianchi R, Rosa CRX, Mendes SL (2006) Diet of two sympatric mesocarnivores, Cerdocyon thous and Procyon cancrivorus, in a restinga area of Espirito Santo State, Brazil. J Trop Ecol 22: 227-230.
Juarez KM, Marinho-Filho J (2002) Diet, habitat use, and home ranges of sympatric canids in central Brazil. J Mammal 83: 925-933.
Lucherini M (2015) Cerdocyon thous The IUCN Red List of Threatened Species 2015: e.T4248A81266293. http://dx.doi.org/10.2305/IUCN.UK.2015-4.RLTS.T4248A81266293.en.
Motta-Junior JC, Lombardi JA, Talamoni SA (1994) Notes on Crab-eating fox (Dusicyan thous). seed dispersal and food habits in southeastern Brazil. Mammalia 58: 156-159.
Nunes LS, Porto LMV, Jardim MMA (2012) Dieta de Cerdocyon thous (Carnivora, Canidae) em um fragmento de mata de restinga no sul do Rio Grande do Sul, Brasil. In: 21º Congresso de Iniciação Científica, Universidade Federal de Pelotas.
Pedó E, Tomazzoni AC, Hartz SM, Christoff AU (2006) Diet of crab-eating fox, Cerdocyon thous (Linnaeus) (Carnivora, Canidae), in a suburban area of southern Brazil. Rev Bras Zool 23: 637-641.
Raíces DSL, Bergallo HG (2010) Diet and seed dispersion of the crab-eaten fox, Cerdocyon thous (Linnaeus, 1766) in Restinga de Jurubatiba National Park, Rio de Janeiro State, Brazil. Neotrop Biol Conserv 5: 24-30.
Rocha VJ, Aguiar LM, Silva-Pereira JE, Moro-Rios RF, Passos FC (2008) Feeding habits of the crab-eating fox, Cerdocyon thous (Carnivora: Canidae), in a mosaic area with native and exotic vegetation in Southern Brazil. Rev Bras Zool 25: 594-600.
Rocha VJ, Reis NRD, Sekiama ML (2004) Dieta e dispersão de sementes por Cerdocyon thous (Linnaeus) (Carnivora, Canidae), em um fragmento florestal no Paraná, Brasil. Rev Bras Zool 21: 871-876.
Rocha-Mendes F, Mikich SB, Quadros J, Pedro WA (2010) Feeding ecology of carnivores (Mammalia, Carnivora) in Atlantic forest remnants, southern Brazil. Biota Neotrop 10: 21-30.
Veiga JB, Foguesato K, Silva VM (2010) Dieta do graxaim do mato (Cerdocyon thous) no Centro de Estudos, Pesquisa e Preservação Ambiental (CEPPA) - UNICRUZ. In Seminário Interinstitucional de Ensino Pesquisa e Extensão, UNICRUZ.
Vieira EM, Port D (2006) Niche overlap and resource partitioning between two sympatric fox species in southern Brazil. J Zool 272: 57-63.
Chrysocyon brachyurus
Amboni MPM (2007) Dieta, disponibilidade alimentar e padrão de movimentação do lobo-guará, Chrysocyon brachyurus, no Parque Nacional da Serra da Canastra, MG. Dissertação, Universidade Federal de Minas Gerais, Belo Horizonte.
Aragona M, Setz E (2001) Diet of the maned wolf, Chrysocyon brachyurus (Mammalia: Canidae), during wet and dry seasons at Ibitipoca State Park, Brazil. J Zool 254: 131-136.
Bueno ADA, Motta Junior JC (2009) Feeding habits of the maned wolf, Chrysocyon brachyurus (Carnivora: Canidae), in southeast Brazil. Stud Neotrop Fauna E 44: 67-75.
Bueno ADA, Belentani SCDS, Motta-Junior JC (2002) Feeding ecology of the maned wolf, Chrysocyon brachyurus (Illiger, 1815) (Mammalia: Canidae), in the ecological station of Itirapina, São Paulo State, Brazil. Biota Neotrop 2: 1-9.
Cheida CC (2005) Dieta e dispersão de sementes pelo lobo-guará Chrysocyon brachyurus (Illiger 1815) em uma área com campo natural, Floresta Ombrófila Mista e silvicultura, Paraná, Brasil. Dissertação, Universidade Federal do Paraná, Curitiba.
Dietz JM (1984) Ecology and social organization of the maned wolf: Chrysocyon brachyurus. Smithson Contr Zool 59.
Jácomo ATDA (1999) Nicho alimentar do lobo guará (Chrysocyon brachyurus Illiger, 1811) no Parque Nacional das Emas-GO. Dissertação, Universidade Federal de Goiás.
Juarez KM, Marinho-Filho J (2002) Diet, habitat use, and home ranges of sympatric canids in central Brazil. J Mammal 83: 925-933.
Massara RL, Paschoal AMO, Hirsch A, Chiarello AG (2012) Diet and habitat use by maned wolf outside protected areas in eastern Brazil. Trop Conserv Sci 5: 284-300.
Michalski LJ, Barbola IF, Luz PM (2014) Ecologia trófica do lobo-guará, Chrysocyon Brachyurus (Illiger, 1811), no Parque Estadual do Guartelá, Tibagi, PR, Brasil. Rev Bras Zooc 15: 107-122.
Motta-Junior JC, Martins K (2001) 19 The Frugivorous Diet of the Maned Wolf, Chrysocyon brachyurus, in Brazil: Ecology and Conservation. In Roberts L, Hall D (eds) Rural tourism and recreation: Principles to practice. CABI. p. 291.
Motta‐Junior JC, Talamoni SA, Lombardi JA, Simokomaki K (1996) Diet of the maned wolf, Chrysocyon brachyurus, in central Brazil. J Zool 240: 277-284.
Queirolo D, Motta-Junior JC (2007) Prey availability and diet of maned wolf in Serra da Canastra National Park, southeastern Brazil. Acta Theriol 52: 391-402.
Rodrigues FH, Hass A, Lacerda AC, Grando RLSC, Bagno MA, Bezerra AM, Silva WR (2007) Feeding habits of the maned wolf (Chrysocyon brachyurus) in the Brazilian Cerrado. Mastozool Neotrop 14: 37-51.
Santos EF, Setz EZ, Gobbi N (2003) Diet of the maned wolf (Chrysocyon brachyurus) and its role in seed dispersal on a cattle ranch in Brazil. J Zool 260: 203-208.
Silva JA, Talamoni SA (2003) Diet adjustments of maned wolves, Chrysocyon brachyurus (Illiger) (Mammalia, Canidae), subjected to supplemental feeding in a private natural reserve, Southeastern Brazil. Rev Bras Zool 20: 339-345.
Lycalopex gymnocercus
Castillo DF, Birochio DE, Lucherini M, Casanave EB (2011) Diet of adults and cubs of Lycalopex gymnocercus in Pampas grassland: a validation of the Optimal Foraging Theory? Ann Zool Fennici 48: 251-256.
Farias AA, Kittlein MJ (2008) Small-scale spatial variability in the diet of pampas foxes (Pseudalopex gymnocercus) and human-induced changes in prey base. Ecol Res 23: 543-550.
García VB, Kittlein MJ (2005) Diet, habitat use, and relative abundance of pampas fox (Pseudalopex gymnocercus) in northern Patagonia, Argentina. Mamm Biol 70: 218-226.
Lucherini M, Vidal EML (2008) Lycalopex gymnocercus (carnivora: canidae) Mamm Species 820: 1-9.
Queirolo D, Kasper CB, Beisiegel BM (2013) Avaliação do risco de extinção do graxaim-do-campo Lycalopex gymnocercus (G. Fischer, 1814) no Brasil. Biodivers Bras 1: 172-178.
Varela O, Cormenzana-Méndez A, Krapovickas L, Bucher EH (2008) Seasonal diet of the pampas fox (Lycalopex gymnocercus) in the Chaco dry woodland, northwestern Argentina. J Mamm 89: 1012-1019.
Vieira EM, Port D (2006) Niche overlap and resource partitioning between two sympatric fox species in southern Brazil. J Zool 272: 57-63.
Lycalopex vetulus
Courtenay O, Macdonald DW, Gillingham S, Almeida G, Dias R (2006) First observations on South America's largely insectivorous canid: the hoary fox (Pseudalopex vetulus). J Zool 268: 45-54.
Dalponte JC, Lima EDS (1999) Disponibilidade de frutos e a dieta de Lycalopex vetulus (Carnivora-Canidae) em um cerrado de Mato Grosso, Brasil. Rev Bras Bot 22: 325-332.
Dalponte JC (1997) Diet of the hoary fox, Lycalopex vetulus, in Mato Grosso, Central Brazil. Mammalia 61: 537-546.
Dalponte JC (2003) História natural, comportamento e conservação da raposa-do-campo, Pseudalopex vetulus (Canidae). Tese, Universidade de Brasília, Brasília.
Dalponte JC (2009) Lycalopex vetulus (Carnivora: Canidae) Mamm Species 847: 1-7.
Ferreira-Silva E, Lima EDS (2006) Termite predation by the hoary fox, Pseudalopex vetulus (Lund) (Carnivora, Canidae), in a pasture in Mato Grosso, Central Brazil. Mammalia 70: 255-260.
Jácomo ATA, Silveira L, Diniz-Filho JAF (2004) Niche separation between the maned wolf (Chrysocyon brachyurus), the crab-eating fox (Dusicyon thous) and the hoary fox (Dusicyon vetulus) in central Brazil. J Zool 262: 99-106.
Juarez KM, Marinho-Filho J (2002) Diet, habitat use, and home ranges of sympatric canids in central Brazil. J Mamm 83: 925-933.
Lemos FG, Azevedo FC, Beisiegel BM, Jorge RPS, Paula RC, Rodrigues FHG, Rodrigues LA (2013) Avaliação do risco de extinção da Raposa-do-campo Lycalopex vetulus (Lund, 1842) no Brasil. Biodivers Bras 1: 160-171.
Rocha EC (2006) Aspectos da história natural e conservação de Pseudalopex vetulus (Lund, 1842) (Carnivora: Canidae). Dissertação, Universidade Federal de Viçosas, Viçosas.
Silva EF (2001) Dieta de Pseudalopex vetulus (Lund, 1842) (Carnivora, Canidae) em relação às espécies de cupins disponíveis em uma área de pastagem. Monografia, Universidade do Estado de Mato Grosso, Nova Xavantina.
Speothos venaticus
Jorge RPS, Beisiegel BM, Lima ES, Jorge MLDSP, Leite-Pitman MRP, Paula RC (2013) Avaliação do risco de extinção do cachorro-vinagre Speothos venaticus (Lund, 1842) no Brasil. Biodivers Bras 1: 179-190.
Tate GHH (1931) Random observations on habits of South American mammals J Mamm 12: 248-256.
Lima ES, Jorge P, Silva R, Dalponte JC (2009) Habitat use and diet of bush dogs, Speothos venaticus, in the Northern Pantanal, Mato Grosso, Brazil. Mammalia 73: 13-19.
DeMatteo KE (2008) Using a survey of carnivore conservationists to gain new insight into the ecology and conservation status of the bush dog. Canid News 11: 1-8.
Deutsch LA (1983) An encounter between bush dog (Speothos venaticus) and paca (Agouti paca). J Mamm 64: 532-533.
Beisiegel BDM, Zuercher GL (2005) Speothos venaticus Mamm Species 783: 1-6.
Lima ES, DeMatteo KE, Jorge RS, Jorge MLS, Dalponte JC, Lima HS, Klorfine SA (2012) First telemetry study of bush dogs: home range, activity and habitat selection. Wildl Res 39: 512-519.
Lima ES, Jorge MLS, Jorge RS, Morato RG (2015) The bush dog Speothos venaticus: area requirement and habitat use in cultivated lands. Oryx 49: 64-70.
Strahl SD, Silva JL, Goldstein IR (1992) The bush dog (Speothos venaticus) in Venezuela. Mammalia 56: 9-14.
Beisiegel BDM, Ades C (2002) The behavior of the bush dog (Speothos venaticus Lund, 1842) in the field: a review. Rev Etol 4: 17-23.
Peres CA (1991) Observations on hunting by small-eared (Atelocynus microtis) and bush dogs (Speothos venaticus) in central-western Amazonia. Mammalia 55: 635-639.
Zuercher GL, Gipson PS, Carrillo O (2005) Diet and habitat associations of bush dogs Speothos venaticus in the Interior Atlantic Forest of eastern Paraguay. Oryx 39: 86-89.
FELIDAE
Leopardus pardalis
Abreu KC, Moro-Rios RF, Silva-Pereira JE, Miranda JM, Jablonski EF, Passos FC (2008) Feeding habits of ocelot (Leopardus pardalis) in Southern Brazil. Mamm Biol 73: 407-411.
Facure-Giaretta KG (2002) Ecologia alimentar de duas espécies de felinos do gênero Leopardus em uma floresta secundária no sudeste do Brasil. Tese, Universidade Estadual de Campinas, Campinas.
Golec C (2012) Dieta de cinco espécies simpátricas de felídeos: Puma concolor (Linnaeus 1771), Puma yagouaroundi (E. Geoffroy, 1803), Leopardus pardalis (Linnaeus 1758), Leopardus wiedii (Schinz, 1821) e Leopardus tigrinus (Schreber, 1775) (Carnivora, Felidae), no Corredor Federal do Iguaçu, região Centro-oeste do Paraná. Dissertação, Universidade Estadual do Paraná, Paranavaí.
Martins R, Quadros J, Mazzolli M (2008) Food habits and anthropic interference on the territorial marking activity of Puma concolor and Leopardus pardalis (Carnivora: Felidae) and other carnivores in the Jureia-Itatins Ecological Station, Sao Paulo, Brazil. Rev Bras Zool 25: 427-435.
Oliveira TG, Almeida LB, Campos CB (2013) Avaliação do risco de extinção da jaguatirica Leopardus pardalis (Linnaeus, 1758) no Brasil. Biodivers Bras 1: 66-75.
Paviolo A, Crawshaw P, Caso A, Oliveira T, Lopez-Gonzalez CA, Kelly M, De Angelo C, Payan E (2015) Leopardus pardalis (errata version published in 2016) The IUCN Red List of Threatened Species 2015: e.T11509A97212355.
Pereira JES (2009) Dieta de três espécies simpátricas de felídeos - Leopardus pardalis, Leopardus tigrinus e Puma yagouaroundi (Carnivora, felidae) - em floresta ombrófila mista e campos gerais, Paraná, sul do Brasil. Dissertação, Universidade Federal do Paraná, Curitiba.
Rocha-Mendes F, Mikich SB, Quadros J, Pedro WA (2010) Feeding ecology of carnivores (Mammalia, Carnivora) in Atlantic forest remnants, southern Brazil. Biota Neotrop 10: 21-30.
Silva-Pereira JE, Moro-Rios RF, Bilski DR, Passos FC (2011) Diets of three sympatric Neotropical small cats: Food niche overlap and interspecies differences in prey consumption. Mamm Biol 76: 308-312.
Vidolin GP (2004) Aspectos bio-ecológicos de Puma concolor (Linnaeus, 1771), Leopardus pardalis (Linnaeus, 1758) e Leopardus tigrinus (Schreber, 1775) na Reserva Natural Salto Morato, Guaraqueçaba, Paraná, Brasil. Dissertação, Universidade Federal do Paraná, Curitiba.
Wang E (2002) Diets of ocelots (Leopardus pardalis), margays (L wiedii), and oncillas (L tigrinus) in the Atlantic rainforest in southeast Brazil. Stud Neotrop Fauna E 37: 207-212.
Leopardus guttulus
Facure KG, Giaretta AA (1996) Food habits of carnivores in a coastal Atlantic Forest of southeastern Brazil. Mammalia 60: 499-502.
Facure-Giaretta KG (2002) Ecologia alimentar de duas espécies de felinos do gênero Leopardus em uma floresta secundária no sudeste do Brasil. Tese, Universidade Estadual de Campinas, Campinas.
Golec C (2012) Dieta de cinco espécies simpátricas de felídeos: Puma concolor (Linnaeus 1771), Puma yagouaroundi (E. Geoffroy, 1803), Leopardus pardalis (Linnaeus 1758), Leopardus wiedii (Schinz, 1821) e Leopardus tigrinus (Schreber, 1775) (Carnivora, Felidae), no Corredor Federal do Iguaçu, região Centro-oeste do Paraná. Dissertação, Universidade Estadual do Paraná, Paranavaí.
Oliveira T, Trigo T, Tortato M, Paviolo A, Bianchi R, Leite-Pitman MRP (2016) Leopardus guttulus. The IUCN Red List of Threatened Species 2016: e.T54010476A54010576. http://dx.doi.org/10.2305/IUCN.UK.2016-2.RLTS.T54010476A54010576.en.
Oliveira TG, Tortato MA, Almeida LB, Campos CB, Beisiegel BM (2013) Avaliação do risco de extinção do gato-do-mato Leopardus tigrinus no Brasil. Biodivers Bras 1: 56-65.
Pereira JES (2009) Dieta de três espécies simpátricas de felídeos - Leopardus pardalis, Leopardus tigrinus e Puma yagouaroundi (Carnivora, felidae) - em floresta ombrófila mista e campos gerais, Paraná, sul do Brasil. Dissertação, Universidade Federal do Paraná, Curitiba.
Rinaldi AR (2010) Dieta de pequenos felinos silvestres (Carnivora, Felidae), em área antropizada de Mata Atlântica de Interior, Alto Rio Paraná, Paraná, Brasil. Dissertação, Universidade Federal do Paraná, Curitiba.
Rocha-Mendes F (2005) Ecologia alimentar de carnívoros (Mammalia: Carnívora) e elementos de Etnozoologia do município de Fênix, Paraná, Brasil. Dissertação, Universidade Estadual Paulista "Júlio de Mesquita", São José do Rio Preto.
Rocha-Mendes F, Mikich SB, Quadros J, Pedro WA (2010) Feeding ecology of carnivores (Mammalia, Carnivora) in Atlantic forest remnants, southern Brazil. Biota Neotrop 10: 21-30.
Seibert JB, Moreira DO, Mendes SL, Gatti A (2015) Diet of two sympatric felids (Leopardus tigrinus and Leopardus wiedii) in a remnant of Atlantic forest, in the montane region of Espírito Santo, southeastern Brazil. Bol Mus Biol Mello Leitão 37: 193-200.
Silva-Pereira JE, Moro-Rios RF, Bilski DR, Passos FC (2011) Diets of three sympatric Neotropical small cats: Food niche overlap and interspecies differences in prey consumption. Mamm Biol 76: 308-312.
Tortato MA (2009) Disponibilidade e uso de presas na dieta do gato-do-mato-pequeno, Leopardus tigrinus (Schreber, 1775) em área de restinga no sul do Brasil. Dissertação, Universidade Federal do Paraná, Curitiba.
Trigo TC, Tirelli FP, Machado LF, Peters FB, Indrusiak CB, Mazim FD, Sana D, Eizirik E, Freitas TRO (2013) Geographic distribution and food habits of Leopardus tigrinus and L. geoffroyi (Carnivora, Felidae) at their geographic contact zone in southern Brazil. Stud Neotrop Fauna E 48: 56-67.
Wang E (2002) Diets of ocelots (Leopardus pardalis), margays (L. wiedii), and oncillas (L. tigrinus) in the Atlantic rainforest in southeast Brazil. Stud Neotrop Fauna E 37: 207-212.
Leopardus wiedii
Bianchi RDC, Rosa AF, Gatti A, Mendes SL (2011) Diet of margay, Leopardus wiedii, and jaguarundi, Puma yagouaroundi, (Carnivora: Felidae) in Atlantic rainforest, Brazil. Zoologia 28: 127-132.
Golec C (2012) Dieta de cinco espécies simpátricas de felídeos: Puma concolor (Linnaeus 1771), Puma yagouaroundi (E. Geoffroy, 1803), Leopardus pardalis (Linnaeus 1758), Leopardus wiedii (Schinz, 1821) e Leopardus tigrinus (Schreber, 1775) (Carnivora, Felidae), no Corredor Federal do Iguaçu, região Centro-oeste do Paraná. Dissertação, Universidade Estadual do Paraná, Paranavaí.
Meiorin RP, Kasper CB (2016) Comparação da dieta de quatro felinos simpátricos no Pampa gaúcho. Anais SIEPE 7.
Oliveira TG (1998) Leopardus wiedii. Mamm Species 579: 1-6.
Oliveira T, Paviolo A, Schipper J, Bianchi R, Payan E, Carvajal SV (2015) Leopardus wiedii. The IUCN Red List of Threatened Species 2015: e.T11511A50654216. http://dx.doi.org/10.2305/IUCN.UK.2015-4.RLTS.T11511A50654216.en.
Rinaldi AR (2010) Dieta de pequenos felinos silvestres (Carnivora, Felidae), em área antropizada de Mata Atlântica de Interior, Alto Rio Paraná, Paraná, Brasil. Dissertação, Universidade Federal do Paraná, Curitiba.
Rocha-Mendes F (2005) Ecologia alimentar de carnívoros (Mammalia: Carnívora) e elementos de Etnozoologia do município de Fênix, Paraná, Brasil. Dissertação, Universidade Estadual Paulista "Júlio de Mesquita", São José do Rio Preto.
Rocha-Mendes F, Mikich SB, Quadros J, Pedro WA (2010) Feeding ecology of carnivores (Mammalia, Carnivora) in Atlantic forest remnants, southern Brazil. Biota Neotrop 10: 21-30.
Seibert JB, Moreira DO, Mendes SL, Gatti A (2015) Diet of two sympatric felids (Leopardus tigrinus and Leopardus wiedii) in a remnant of Atlantic forest, in the montane region of Espírito Santo, southeastern Brazil. Bol Mus Biol Mello Leitão 37: 193-200.
Tortato MA, Oliveira TG, Almeida LB, Beisiegel BM (2013) Avaliação do risco de extinção do gato-maracajá Leopardus wiedii (Schinz, 1821) no Brasil. Biodivers Bras 1: 76-83.
Wang E (2002) Diets of ocelots (Leopardus pardalis), margays (L. wiedii), and oncillas (L. tigrinus) in the Atlantic rainforest in southeast Brazil. Stud Neotrop Fauna E 37: 207-212.
Panthera onca
Azevedo FCC (2008) Food habits and livestock depredation of sympatric jaguars and pumas in the Iguacu National Park area, south Brazil. Biotropica 40: 494-500.
Caso A, Lopez-Gonzalez C, Payan E, Eizirik E, Oliveira T, Leite-Pitman R, Kelly M, Valderrama C. (2008). Panthera onca. The IUCN Red List of Threatened Species 2008: e.T15953A5327466. http://dx.doi.org/10.2305/IUCN.UK.2008.RLTS.T15953A5327466.en.
Cavalcanti SM, Gese EM (2010) Kill rates and predation patterns of jaguars (Panthera onca) in the southern Pantanal, Brazil. J Mamm 91: 722-736.
Crawshaw Jr. PG, Quigley HB (2002) Hábitos alimentarios del jaguar y el puma en el Pantanal, Brasil, con implicaciones para su manejo y conservación In Medellín RA, Equihua C, Chetkiewicz CLB, Crawshaw Jr. PG, Rabinowitz A, Redford KH, Robinson JG, Sanderson EW, Taber AB (eds) El jaguar en el nuevo milênio Universidad Nacional Autónoma de México, Wildlife Conservation Society y Fondo de Cultura E…
Garla RC, Setz EZ, Gobbi N (2001) Jaguar (Panthera onca) food habits in Atlantic Rain Forest of southeastern Brazil. Biotropica 33: 691-696.
Leite MRP (2000) Relações entre a onça-pintada, onça-parda e moradores locais em três unidades de conservação da Floresta Atlântica do Estado do Paraná, Brasil. Dissertação, Universidade Federal do Paraná, Curitiba.
Morato RG, Beisiegel BM, Ramalho EE, Campos CB, Boulhosa RLP (2013) Avaliação do risco de extinção da onça-pintada Panthera onca (Linnaeus, 1758) no Brasil. Biodivers Bras 1: 122-132.
Sollmann, R, Betsch, J, Furtado, MM, Hofer, H, Jácomo, AT, Palomares, F, Roques, S, Tôrres, NM, Vynne, C & Silveira, L (2013) Note on the diet of the jaguar in central Brazil. European Journal of Wildlife Research 59:445-448.
Puma concolor
Azevedo FCC (2008) Food habits and livestock depredation of sympatric jaguars and pumas in the Iguacu National Park area, south Brazil. Biotropica 40: 494-500.
Azevedo FC, Lemos FG, Almeida LB, Campos CB, Beisiegel BM, Paula RC, Crawshaw Jr. PG, Ferraz KMPMB, Oliveira TG (2013) Avaliação do risco de extinção da onça-parda Puma concolor (Linnaeus, 1771) no Brasil. Biodivers Bras 1: 107-121.
Bilski DR (2007) Dieta de Puma concolor (Linnaeus, 1771) na região dos Campos Gerais, Paraná, Brasil. Monografia, Universidade Federal do Paraná, Curitiba.
Brito BFA (2000) Ecologia alimentar da onça parda Puma concolor na Mata Atlântica de Linhares, Espírito Santo, Brasil. Dissertação, Universidade de Brasília, Brasília.
Golec C (2012) Dieta de cinco espécies simpátricas de felídeos: Puma concolor (Linnaeus 1771), Puma yagouaroundi (E. Geoffroy, 1803), Leopardus pardalis (Linnaeus 1758), Leopardus wiedii (Schinz, 1821) e Leopardus tigrinus (Schreber, 1775) (Carnivora, Felidae), no Corredor Federal do Iguaçu, região Centro-oeste do Paraná. Dissertação, Universidade Estadual do Paraná, Paranavaí.
Magezi GS (2013) Dieta de felídeos silvestres em áreas de Floresta Atlântica Costeira, litoral Norte do Estado do Paraná. Dissertação, Universidade Federal do Paraná, Curitiba.
Martins R, Quadros J, Mazzolli M (2008) Food habits and anthropic interference on the territorial marking activity of Puma concolor and Leopardus pardalis (Carnivora: Felidae) and other carnivores in the Jureia-Itatins Ecological Station, Sao Paulo, Brazil. Rev Bras Zool 25: 427-435.
Röhe F (2002) Hábitos alimentares de suçuarana (Puma concolor) (Linnaeus 1771) em Mosaico de Floresta Secundária e reflorestamento de Eucaliptus saligna. Mata Atlântica, no Município de Pilar do Sul–SP. Dissertação, Universidade Estadual de Campinas, Campinas.
Vidolin GP (2004) Aspectos bio-ecológicos de Puma concolor (Linnaeus, 1771), Leopardus pardalis (Linnaeus, 1758) e Leopardus tigrinus (Schreber, 1775) na Reserva Natural Salto Morato, Guaraqueçaba, Paraná, Brasil. Dissertação, Universidade Federal do Paraná, Curitiba.
Puma yagouaroundi
Almeida LB, Queirolo D, Beisiegel BM, Oliveira TG (2013) Avaliação do estado de conservação do gato-mourisco Puma yagouaroundi (E. Geoffroy Saint-Hilaire, 1083) no Brasil. Biodivers Bras 3: 99-106.
Bianchi RDC, Rosa AF, Gatti A, Mendes SL (2011) Diet of margay, Leopardus wiedii, and jaguarundi, Puma yagouaroundi, (Carnivora: Felidae) in Atlantic rainforest, Brazil. Zoologia 28: 127-132.
Caso A, Oliveira T, Carvajal SV (2015) Herpailurus yagouaroundi The IUCN Red List of Threatened Species 2015: e.T9948A50653167. http://dx.doi.org/10.2305/IUCN.UK.2015-2.RLTS.T9948A50653167.en.
Facure KG, Giaretta AA (1996) Food habits of carnivores in a coastal Atlantic Forest of southeastern Brazil. Mammalia 60: 499-502.
Golec C (2012) Dieta de cinco espécies simpátricas de felídeos: Puma concolor (Linnaeus 1771), Puma yagouaroundi (E. Geoffroy, 1803), Leopardus pardalis (Linnaeus 1758), Leopardus wiedii (Schinz, 1821) e Leopardus tigrinus (Schreber, 1775) (Carnivora, Felidae), no Corredor Federal do Iguaçu, região Centro-oeste do Paraná. Dissertação, Universidade Estadual do Paraná, Paranavaí.
Magezi GS (2013) Dieta de felídeos silvestres em áreas de Floresta Atlântica Costeira, litoral Norte do Estado do Paraná. Dissertação, Universidade Federal do Paraná, Curitiba.
Meiorin RP, Kasper CB (2016) Comparação da dieta de quatro felinos simpátricos no Pampa gaúcho. Anais SIEPE 7.
Oliveira TG (1998) Herpailurus yagouaroundi. Mamm Species 578: 1-6
Pereira JES (2009) Dieta de três espécies simpátricas de felídeos - Leopardus pardalis, Leopardus tigrinus e Puma yagouaroundi (Carnivora, felidae) - em floresta ombrófila mista e campos gerais, Paraná, sul do Brasil. Dissertação, Universidade Federal do Paraná, Curitiba.
Rinaldi AR (2010) Dieta de pequenos felinos silvestres (Carnivora, Felidae), em área antropizada de Mata Atlântica de Interior, Alto Rio Paraná, Paraná, Brasil. Dissertação, Universidade Federal do Paraná, Curitiba.
Rocha-Mendes F (2005) Ecologia alimentar de carnívoros (Mammalia: Carnívora) e elementos de Etnozoologia do município de Fênix, Paraná, Brasil. Dissertação, Universidade Estadual Paulista "Júlio de Mesquita", São José do Rio Preto.
Rocha-Mendes F, Mikich SB, Quadros J, Pedro WA (2010) Feeding ecology of carnivores (Mammalia, Carnivora) in Atlantic forest remnants, southern Brazil. Biota Neotrop 10: 21-30.
Silva-Pereira JE, Moro-Rios RF, Bilski DR, Passos FC (2011) Diets of three sympatric Neotropical small cats: Food niche overlap and interspecies differences in prey consumption. Mamm Biol 76: 308-312.
Tófoli CF, Rohe F, Setz EZF (2009) Jaguarundi (Puma yagouaroundi) (Geoffroy, 1803) (Carnivora, Felidae) food habits in a mosaic of Atlantic Rainforest and eucalypt plantations of southeastern Brazil. Braz J Biol 69: 871-877.
MEPHITIDAE
Conepatus semistriatus
Cavalcanti GN (2010) Biologia comportamental de Conepatus semistriatus (Carnivora, Mephitidae) em Cerrado do Brasil Central. Dissertação, Universidade Federal de Minas Gerais, Belo Horizonte.
Cavalcanti GN, Fontoura-Rodrigues ML, Rodrigues FHG, Rodrigues LA (2013) Avaliação do risco de extinção da jaritataca Conepatus semistriatus (Boddaert, 1785) no Brasil. Biodivers Bras 1: 248-254.
Cuarón AD, Helgen K, Reid F (2016) Conepatus semistriatus The IUCN Red List of Threatened Species 2016: e.T41633A45210987. http://dx.doi.org/10.2305/IUCN.UK.2016-1.RLTS.T41633A45210987.en.
Kasper CB, Fontoura-Rodrigues ML, Cavalcanti GN, Freitas TRO, Rodrigues FHG, Oliveira T, Eizirik E (2009) Recent advances in the knowledge of Molina’s hog-nosed skunk Conepatus chinga and striped hog-nosed skunk C. semistriatus in South America. Small Carniv Conserv 41: 25-28.
Conepatus chinga
Castillo DF, Vidal EML, Casanave EB, Lucherini M (2014) Feeding habits of Molina’s hog-nosed skunk in the Pampas grassland of Argentina. Mammalia 78: 473-479.
Donadio E, Di Martino S, Aubone M, Novaro AJ (2004) Feeding ecology of the Andean hog-nosed skunk (Conepatus chinga) in areas under different land use in north-western Patagonia. J Arid Environ 56: 709-718.
Emmons L, Schiaffini M, Schipper J (2016) Conepatus chinga The IUCN Red List of Threatened Species 2016: e.T41630A45210528. http://dx.doi.org/10.2305/IUCN.UK.2016-1.RLTS.T41630A45210528.en.
Kasper CB, Cunha FP, Fontoura-Rodrigues ML (2013) Avaliação do risco de extinção do zorrilho Conepatus chinga (Molina, 1782) no Brasil. Biodivers Bras 1: 240-247.
Kasper CB, Fontoura-Rodrigues ML, Cavalcanti GN, Freitas TRO, Rodrigues FHG, Oliveira T, Eizirik E (2009) Recent advances in the knowledge of Molina’s hog-nosed skunk Conepatus chinga and striped hog-nosed skunk C. semistriatus in South America. Small Carniv Conserv 41: 25-28.
Kasper CB (2011) Ecologia e história natural do zorrilho (Conepatus chinga) no sul do Brasil. Tese, Universidade Federal do Rio Grande do Sul, Porto Alegre.
Medina CE, Díaz CV, Delgado FA, Ynga GA, Zela HF (2009) Dieta de Conepatus chinga (Carnívora: Mephitidae) en un bosque de Polylepis del departamento de Arequipa, Perú. Rev Peru Biol 16: 183-186.
Peters FB, Roth PRDO, Christoff AU (2011) Feeding habits of Molina's hog-nosed skunk, Conepatus chinga (Carnivora: Mephitidae) in the extreme south of Brazil. Zoologia 28: 193-198.
Travaini A, Delibes M, Ceballos O (1998) Summer foods of the Andean hog-nosed skunk (Conepatus chinga) in Patagonia. J Zool 246: 443-486.
MUSTELIDAE
Eira barbara
Bisbal E (1986) Food habits of some neotropical carnivores in Venezuela (Mammalia, Carnivora). Mammalia 50: 329-339.
Cuarón AD, Reid F, Helgen K, González-Maya JF (2016) Eira barbara The IUCN Red List of Threatened Species 2016: e.T41644A45212151. http://dx.doi.org/10.2305/IUCN.UK.2016-1.RLTS.T41644A45212151.en.
Konecny MJ (1989) Movement patterns and food habits of four sympatric carnivore species in Belize, Central America. In Redford K, Eisenberg J (eds) Advances in Neotropical mammalogy. Sandhill Crane Press, Gainesville, Florida. pp. 243-264.
Presley SJ (2000) Eira barbara. Mamm Species 636: 1-6
Rodrigues LA, Pontes ARM, Rocha-Campos CC (2013) Avaliação do risco de extinção da irara Eira barbara (Linnaeus, 1758) no Brasil. Biodivers Bras 1: 195-202.
Soley F (2012) Notes on the flexibility of forangin behaviour in Tayras Eira barbara. Small Carniv Conserv 46: 33-35.
Sunquist ME, Sunquist F, Daneke DE (1989) Ecological separation in a Venezuelan llanos carnivore community. In Redford K, Eisenberg J (eds) Advances in Neotropical mammalogy. Sandhill Crane Press, Gainesville, Florida. pp. 197-232.
Galictis cuja
Delibes M, Travaini A, Zapata SC, Palomares F (2003) Alien mammals and the trophic position of the lesser grison (Galictis cuja) in Argentinean Patagonia. Can J Zool 81: 157-162.
Ebensperger LA, Mella JE, Simonetti JA (1991) Trophic-niche relationships among Galictis cuja, Dusicyon culpaeus, and Tyto alba in central Chile. J Mamm 72: 820-823.
Helgen K, Schiaffini M (2016) Galictis cuja. The IUCN Red List of Threatened Species 2016: e.T41639A45211832. http://dx.doi.org/10.2305/IUCN.UK.2016-1.RLTS.T41639A45211832.en.
Kasper CB, Leuchtenberger C, Bornholdt R, Pontes ARM, Beisiegel BM (2013) Avaliação do risco de extinção do furão Galictis cuja (Molina, 1782) no Brasil. Biodivers Bras 1: 203-210.
Sade S, Rau JR, Orellana JI (2012) Dieta del quique (Galictis cuja Molina 1782) en un remanente de bosque valdiviano fragmentado del sur de Chile. Gayana 76: 112-116.
Yensen E, Tarifa T (2003) Galictis cuja. Mamm Species 728: 1-8
Zapata SC, Travaini A, Delibes M, Martínez-Peck R (2005) Annual food habits of the lesser grison (Galictis cuja) at the southern limit of its range. Mammalia 69: 85-88.
Galictis vittata
Bisbal E (1986) Food habits of some neotropical carnivores in Venezuela (Mammalia, Carnivora). Mammalia 50: 329-339.
Cuarón AD, Reid F, González-Maya JF, Helgen K (2016) Galictis vittata The IUCN Red List of Threatened Species 2016: e.T41640A45211961. http://dx.doi.org/10.2305/IUCN.UK.2016-1.RLTS.T41640A45211961.en.
Kasper CB, Bornholdt R, Rodrigues LA (2013) Avaliação do risco de extinção do furão-grande Galictis vittata (Schreber, 1776) no Brasil. Biodivers Bras 1: 211-215.
Nowak RM (2005) Walker’s Carnivores of the World Johns Hopkins University Press, Baltimore, USA and London, UK.
Sunquist ME, Sunquist F, Daneke DE (1989) Ecological separation in a Venezuelan llanos carnivore community. In Redford K, Eisenberg J (eds) Advances in Neotropical mammalogy. Sandhill Crane Press, Gainesville, Florida. pp. 197-232.
Yensen E, Tarifa T (2003) Galictis vittata. Mamm Species 727: 1-8.
Lontra longicaudis
Brandt AP (2004) Dieta e uso do habitat por Lontra longicaudis (Carnivora: Mustelidae) no Parque Estadual de Itapuã, Viamão, RS. Dissertação, Universidade Federal do Rio Grande do Sul, Porto Alegre.
Carvalho-Junior O, Macedo-Soares LD, Birolo AB (2010) Annual and interannual food habits variability of a Neotropical otter (Lontra longicaudis) population in Conceição Lagoon, South of Brazil. IUCN Otter Spec Group Bull 27: 24-32.
Helder J, Andrade HK (1997) Food habitats of the neotropical river otter Lontra longicaudis (Carnivora: Mustelidae). Mammalia 61: 193-203.
Kasper CB, Bastazini VAG, Salvi J, Grillo HCZ (2008) Trophic ecology and the use of shelters and latrines by the Neotropical otter (Lontra longicaudis) in the Taquari Valley, Southern Brazil. Iheringia, Sér Zool 98: 469-474.
Kasper CB, Feldens MJ, Salvi J, Grillo HZ (2004) Estudo preliminar sobre a ecologia de Lontra longicaudis (Olfers) (Carnivora, Mustelidae) no Vale do Taquari, Sul do Brasil. Rev Bras Zool 21: 65-72.
Larivière S (1999) Lontra longicaudis. Mamm Species 609: 1-5.
Navarro MA (2015) Ocorrência e dieta da lontra neotropical, Lontra longicaudis (Olfers, 1818), em dois rios do Parque Nacional de Saint-Hilaire/Lange, Serra da Prata, Paraná. Dissertação, Universidade Federal do Paraná, Curitiba.
Pardini R (1998) Feeding ecology of the neotropical river otter Lontra longicaudis in an Atlantic Forest stream, south‐eastern Brazil. J Zool 245: 385-391.
Quadros J, Monteiro-Filho EL (2001) Diet of the neotropical otter, Lontra longicaudis, in an Atlantic forest area, Santa Catarina State, southern Brazil. Stud Neotrop Fauna E 36: 15-21.
Quintela FM, Artioli LGS, Porciuncula RA (2012) Diet of Lontra longicaudis (Olfers, 1818) (Carnivora: Mustelidae) in three limnic systems in Southern Rio Grande do Sul State, Brazil. Braz Arch Biol Technol 55: 877-886.
Quintela FM, Porciuncula RA, Colares EP (2008) Dieta de Lontra longicaudis (Olfers) (Carnivora, Mustelidae) em um arroio costeiro da região sul do Estado do Rio Grande do Sul, Brasil. Neotrop Biol Conserv 3: 119-125.
Rheingantz ML, Trinca CS (2015) Lontra longicaudis The IUCN Red List of Threatened Species 2015: e.T12304A21937379. http://dx.doi.org/10.2305/IUCN.UK.2015-2.RLTS.T12304A21937379.en.
Santos FAP (2011) Distribuição espaço-temporal e dieta de Lontra longicaudis (Carnivora: Mustelidae) em região costeira do sul do RS. Dissertação, Universidade Federal do Rio Grande, Rio Grande.
Santos LB, Reis NRD, Orsi ML (2012) Trophic ecology of Lontra longicaudis (Carnivora, Mustelidae) in lotic and semilotic environments in southeastern Brazil. Iheringia, Sér Zool 102: 261-268.
Silva FA, Nascimento EM, Quintela FM (2012) Diet of Lontra longicaudis (Carnivora: Mustelidae) in a pool system in Atlantic Forest of Minas Gerais State, southeastern Brazil. Acta Scientiarum. Biol Sci 34: 407-412.
Silva VCF, Rheingantz ML, Fernandez FA (2007) Dieta da lontra neotropical (Lontra longicaudis): uma comparação entre dois métodos para estimativa da importância de diferentes presas em sua alimentação. Anais do VIII Congresso de Ecologia do Brasil, Caxambu-MG.
Souza KS, Bastazini VA, Colares EP (2013) Feeding ecology of the Neotropical otter Lontra longicaudis in the Lower Arroio Grande River, southern Brazil. An Acad Bras Ciênc 85: 285-294.
Pteronura brasiliensis
Cabral MM, Zuanon J, Mattos GE, Rosas FC (2010) Feeding habits of giant otters Pteronura brasiliensis (Carnivora: Mustelidae) in the Balbina hydroelectric reservoir, Central Brazilian Amazon. Zoologia 27: 47-53.
Carter SK, Rosas FC (1997) Biology and conservation of the giant otter Pteronura brasiliensis. Mammal Rev 27:1-26.
Groenendijk J, Duplaix N, Marmontel M, Van Damme P, Schenck C (2015) Pteronura brasiliensis. The IUCN Red List of Threatened Species 2015: e.T18711A21938411. http://dx.doi.org/10.2305/IUCN.UK.2015-2.RLTS.T18711A21938411.en.
Rodrigues LA, Leuchtenberger C, Silva VCF (2013) Avaliação do risco de extinção da ariranha Pteronura brasiliensis (Zimmermann, 1780) no Brasil. Biodivers Bras 1: 228-239.
Rosas FC, Zuanon JA, Carter SK (1999) Feeding ecology of the giant otter, Pteronura brasiliensis. Biotropica 31: 502-506.
Rosas‐Ribeiro PF, Rosas FC, Zuanon J (2012) Conflict between fishermen and giant otters Pteronura brasiliensis in Western Brazilian Amazon. Biotropica 44: 437-444.
Silva RE, Rosas FCW, Zuanon J (2013) Feeding ecology of the giant otter (Pteronura brasiliensis) and the Neotropical otter (Lontra longicaudis) in Jaú National Park, Amazon, Brazil. J Nat Hist 48: 465-479.
PROCYONIDAE
Nasua nasua
Aguiar LM, Moro-Rios RF, Silvestre T, Silva-Pereira JE, Bilski DR, Passos FC, Sekiama ML, Rocha, VJ (2011) Diet of brown-nosed coatis and crab-eating raccoons from a mosaic landscape with exotic plantations in southern Brazil. Stud Neotrop Fauna Environ 46: 153-161.
Alves-Costa CP, Eterovick PC (2007) Seed dispersal services by coatis (Nasua nasua, Procyonidae) and their redundancy with other frugivores in southeastern Brazil. Acta Oecol 32: 77-92.
Alves-Costa CP, Fonseca GA, Christófaro C (2004) Variation in the diet of the brown-nosed coati (Nasua nasua) in southeastern Brazil. J Mamm 85: 478-482.
Amaral C (2007) Dieta de duas espécies carnívoras simpátricas - Graxaim-do-mato Cerdocyon thous (Linnaeus, 1766) e Quati Nasua nasua (Linnaeus, 1766) nos municípios de Tijucas do Sul, estado do Paraná. Dissertação, Universidade Federal do Paraná, Curitiba.
Beisiegel BM, Campos CB (2013) Avaliação do risco de extinção do quati Nasua nasua (Linnaeus, 1766) no Brasil. Biodivers Bras 1: 269-276.
Emmons L, Helgen K (2016) Nasua nasua The IUCN Red List of Threatened Species 2016: e.T41684A45216227. http://dx.doi.org/10.2305/IUCN.UK.2016-1.RLTS.T41684A45216227.en.
Gompper ME, Decker DM (1998) Nasua nasua. Mamm Species 580 :1-9.
Rodrigues DHD, Silva IO, Oliveira VS, Souza VB, Brinat A, Filó LM, Linhares BS, Lima Filho RCC, Cesário C, Repolês RB (2015) Dieta dos quatis (Procyonidae: Nasua nasua) em uma área de uso público do Parque Nacional do Caparaó. XII Congresso de Ecologia do Brasil, São Lourenço, MG.
Santos VA, Beisiegel BM (2006) A dieta de Nasua nasua (Linnaeus, 1766) no Parque Ecológico do Tietê, SP. Rev Bras Zool 8: 199-203.
Potos flavus
Bisbal E (1986) Food habits of some neotropical carnivores in Venezuela (Mammalia, Carnivora). Mammalia 50: 329-339.
Ford LS, Hoffmann RS (1988) Potos flavus. Mamm Species 321: 1-9.
Helgen K, Kays R, Schipper J (2016) Potos flavus The IUCN Red List of Threatened Species 2016: e.T41679A45215631. http://dx.doi.org/10.2305/IUCN.UK.2016-1.RLTS.T41679A45215631.en.
Julien-Lafèrriere D (1999) Foraging strategies and food partitioning in the neotropical frugivorous mammals Caluromys philander and Potos flavus. J Zool 247: 71-80.
Kays RW (1999) Food preferences of kinkajous (Potos flavus): A frugivorous carnivore. J Mamm 80: 589-599.
Sampaio R, Pontes ARM, Beisiegel BM (2013) Avaliação do risco de extinção do jupará Potos flavus (Schreber, 1774) no Brasil. Biodivers Bras 3: 277-282.
Procyon cancrivorus
Aguiar LM, Moro-Rios RF, Silvestre T, Silva-Pereira JE, Bilski DR, Passos FC, Sekiama ML, Rocha VJ (2011) Diet of brown-nosed coatis and crab-eating raccoons from a mosaic landscape with exotic plantations in southern Brazil. Stud Neotrop Fauna Environ 46: 153-161.
Cheida CC, Guimarães FH, Beisiegel BM (2013) Avaliação do risco de extinção do Guaxinim Procyon cancrivorus (Cuvier, 1798) no Brasil. Biodivers Bras 3: 283-290.
Gatti A, Bianchi R, Rosa CRX, Mendes SL (2006) Diet of two sympatric mesocarnivores, Cerdocyon thous and Procyon cancrivorus, in a restinga area of Espirito Santo State, Brazil. J Trop Ecol 22: 227-230.
Martinelli MM, Volpi TA (2010) Diet of racoon Procyon cancrivorus (Carnivora, Procyonidae) in a mangrove and restinga area in Espirito Santo state, Brazil. Natureza on-line 8: 150-151.
Mazanek ML (2008) Sobreposição de dieta em duas espécies simpátricas de carnívoros na Ilha de Cananéia, Estado de São Paulo. Monografia, Universidade Federal do Paraná, Curitiba.
Pellanda M, Castro Almeida CM, Santos MDFM, Hartz SM (2010) Dieta do mão-pelada (Procyon cancrivorus, Procyonidae, Carnivora) no Parque Estadual de Itapuã, sul do Brasil. Neotrop Biol Conserv 5: 154-159.
Quintela FM, Iob G, Artioli LG (2014) Diet of Procyon cancrivorus (Carnivora, Procyonidae) in restinga and estuarine environments of southern Brazil. Iheringia, Sér Zool 104: 143-149.
Reid F, Helgen K, González-Maya JF (2016) Procyon cancrivorus The IUCN Red List of Threatened Species 2016: e.T41685A45216426. http://dx.doi.org/10.2305/IUCN.UK.2016-1.RLTS.T41685A45216426.en.
LAGOMORPHA
LEPORIDAE
Sylvilagus brasiliensis
Mexican Association for Conservation and Study of Lagomorphs (AMCELA), Romero Malpica FJ, Rangel Cordero, H (2008) Sylvilagus brasiliensis The IUCN Red List of Threatened Species 2008:e.T41298A10418161.http://dx.doi.org/10.2305/IUCN.UK.2008.RLTS.T41298A10418161.en.
Reis NR, Ortêncio Filho H, Silveira G (2006) Ordem Lagomorpha. In Reis NR, Perachi AL, Pedro WA, Lima IP (eds) Mamíferos do Brasil. Londrina. pp. 151-154.
Valero L, Durant P (2001) Análisis de la dieta del conejo de páramo, S. brasiliensis meridensis Thomas, 1904 (Lagomorpha: Leporidae) en Mucubaji, Mérida, Venezuela. Rev Ecol Lat Am 8: 1-13.
RODENTIA
CAVIIDAE
Cavia aperea
Bernal N (2016) Cavia aperea The IUCN Red List of Threatened Species 2016: e.T86257782A22189256. http://dx.doi.org/10.2305/IUCN.UK.2016-2.RLTS.T86257782A22189256.en.
Guichón ML, Cassini MH (1998) Role of diet selection in the use of habitat by pampas cavies Cavia aperea pamparum (Mammalia, Rodentia). Mammalia 62: 23-36.
Cavia fulgida
Amori G (2016) Cavia fulgida The IUCN Red List of Threatened Species 2016: eT4065A22188918 http://dx.doi.org/10.2305/IUCN.UK.2016-2.RLTS.T4065A22188918.en.
Cavia intermedia
Cherem JJ, Olimpio J, Ximenez A (1999) Descrição de uma nova espécie do gênero Cavia Pallas, 1766 (Mammalia-Caviidae) das Ilhas dos Moleques do Sul, Santa Catarina, Sul do Brasil. Biotemas 12: 95-117.
Roach N (2016) Cavia intermedia The IUCN Red List of Threatened Species 2016: e.T136520A22189125. http://dx.doi.org/10.2305/IUCN.UK.2016-2.RLTS.T136520A22189125.en.
Salvador CH, Fernandez FA (2008) Population dynamics and conservation status of the insular cavy Cavia intermedia (Rodentia: Caviidae). J Mamm 89: 721-729.
Cavia magna
Gonzalez E (2016) Cavia magna The IUCN Red List of Threatened Species 2016: e.T4066A22188832. http://dx.doi.org/10.2305/IUCN.UK.2016-2.RLTS.T4066A22188832.en.
Veiga KRD (2013) Preferência alimentar do preá (Cavia magna Ximenez 1980), em uma ilha subtropical no sul do Brasil. Dissertação, Universidade Federal do Rio Grande, Rio Grande.
Hydrochoerus hydrochaeris
Borges LDV, Colares IG (2007) Feeding habits of capybaras (Hydrochoerus hydrochaeris, Linnaeus 1766), in the Ecological Reserve of Taim (ESEC-Taim) - south of Brazil. Braz Arch Biol Technol 50: 409-416.
Felix GA (2012) Comportamento alimentar e qualidade de carne de capivara (Hydrochoerus hydrochaeris Linnaeus, 1766) de vida livre, em áreas agrícolas. Dissertação, Universidade Federal da Grande Dourados, Dourados.
Mones A, Ojasti J (1986) Hydrochoerus hydrochaeris. Mamm Species 264 :1-7.
Reid F (2016) Hydrochoerus hydrochaeris The IUCN Red List of Threatened Species 2016: e.T10300A22190005. http://dx.doi.org/10.2305/IUCN.UK.2016-2.RLTS.T10300A22190005.en.
Silva IV, Hayashi MM (2005) Comportamento alimentar de Hydrochoerus hydrochaeris no Parque Ecológico do Tietê, Barueri, São Paulo. Revista PIBIC 2: 13-20.
Tonetti A, Biondi D (2015) Dieta de capivara (Hydrochoerus hydrochaeris, Linnaeus, 1766) em ambiente urbano, Parque Municipal Tingui, Curitiba-PR. Acta Vet Brasilica 9: 316-326.
CUNICULIDAE
Cuniculus paca
Beck–King H, Helversen OV, Beck–King R (1999) Home range, population density, and food resources of Agouti paca (Rodentia: Agoutidae) in Costa Rica: a study using alternative methods. Biotropica 31: 675-685.
Collett SF (1981) Population characteristics of Agouti paca (Rodentia) in Colombia. Publications of the Museum, Biological Series 5. Michigan State University, East Lansing. pp. 485-602.
Dubost G, Henry O (2006) Comparison of diets of the acouchy, agouti and paca, the three largest terrestrial rodents of French Guianan forests. J Trop Ecol 22: 641-651.
Emmons L (2016) Cuniculus paca The IUCN Red List of Threatened Species 2016: e.T699A22197347. http://dx.doi.org/10.2305/IUCN.UK.2016-2.RLTS.T699A22197347.en.
Gallina S (1981) Contribución al conocimiento de los hábitos de alimentación del “tepezcuintle” (Agouti paca) en Lancajá-Chansayab, Chiapas. In Pedro RC (ed) Estudios Ecológicos en el Trópico Mexicano. Instituto de Ecología, AC México DF, México. pp. 55-57.
Pérez EM (1992) Agouti paca. Mamm Species 404: 1-7.
Zucaratto R, Carrara R, Franco BKS (2011) Dieta da paca (Cuniculus paca) usando métodos indiretos numa área de cultura agrícola na Floresta Atlântica brasileira. Biotemas 23: 235-239.
DASYPROCTIDAE
Dasyprocta azarae
Catzeflis F, Patton J, Percequillo A, Weksler M (2016) Dasyprocta azarae The IUCN Red List of Threatened Species 2016: e.T6278A22198654. http://dx.doi.org/10.2305/IUCN.UK.2016-2.RLTS.T6278A22198654.en.
Dasyprocta leporina
Dubost G, Henry O (2006) Comparison of diets of the acouchy, agouti and paca, the three largest terrestrial rodents of French Guianan forests. J Trop Ecol 22: 641-651.
Emmons L, Reid F (2016) Dasyprocta leporina The IUCN Red List of Threatened Species 2016: e.T89497102A22197762. http://dx.doi.org/10.2305/IUCN.UK.2016-2.RLTS.T89497102A22197762.en.
Henry O (1999) Frugivory and the importance of seeds in the diet of the orange-rumped agouti (Dasyprocta leporina) in French Guiana. J Trop Ecol 15: 291-300.
Santos EF (2005) Ecologia da cutia Dasyprocta leporina (Linnaeus, 1758) em um fragmento florestal urbano em Campinas-SP (Rodentia: Dasyproctidae). Tese, Universidade Estadual Paulista "Júlio de Mesquita Filho", Rio Claro.
Dasyprocta prymnolopha
Catzeflis F, Patton J, Percequillo A, Weksler M (2016) Dasyprocta prymnolopha. The IUCN Red List of Threatened Species 2016: e.T6286A22198296. http://dx.doi.org/10.2305/IUCN.UK.2016-2.RLTS.T6286A22198296.en.
ECHIMYIDAE
Myocastor coypus
Borgnia M, Galante ML, Cassini, MH (2000) Diet of the coypu (nutria, Myocastor coypus) in agro-systems of Argentinean pampas. J Wildl Manage 64: 354-361.
Colares IG, Oliveira RN, Liveira RM, Colares EP (2010) Feeding habits of coypu (Myocastor coypus Molina 1978) in the wetlands of the Southern region of Brazil. An Acad Bras Ciênc 82: 671-678.
Galende GI, Troncoso A, Lambertucci SA (2013) Effects of coypu (Myocastor coypus) abundances and diet selection on a wetland of the Patagonian steppe. Stud Neotrop Fauna Environ 48: 32-39.
Guichón ML, Benitez VB, Abba A, Borgnia M, Cassini MH (2003) Foraging behaviour of coypus Myocastor coypus: why do coypus consume aquatic plants? Acta Oecol 24: 241-246.
Ojeda R, Bidau C, Emmons L (2016) Myocastor coypus The IUCN Red List of Threatened Species 2016: e.T14085A78321087. http://dx.doi.org/10.2305/IUCN.UK.2016-3.RLTS.T14085A78321087.en.
Woods CA, Contreras L, Willner-Chapman G, Whidden HP (1992) Myocastor coypus. Mamm Species 398: 1-8.
ERETHIZONTIDAE
Chaetomys subspinosus
Catzeflis F, Patton J, Percequillo A, Bonvicino C, Weksler M (2008) Chaetomys subspinosus. The IUCN Red List of Threatened Species 2008: e.T4366A10812988. http://dx.doi.org/10.2305/IUCN.UK.2008.RLTS.T4366A10812988.en.
Chiarello AG, Passamani M, Zortéa M (1997) Field observations on the thin-spined porcupine, Chaetomys subspinosus (Rodentia; Echimyidae). Mammalia 61: 29-36.
Giné GAF, Duarte JMB, Faria D (2010) Feeding ecology of a selective folivore, the thin-spined porcupine (Chaetomys subspinosus) in the Atlantic forest. J Mamm 91: 931-941.
Oliveira PA (2006) Ecologia de fêmeas de ouriço-preto Chaetomys subspinosus (Olfers 1818) (Rodentia: Erethizontidae) nas florestas de restinga do Parque Estadual Paulo César Vinha, Guarapari, Espírito Santo. Dissertação, Pontifícia Universidade Católica de Minas Gerais, Belo Horizonte.
Souto Lima RB, Oliveira PA, Chiarello AG (2010) Diet of the thin-spined porcupine (Chaetomys subspinosus), an Atlantic forest endemic threatened with extinction in southeastern Brazil. Mamm Biol 75: 538-546.
Coendou insidious
Roach N, Naylor L (2016) Coendou insidiosus The IUCN Red List of Threatened Species 2016: e.T20631A22213745. http://dx.doi.org/10.2305/IUCN.UK.2016-2.RLTS.T20631A22213745.en.
Voss RS (2015) Family Erethizontidae Bonaparte, 1845. In Patton JL, Pardiñas UFJ, D'Elía G (eds) Mammals of South America. The University of Chicago Press, Chicago. pp. 786-805
Coendou prehensilis
Charles-Dominique P, Atramentowicz M, Charles-Dominique M, Gerard H, Hladik A, Hladik CM, Prévost MF (1981) Les mammiferes frugivores arboricoles nocturnes d'une foret guyanaise: inter-relations plantes-animaux. Rev Ecol Terre Vie 35: 341-435.
Marinho-Filho J, Emmons L (2016) Coendou prehensilis The IUCN Red List of Threatened Species 2016: e.T101228458A22214580. http://dx.doi.org/10.2305/IUCN.UK.2016-2.RLTS.T101228458A22214580.en.
Roberts M, Brand S, Maliniak E (1985) The biology of captive prehensile-tailed porcupines, Coendou prehensilis. J Mamm 66: 476-482.
Santos-Junior TS (1998) Monitoramento de Coendou prehensilis (Rodentia: Erethizonthidae) resgatados no reservatório da Usina Hidrelétrica de Miranda (MG) e translocados para a Reserva do Jacob, Nova Ponte–MG. Dissertação, Universidade Federal de Brasília, Brasília.
Voss RS (2015) Family Erethizontidae Bonaparte, 1845. In Patton JL, Pardiñas UFJ, D'Elía G (eds) Mammals of South America. The University of Chicago Press, Chicago. pp. 786-805.
Coendou spinosus
Abreu TCKD, Rosa CAD, Aximoff I, Passamani M (2016) New record of feeding behavior by the porcupine Coendou spinosus (F. Cuvier, 1823) in high-altitude grassland of the Brazilian Atlantic Forest. Mammalia 81: 523-526.
Passamani M (2010) Use of space and activity pattern of Sphiggurus villosus (F Cuvier, 1823) from Brazil (Rodentia: Erethizontidae). Mammn Biol 75: 455-458.
Roach N, Naylor L (2016) Coendou spinosus The IUCN Red List of Threatened Species 2016: e.T20630A22213974. http://dx.doi.org/10.2305/IUCN.UK.2016-2.RLTS.T20630A22213974.en.
Voss RS (2015) Family Erethizontidae Bonaparte, 1845. In Patton JL, Pardiñas UFJ, D'Elía G (eds) Mammals of South America. The University of Chicago Press, Chicago. pp. 786-805.
SCIURIDAE
Guerlinguetus brasiliensis
Amori G (2016) Sciurus aestuans. The IUCN Red List of Threatened Species 2016: e.T20003A22248406. http://dx.doi.org/10.2305/IUCN.UK.2016-2.RLTS.T20003A22248406.en.
Andrade RB (2007) Comportamento alimentar do esquilo Sciurus ingrami (Rondetia: Sciuridae). Dissertação, Universidade Estadual de Campinas, Campinas.
Bordignon M, Monteiro-Filho EL (1999) Seasonal food resources of the squirrel Sciurus ingrami in a secondary Araucaria Forest in southern Brazil. Stud Neotrop Fauna Environ 34: 137-140.
Macêdo JT (2014) Comportamento alimentar de Sciurus ingrami (Mammalia: Rodentia): interação trófica com a palmeira jerivá Syagrus romanzoffiana (Arecaceae) e o coleóptero concorrente Revena rubiginosa. Monografia, Universidade Estadual Paulista "Júlio de Mesquita Filho", Botucatu.
Mendes CP, Cândido-Jr. JF (2014) Behavior and foraging technique of the Ingram's squirrel Guerlinguetus ingrami (Sciuridae: Rodentia) in an Araucaria moist forest fragment. Zoologia 31: 209-214.
Miranda JM (2005) Dieta de Sciurus ingrami Thomas (Rodentia, Sciuridae) em um remanescente de floresta com Araucária, Paraná, Brasil. Rev Bras Zool 22: 1141-1145.
Paschoal M, Galetti M (1995) Seasonal food use by the neotropical squirrel Sciurus ingrami in southeastern Brazil. Biotropica 27: 268-273.
Ribeiro LF, Conde LOM, Guzzo LC, Papalambropoulos PR (2009) Behavioral patterns of Guerlinguetus ingrami (Thomas, 1901) from three natural populations in Atlantic forest fragments in Espirito Santo state, Southeastern Brazil. Natureza on line 7: 92-96.
