# Supplementary material
Source: Elsevier journal article supplement (https://www.sciencedirect.com/science/article/pii/S2530064421000213)
Supplement: mmc5 [file S2530064421000213:mmc5.docx]

**Appendix 5.** Maps of patch size and predictions for species richness, mean body mass and the 10 ecological functions performed by assemblages of medium- and large-sized mammals of the Atlantic Forest, Brazil.


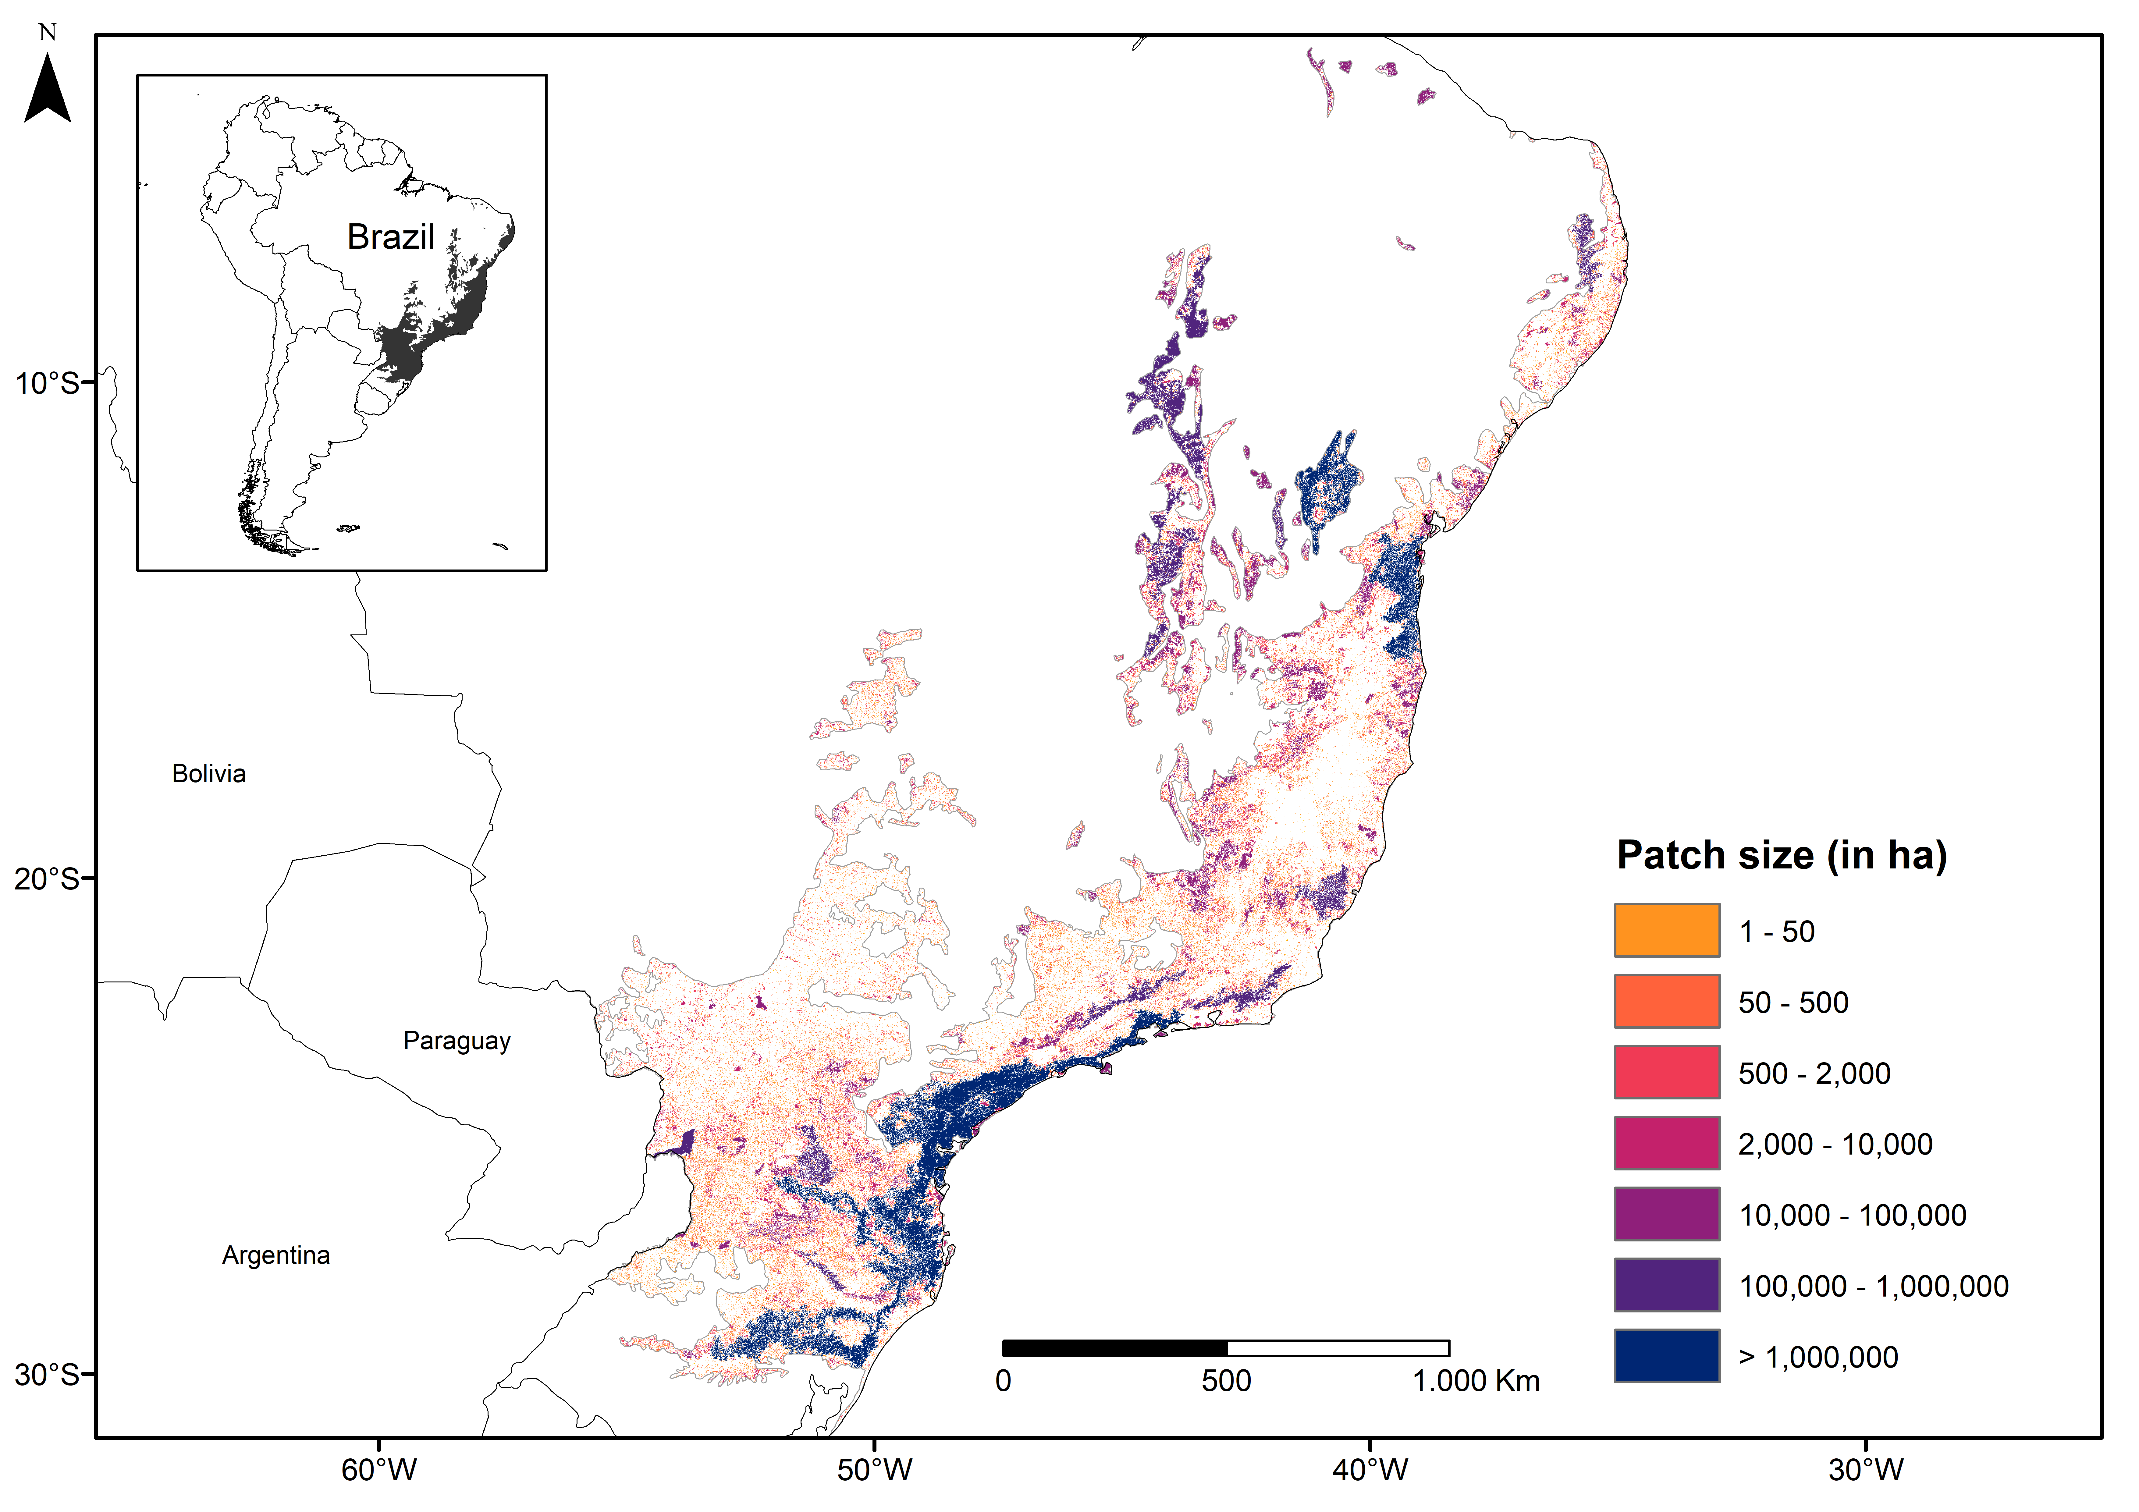


**Figure S20.** Map of patch size (in ha) of Atlantic Forest remnants in Brazil.


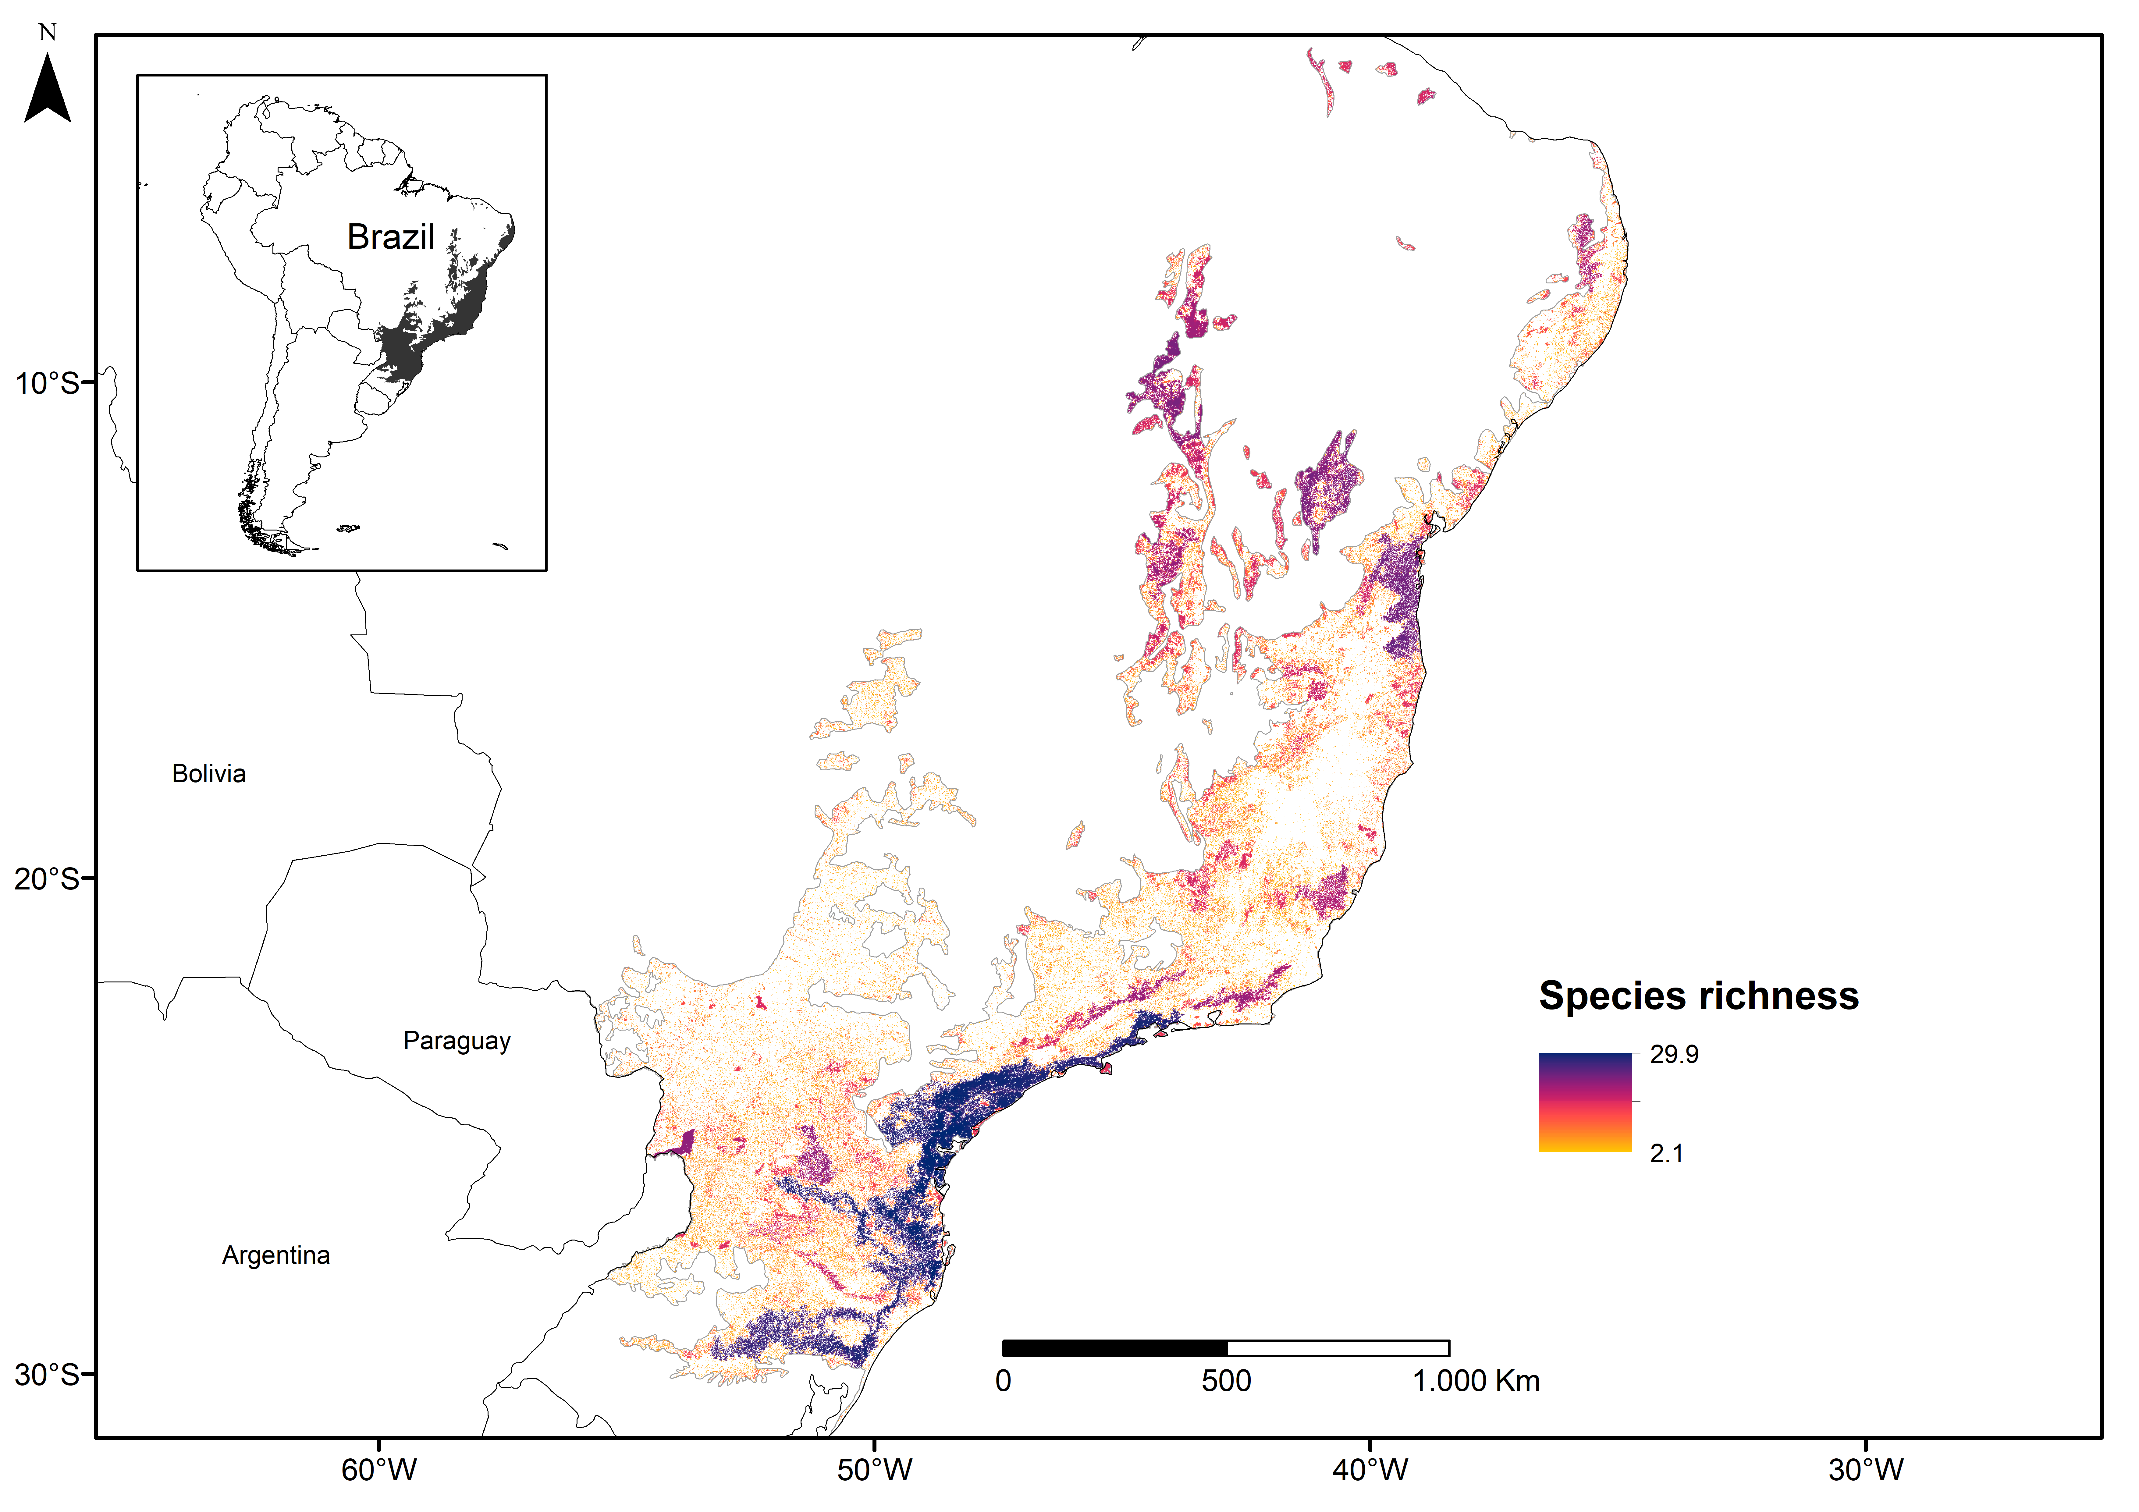


**Figure S21.** Predictions for the species richness of assemblages of medium- and large-sized mammals of the Atlantic Forest, Brazil.


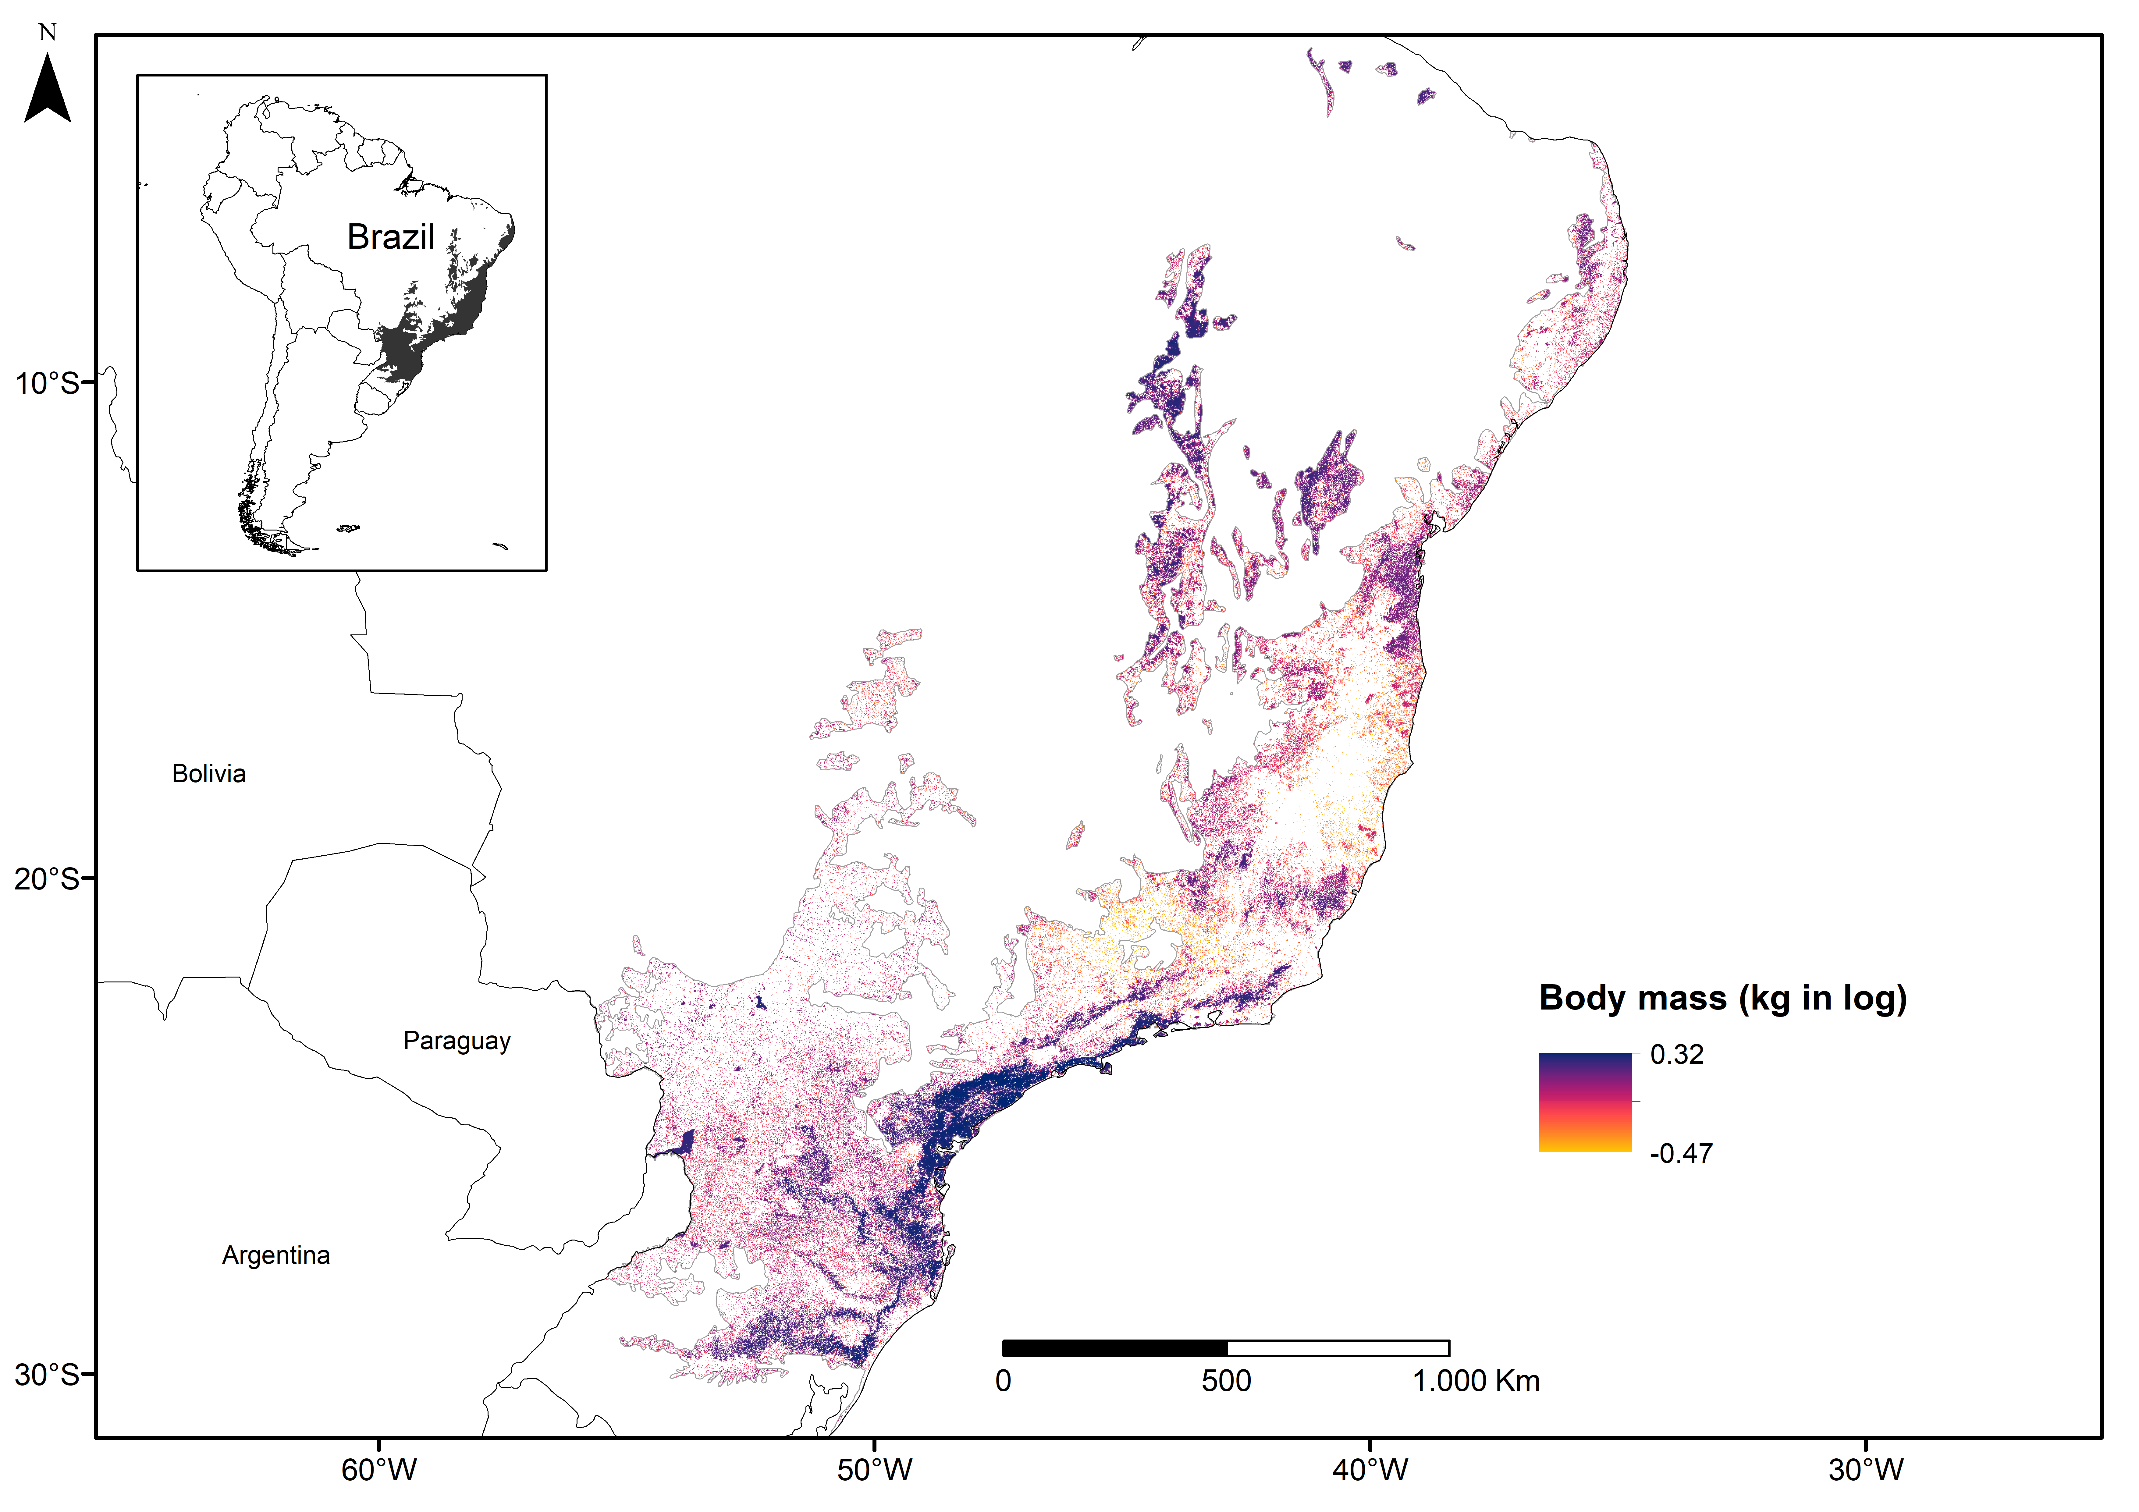


**Figure S22.** Predictions for the mean body mass (kg in log) of assemblages of medium- and large-sized mammals of the Atlantic Forest, Brazil.


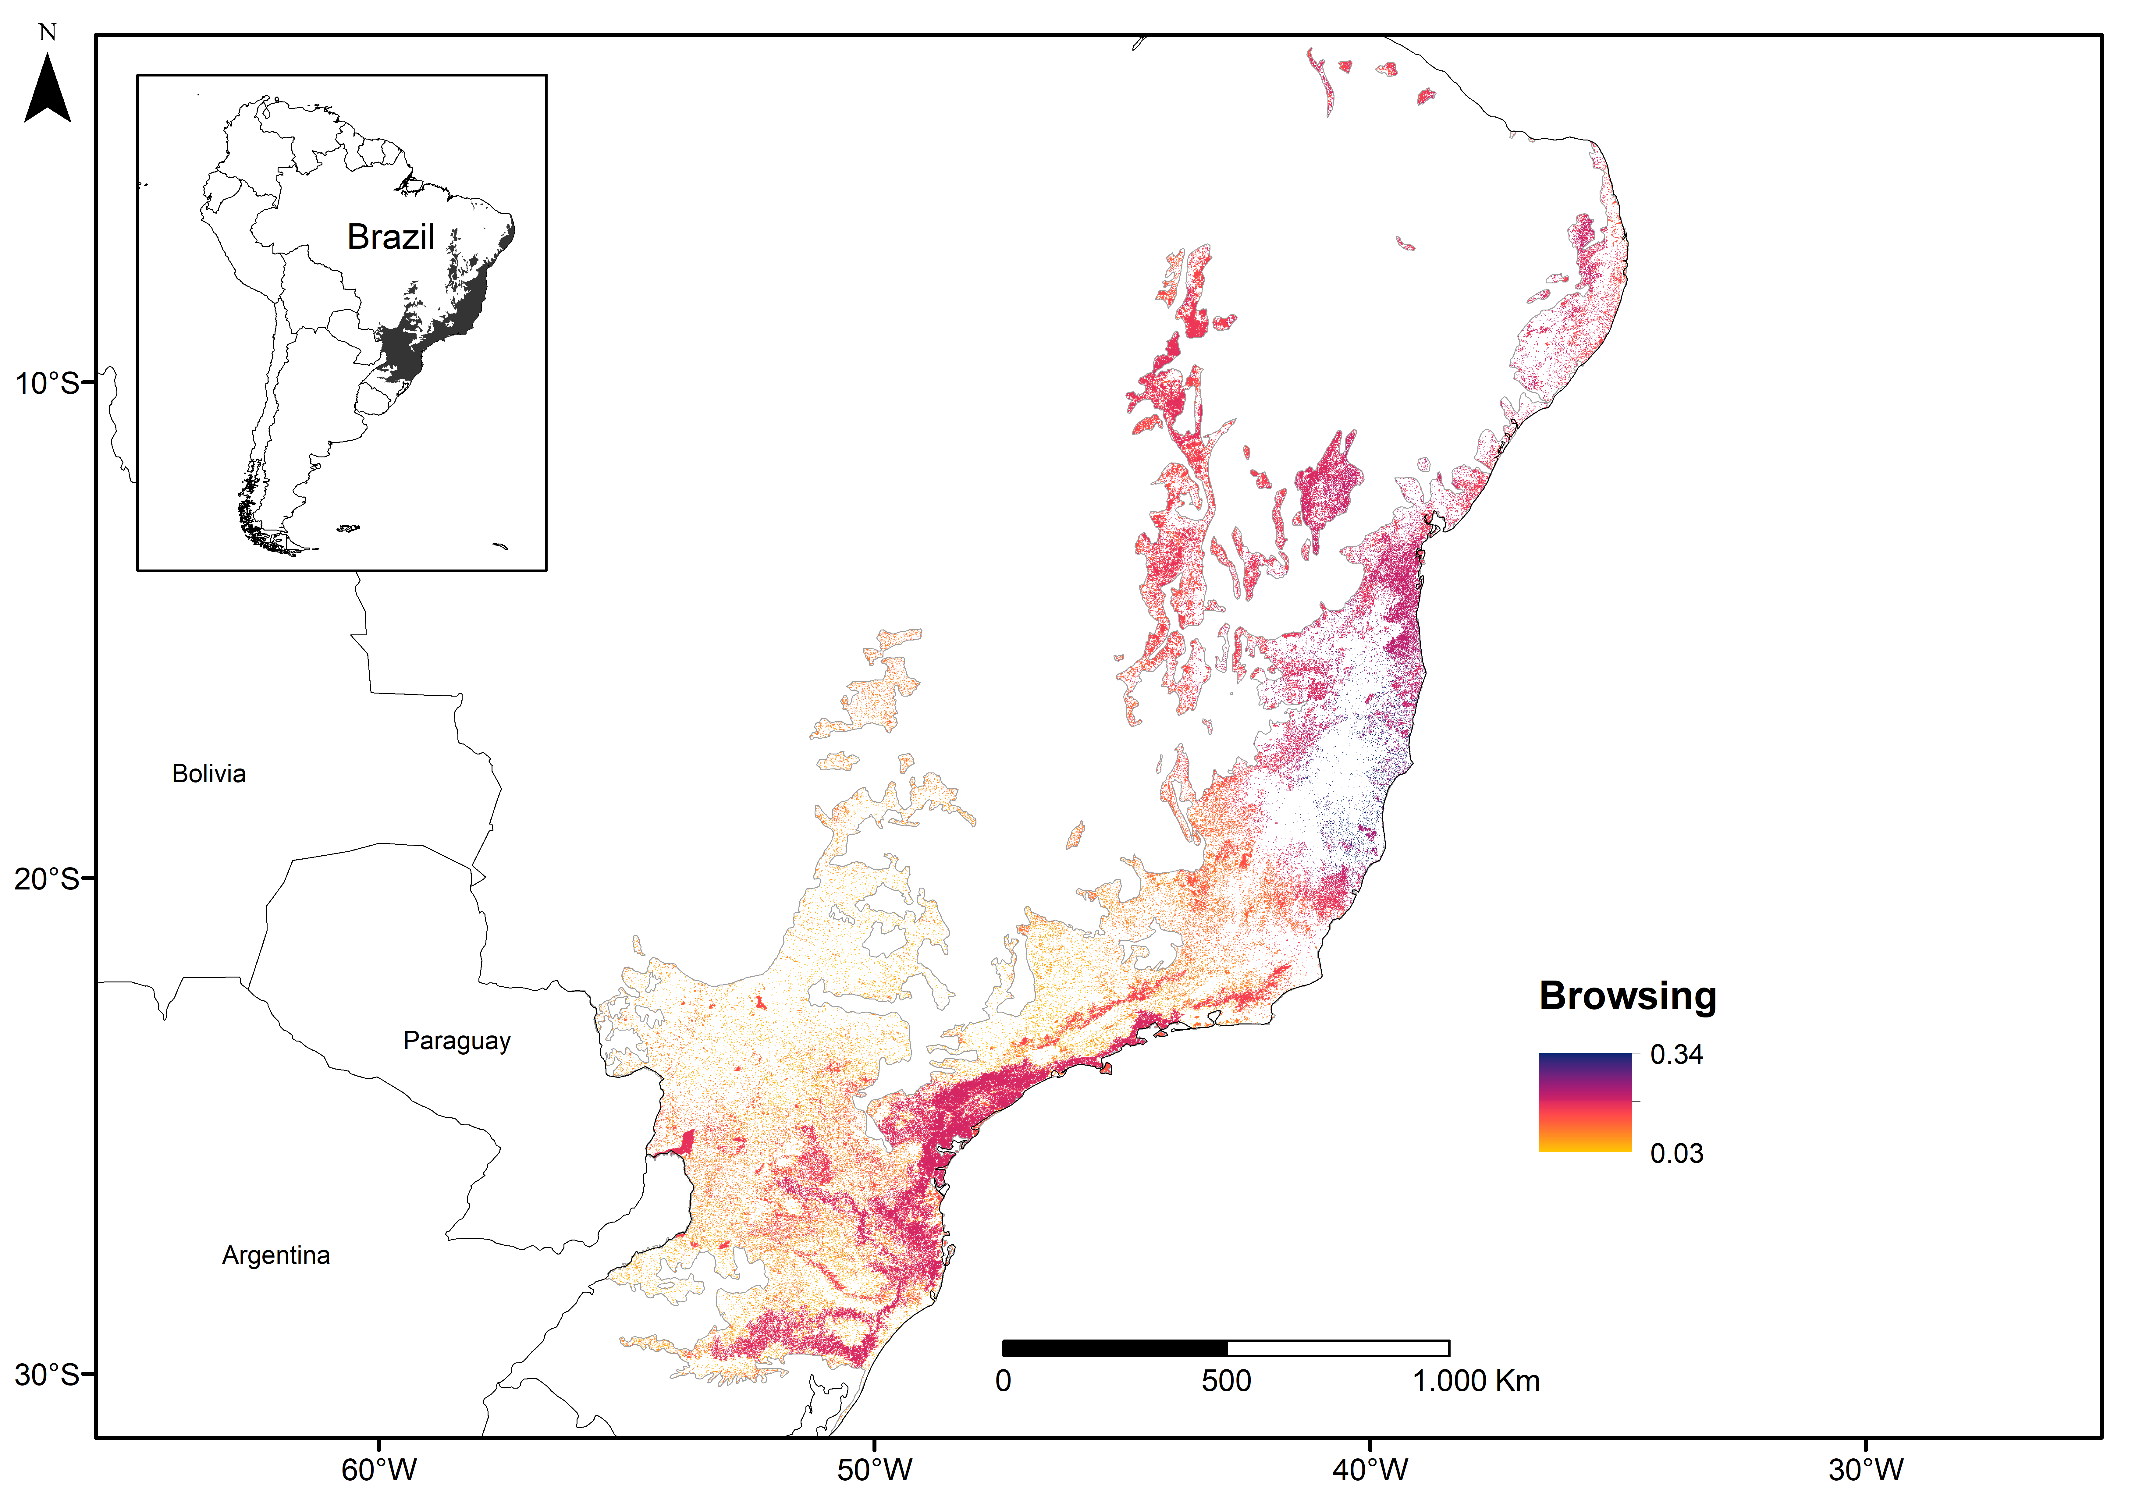


**Figure S23.** Predictions for the browsing function performed by assemblages of medium- and large-sized mammals of the Atlantic Forest, Brazil.


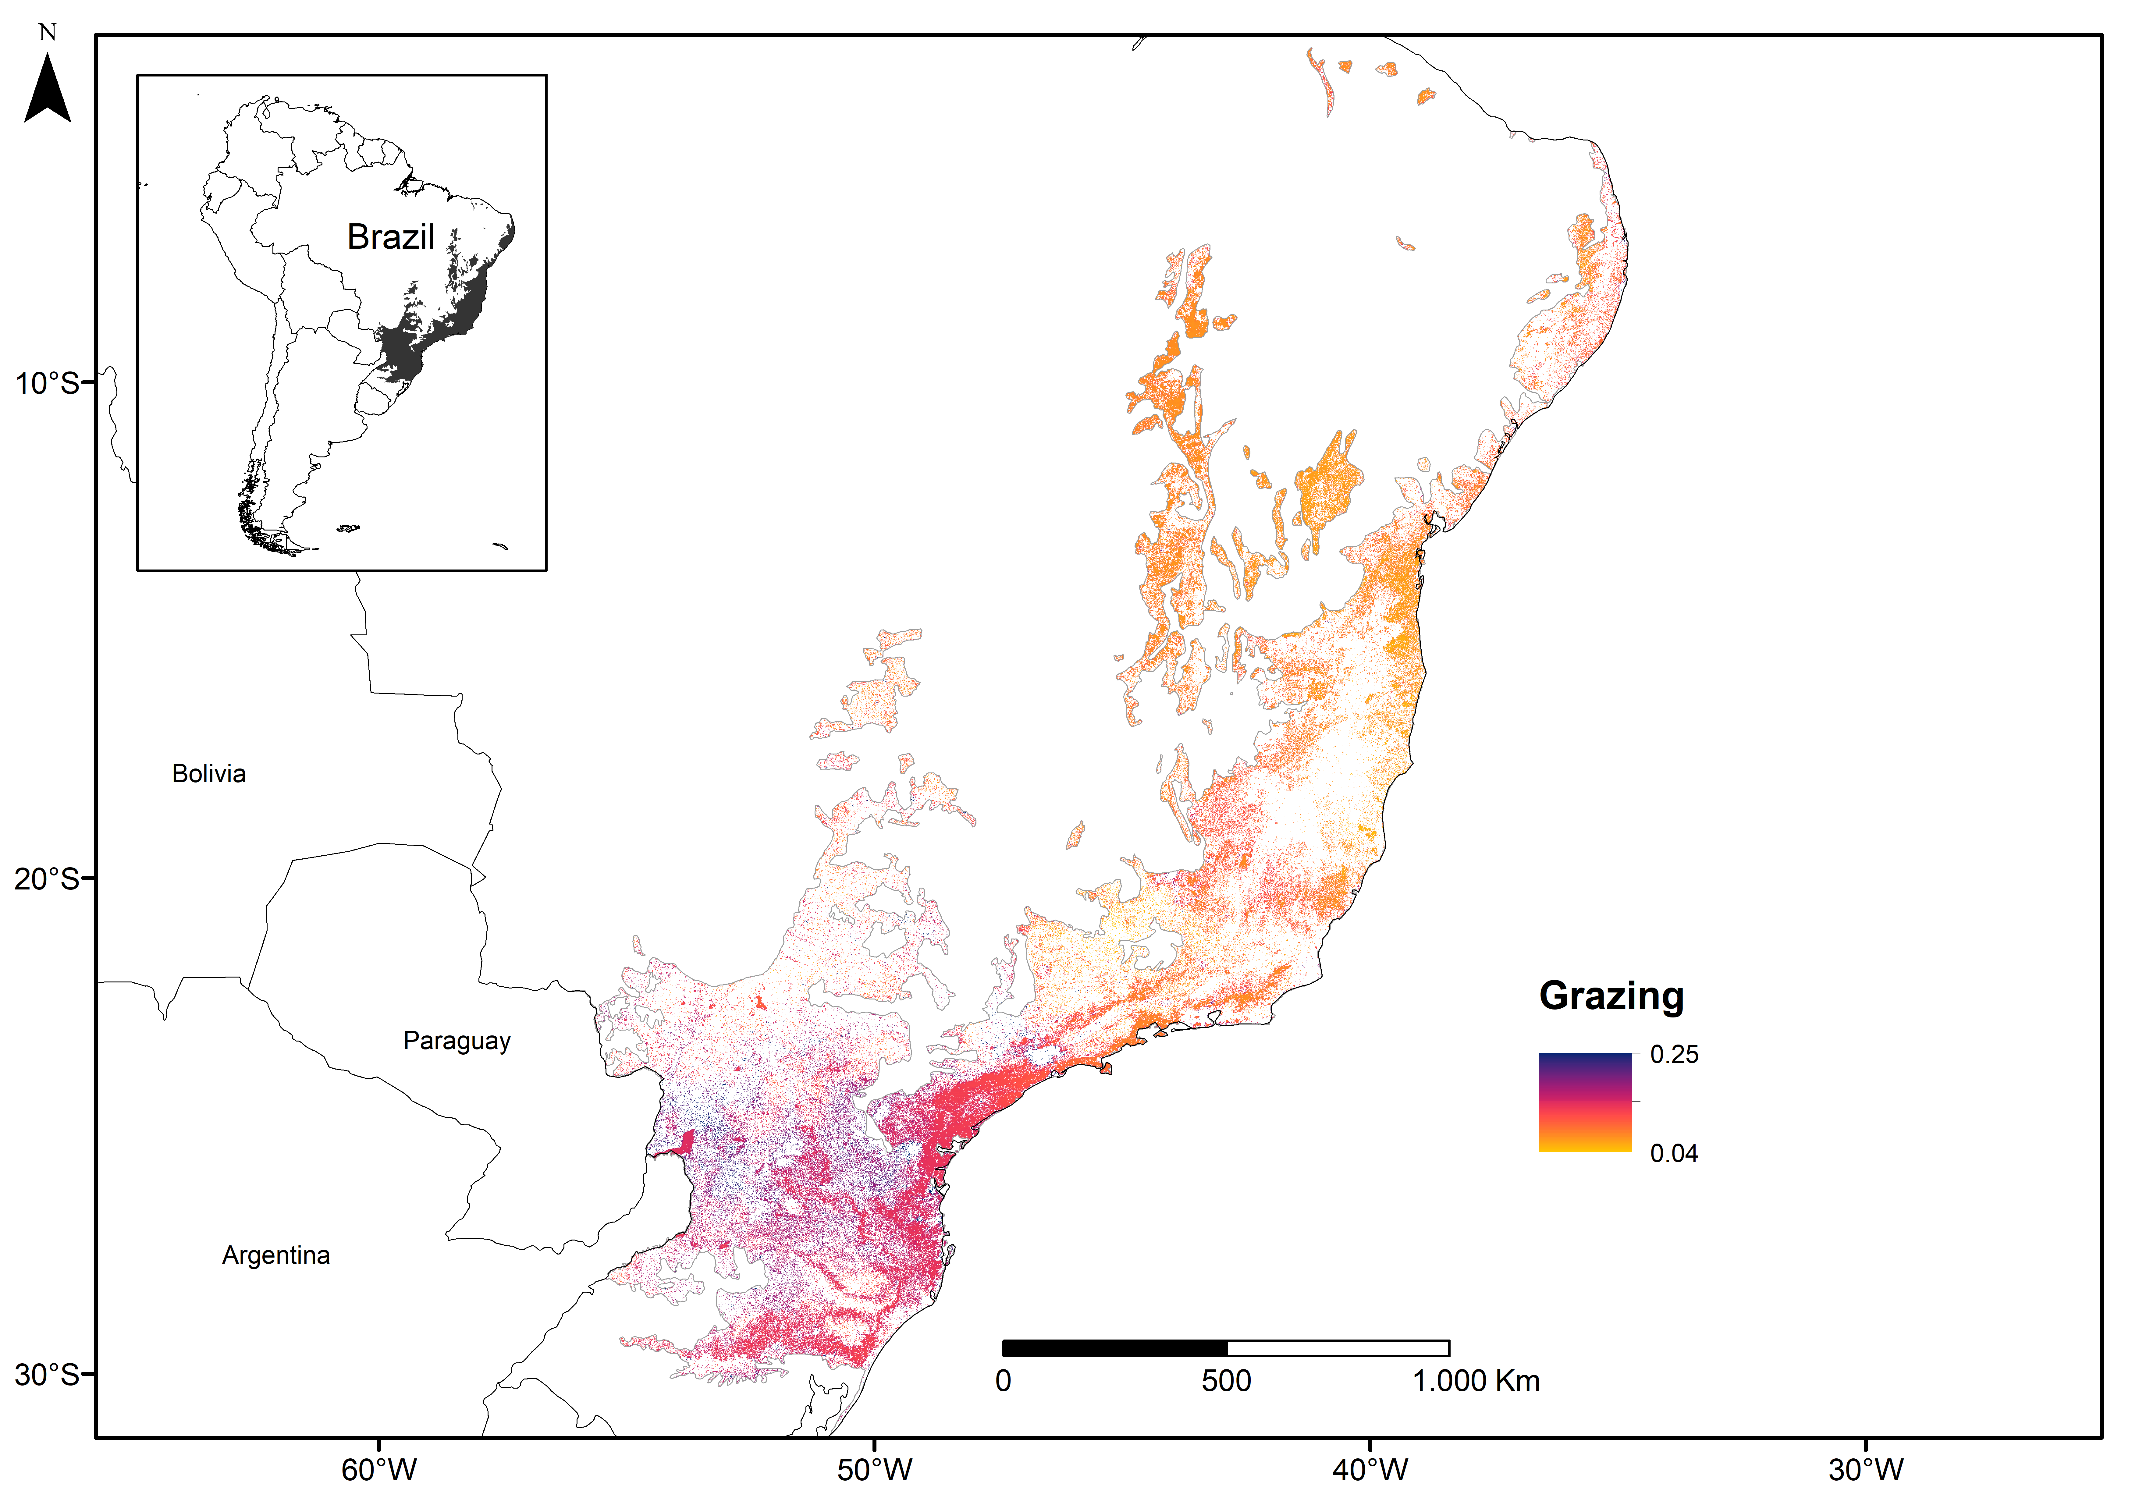


**Figure S24.** Predictions for the grazing function performed by assemblages of medium- and large-sized mammals of the Atlantic Forest, Brazil.


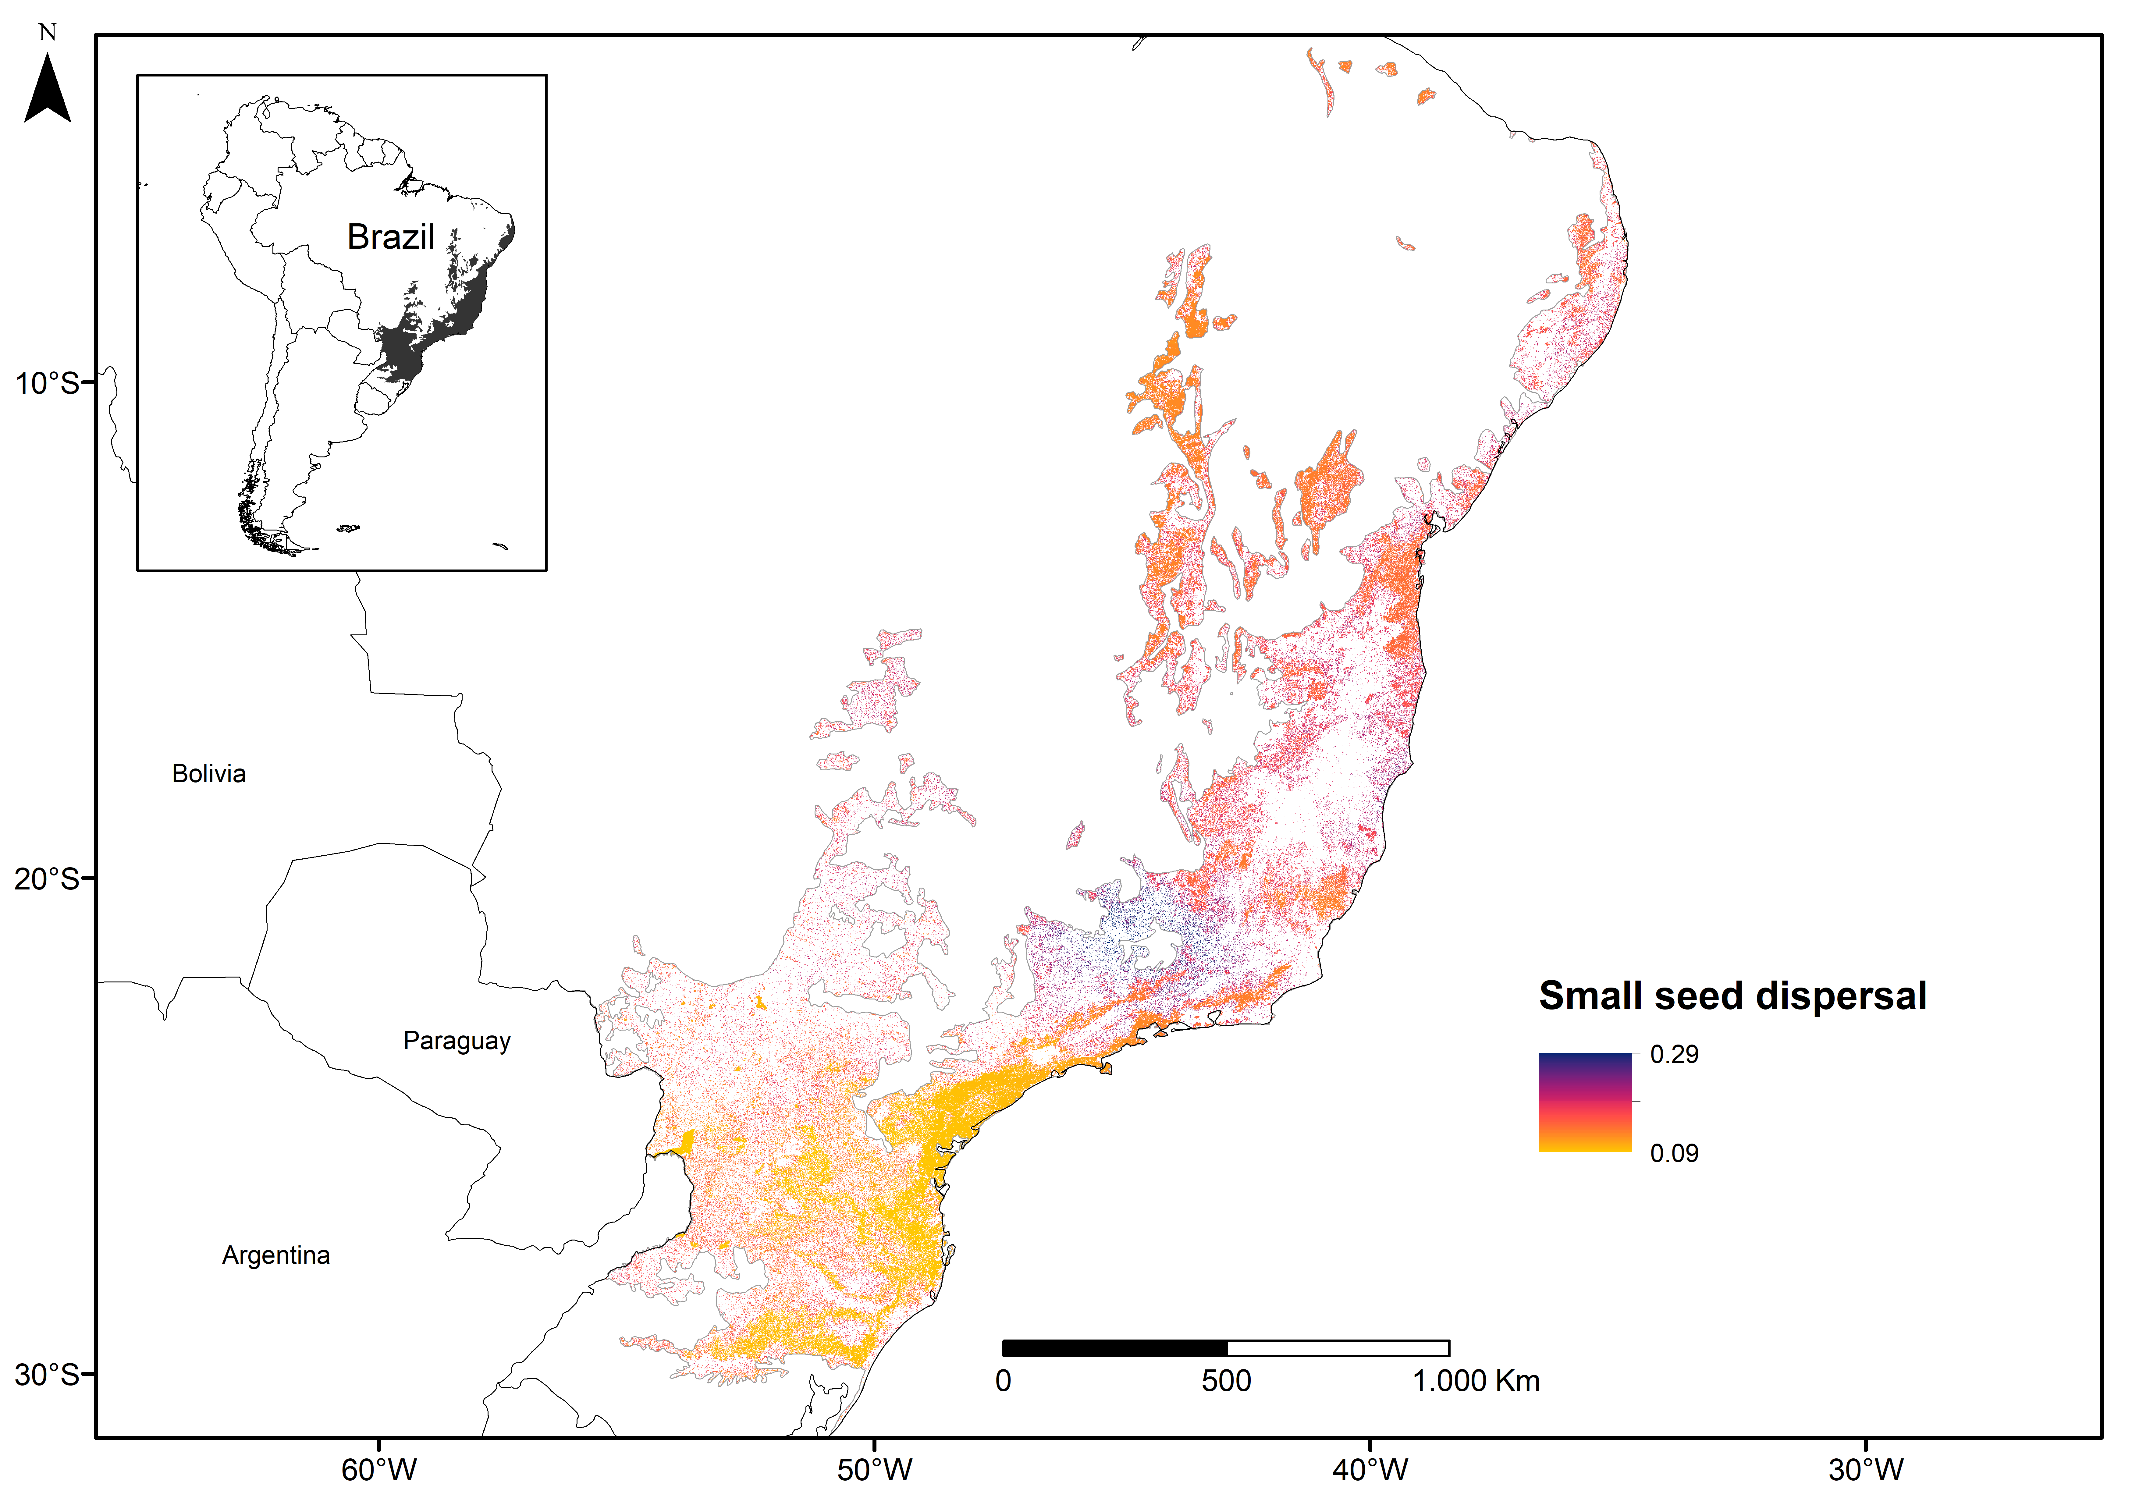


**Figure S25.** Predictions for small seed dispersal performed by assemblages of medium- and large-sized mammals of the Atlantic Forest, Brazil.


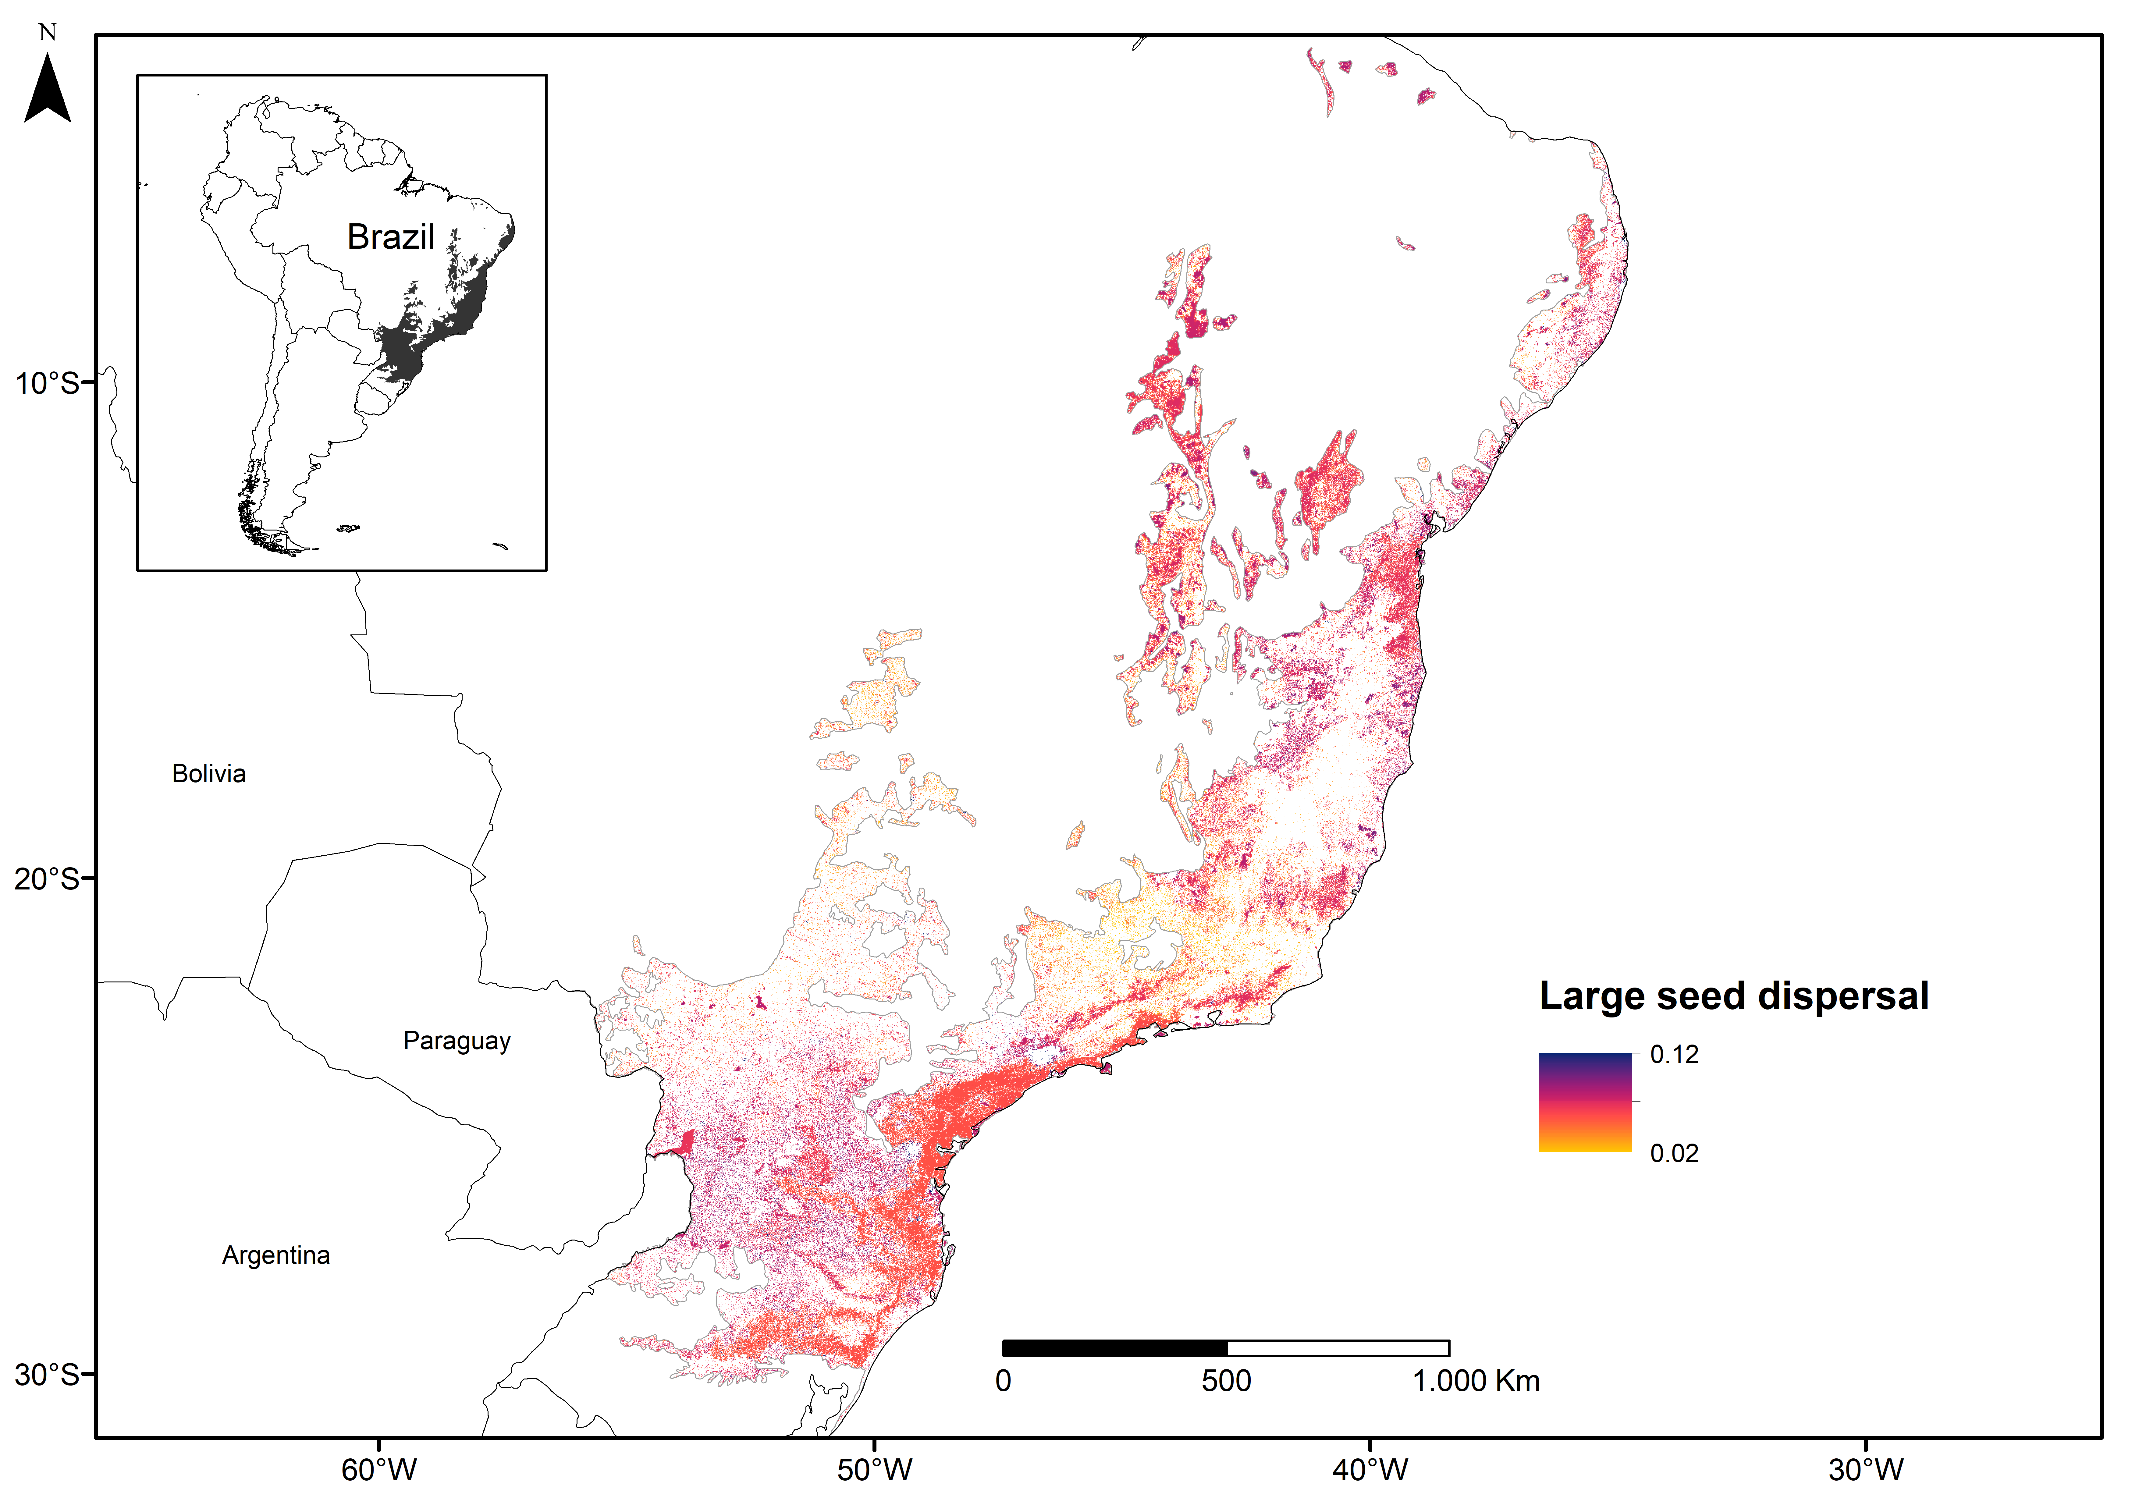


**Figure S26.** Predictions for large seed dispersal performed by assemblages of medium- and large-sized mammals of the Atlantic Forest, Brazil.


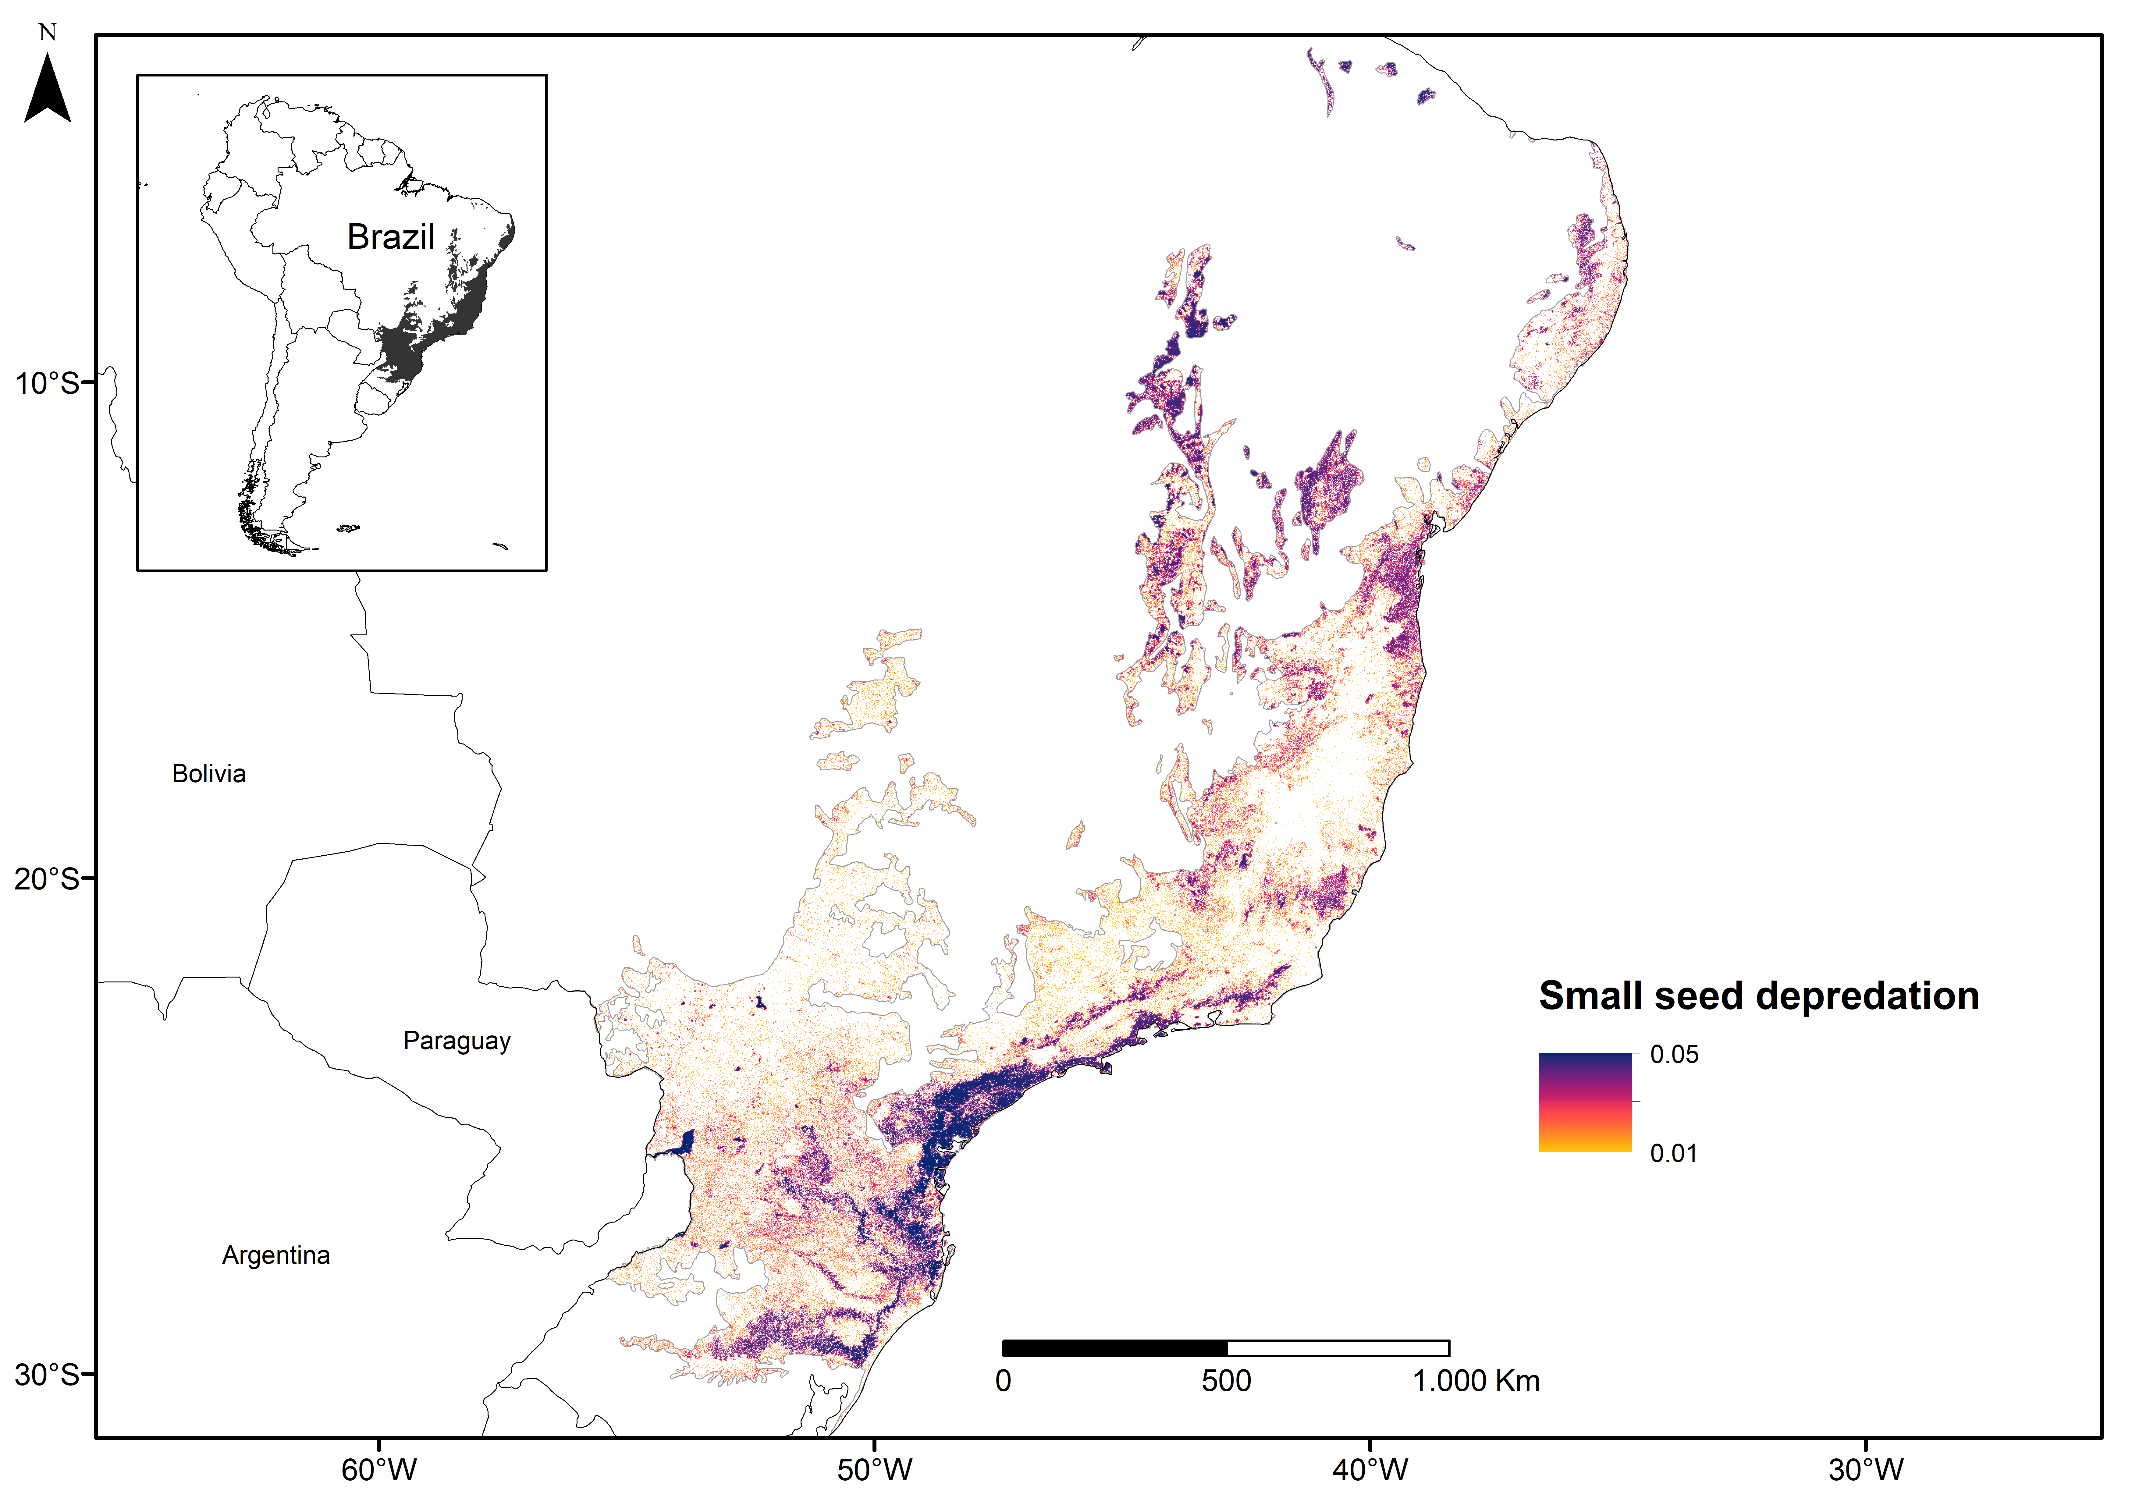


**Figure S27.** Predictions for small seed depredation performed by assemblages of medium- and large-sized mammals of the Atlantic Forest, Brazil.


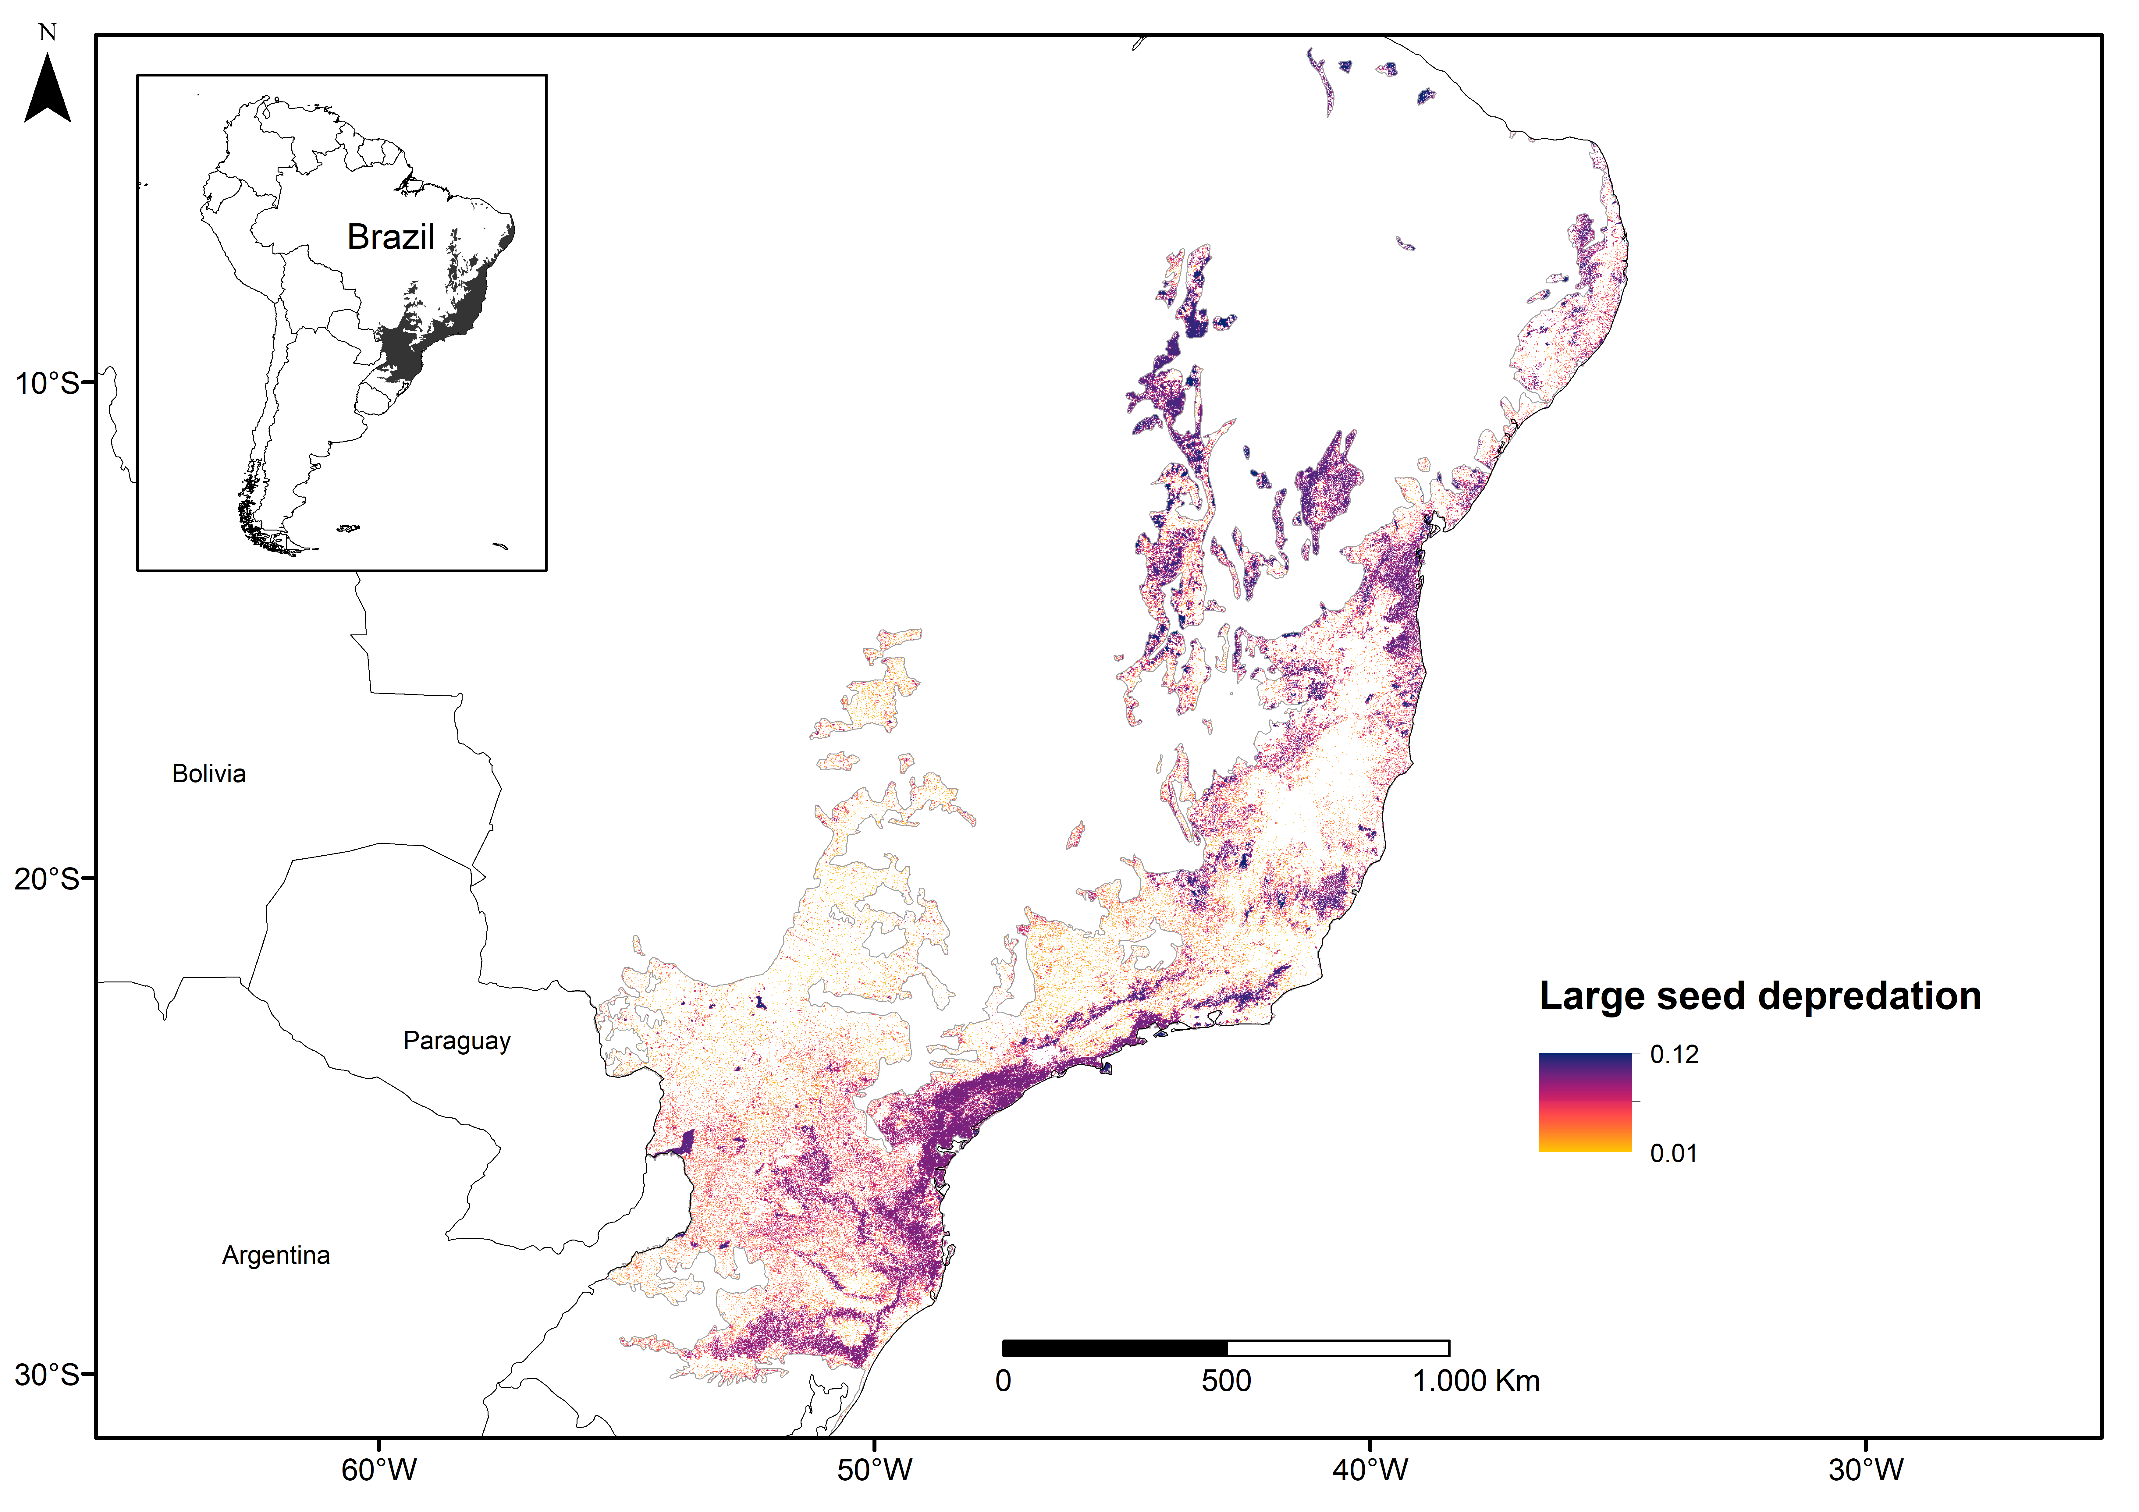


**Figure S28.** Predictions for large seed depredation performed by assemblages of medium- and large-sized mammals of the Atlantic Forest, Brazil.


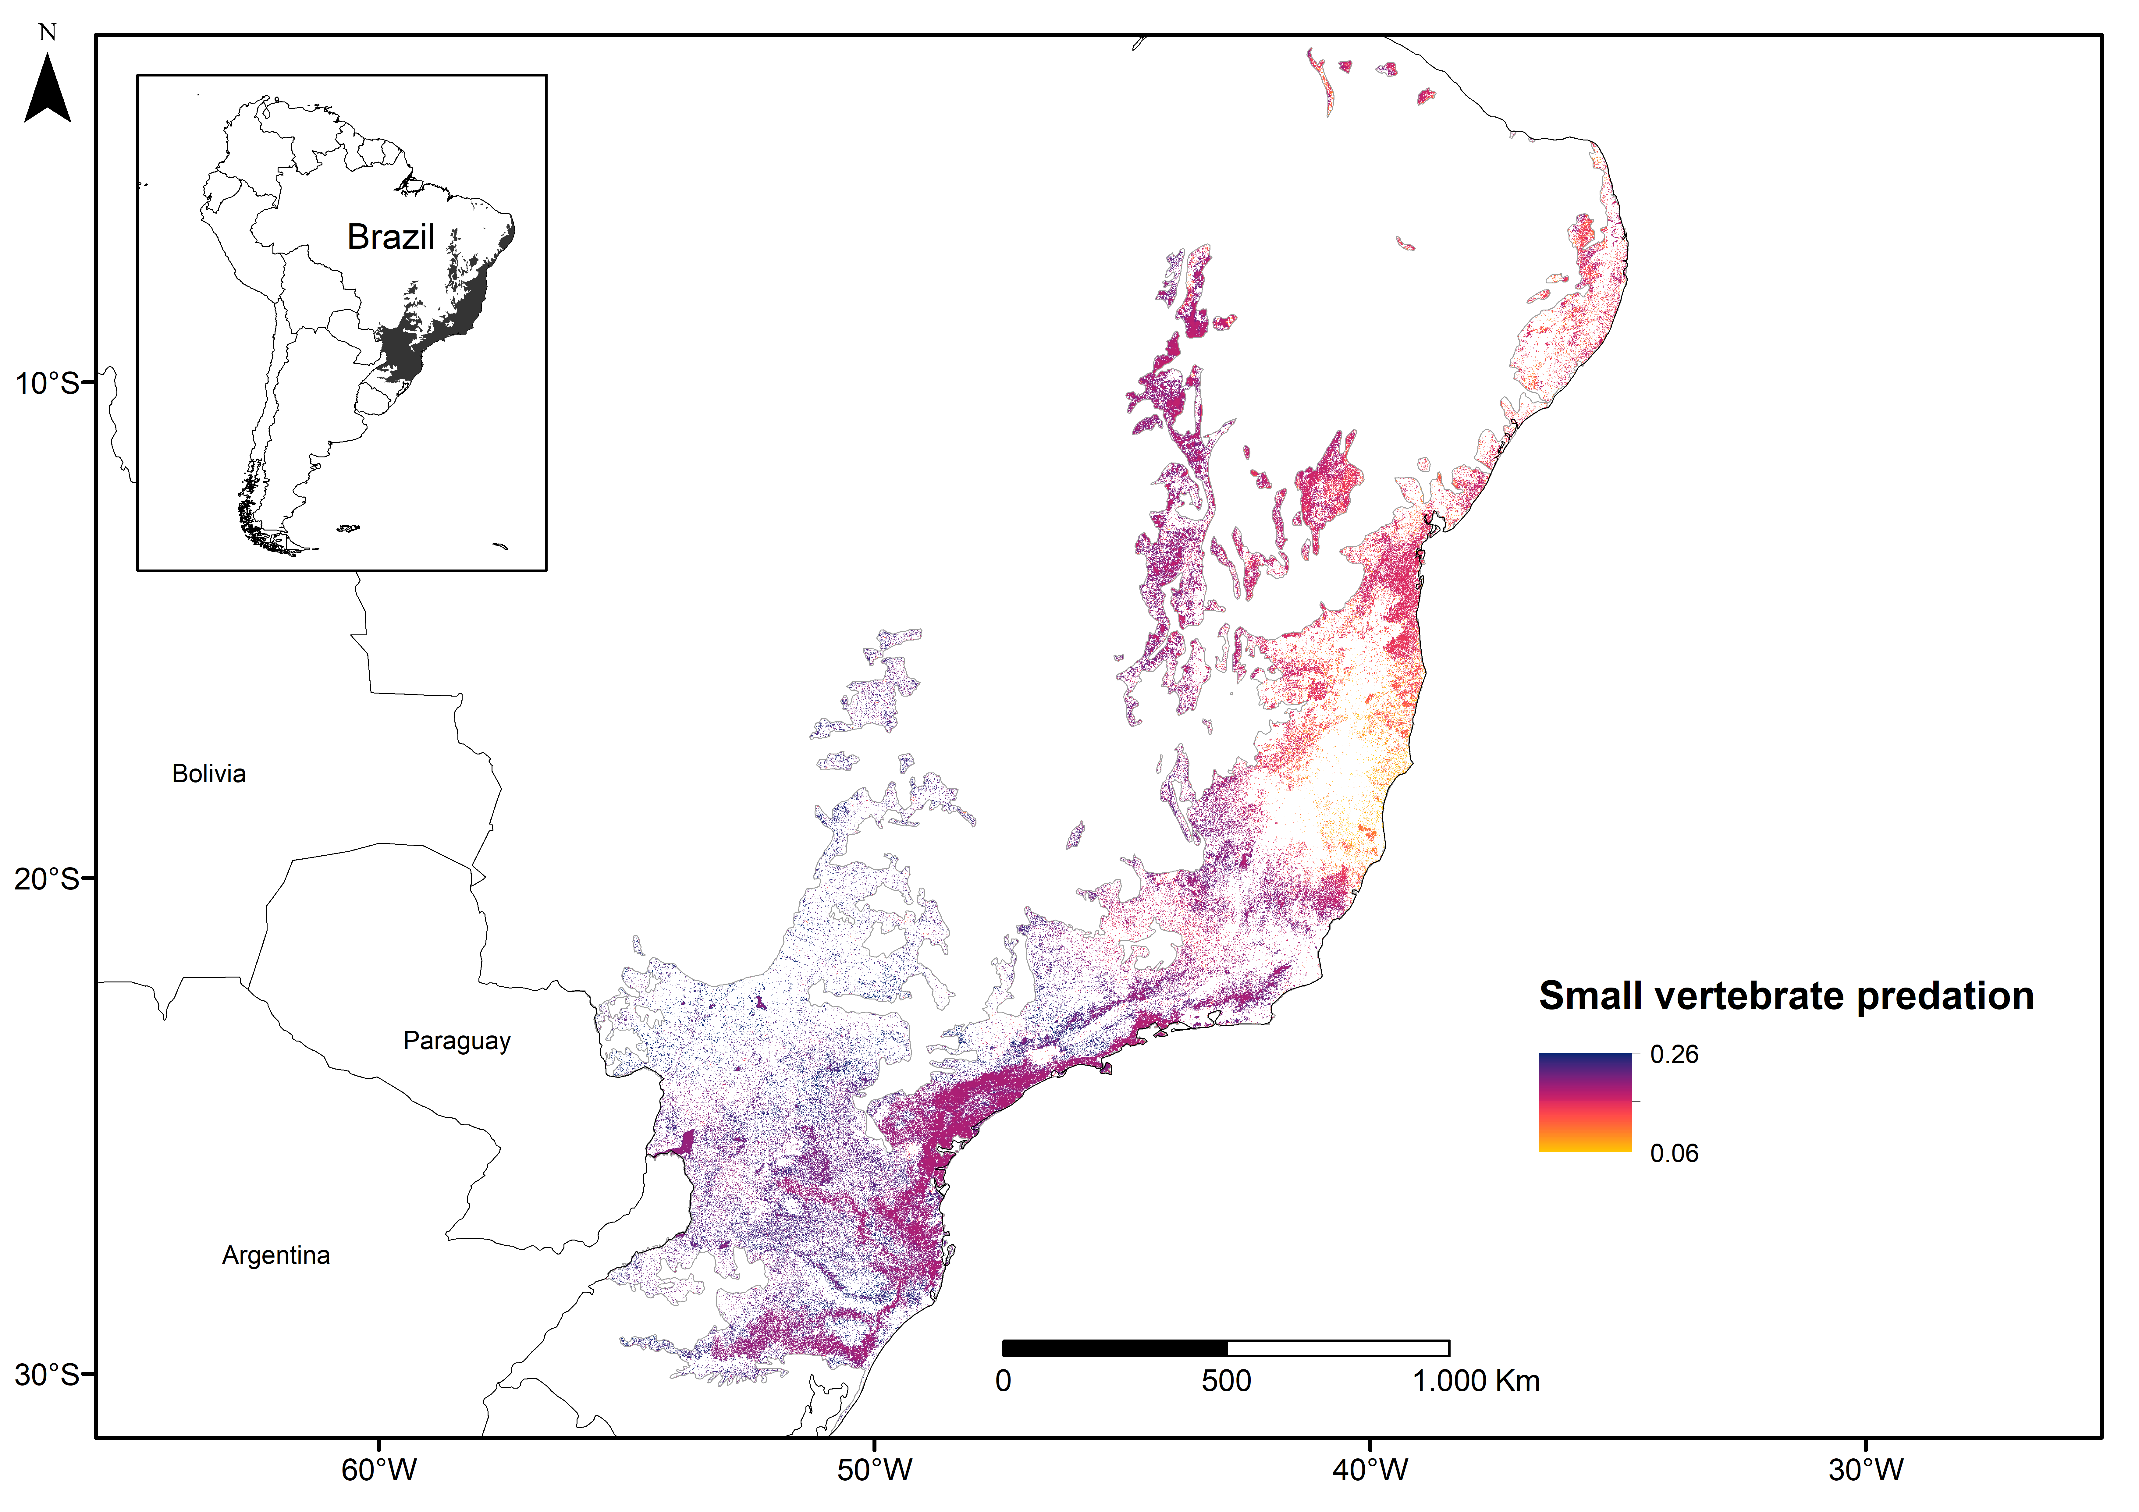


**Figure S29.** Predictions for small vertebrate predation performed by assemblages of medium- and large-sized mammals of the Atlantic Forest, Brazil.


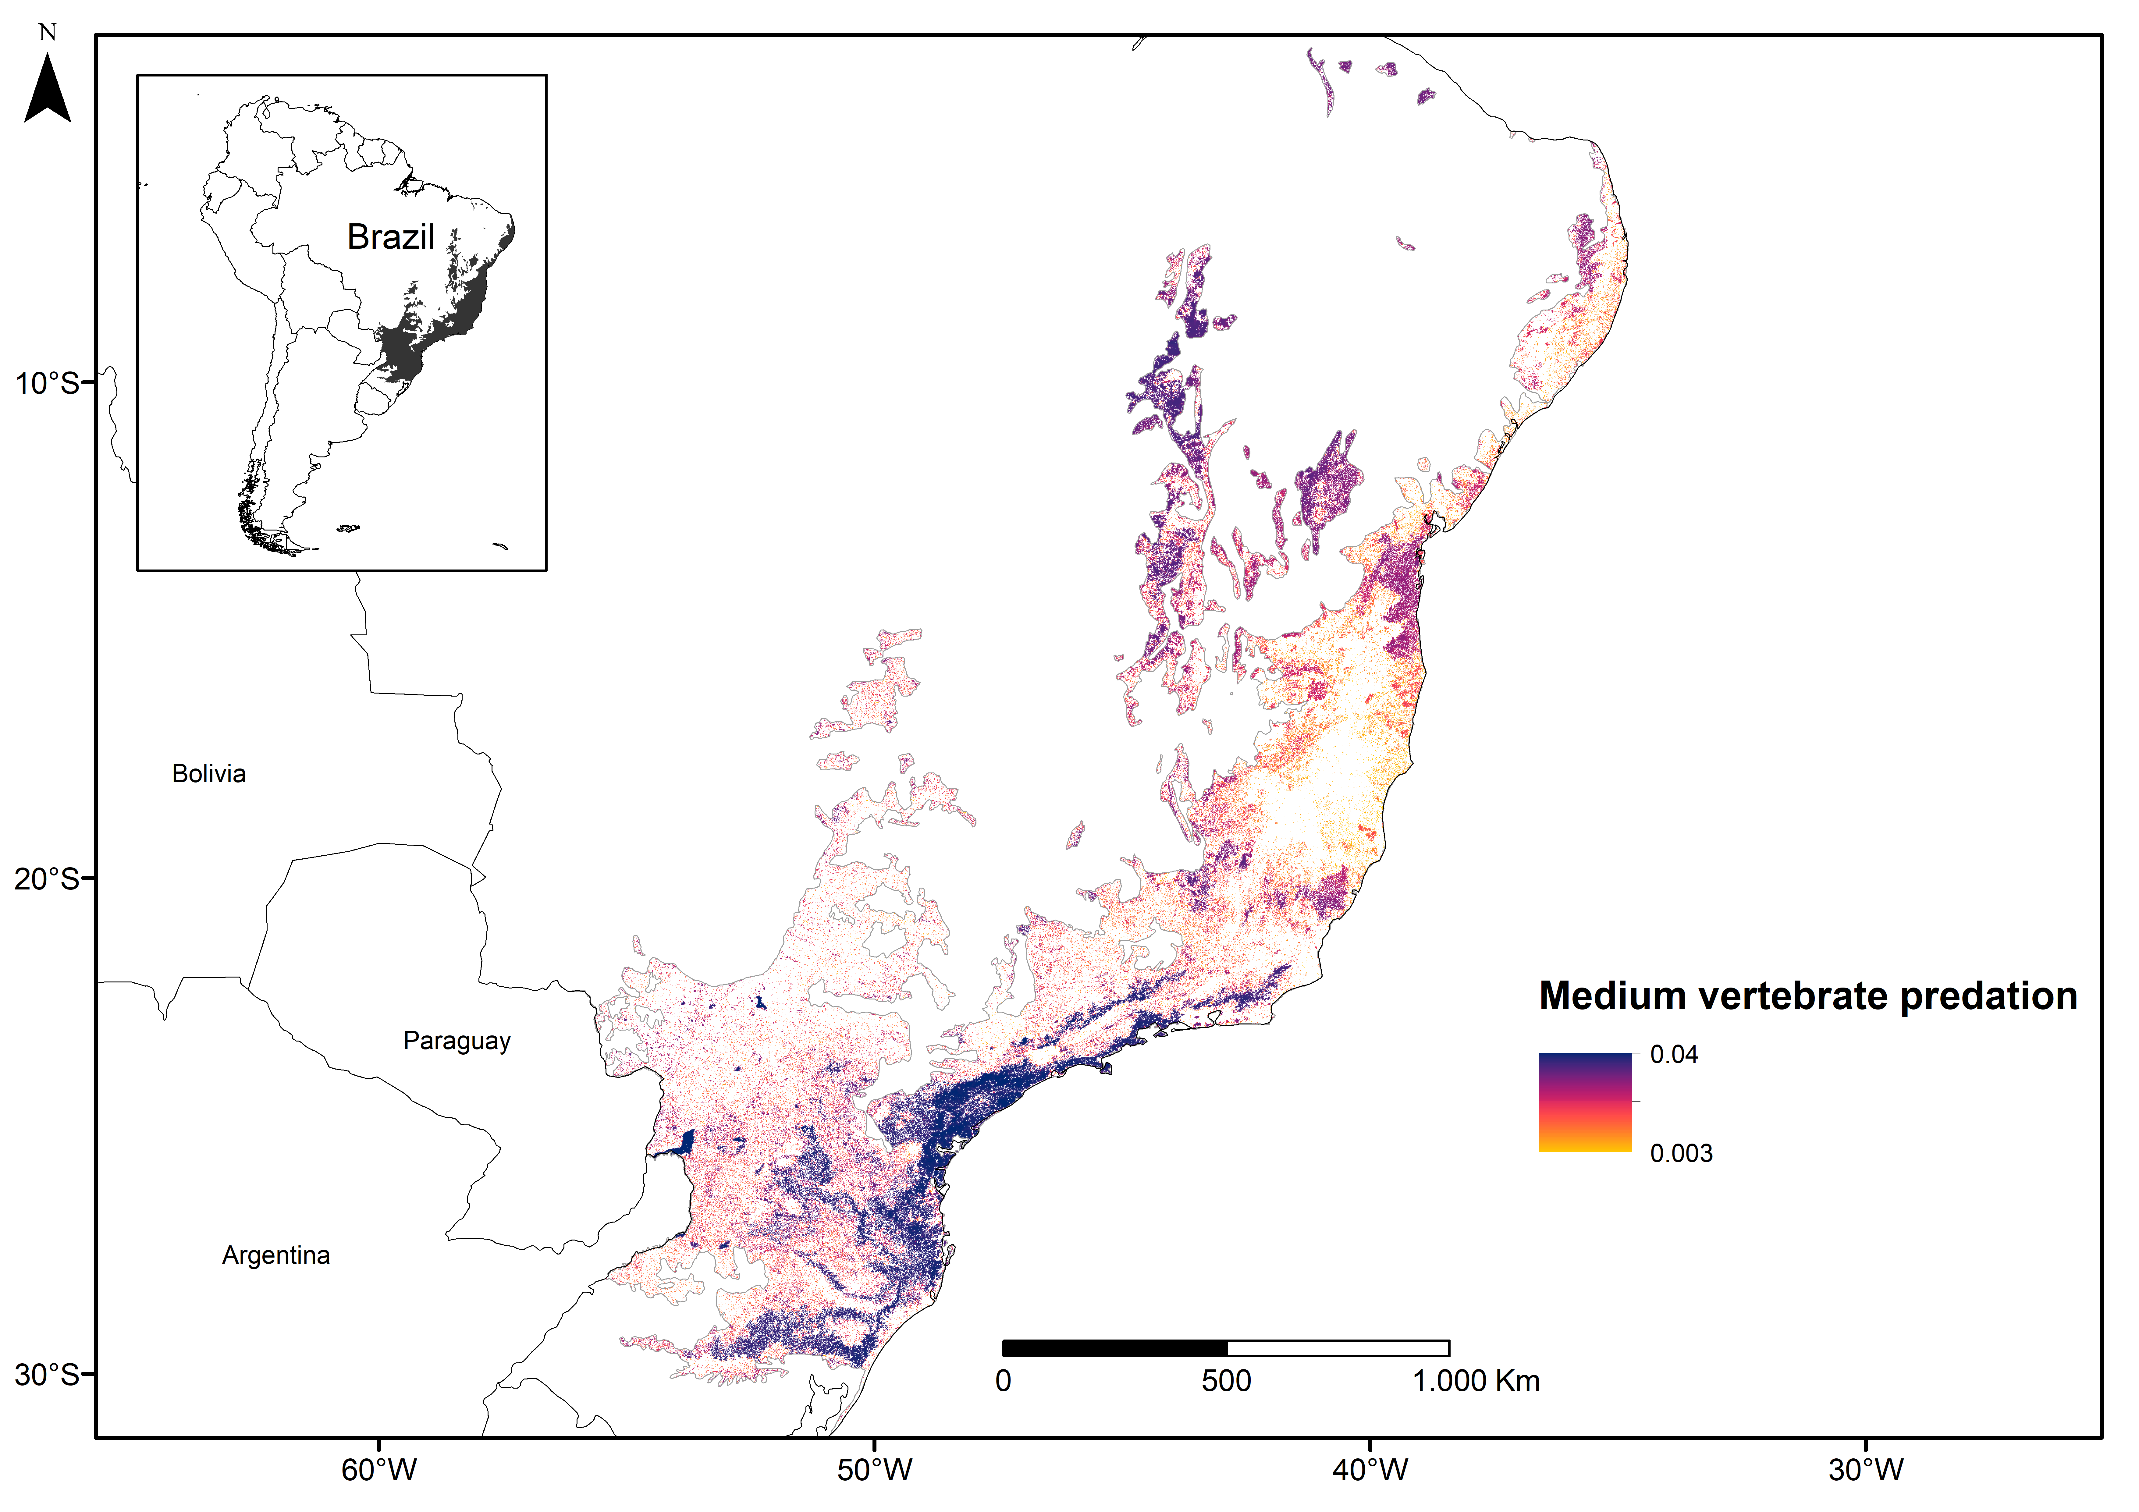


**Figure S30.** Predictions for medium vertebrate predation performed by assemblages of medium- and large-sized mammals of the Atlantic Forest, Brazil.


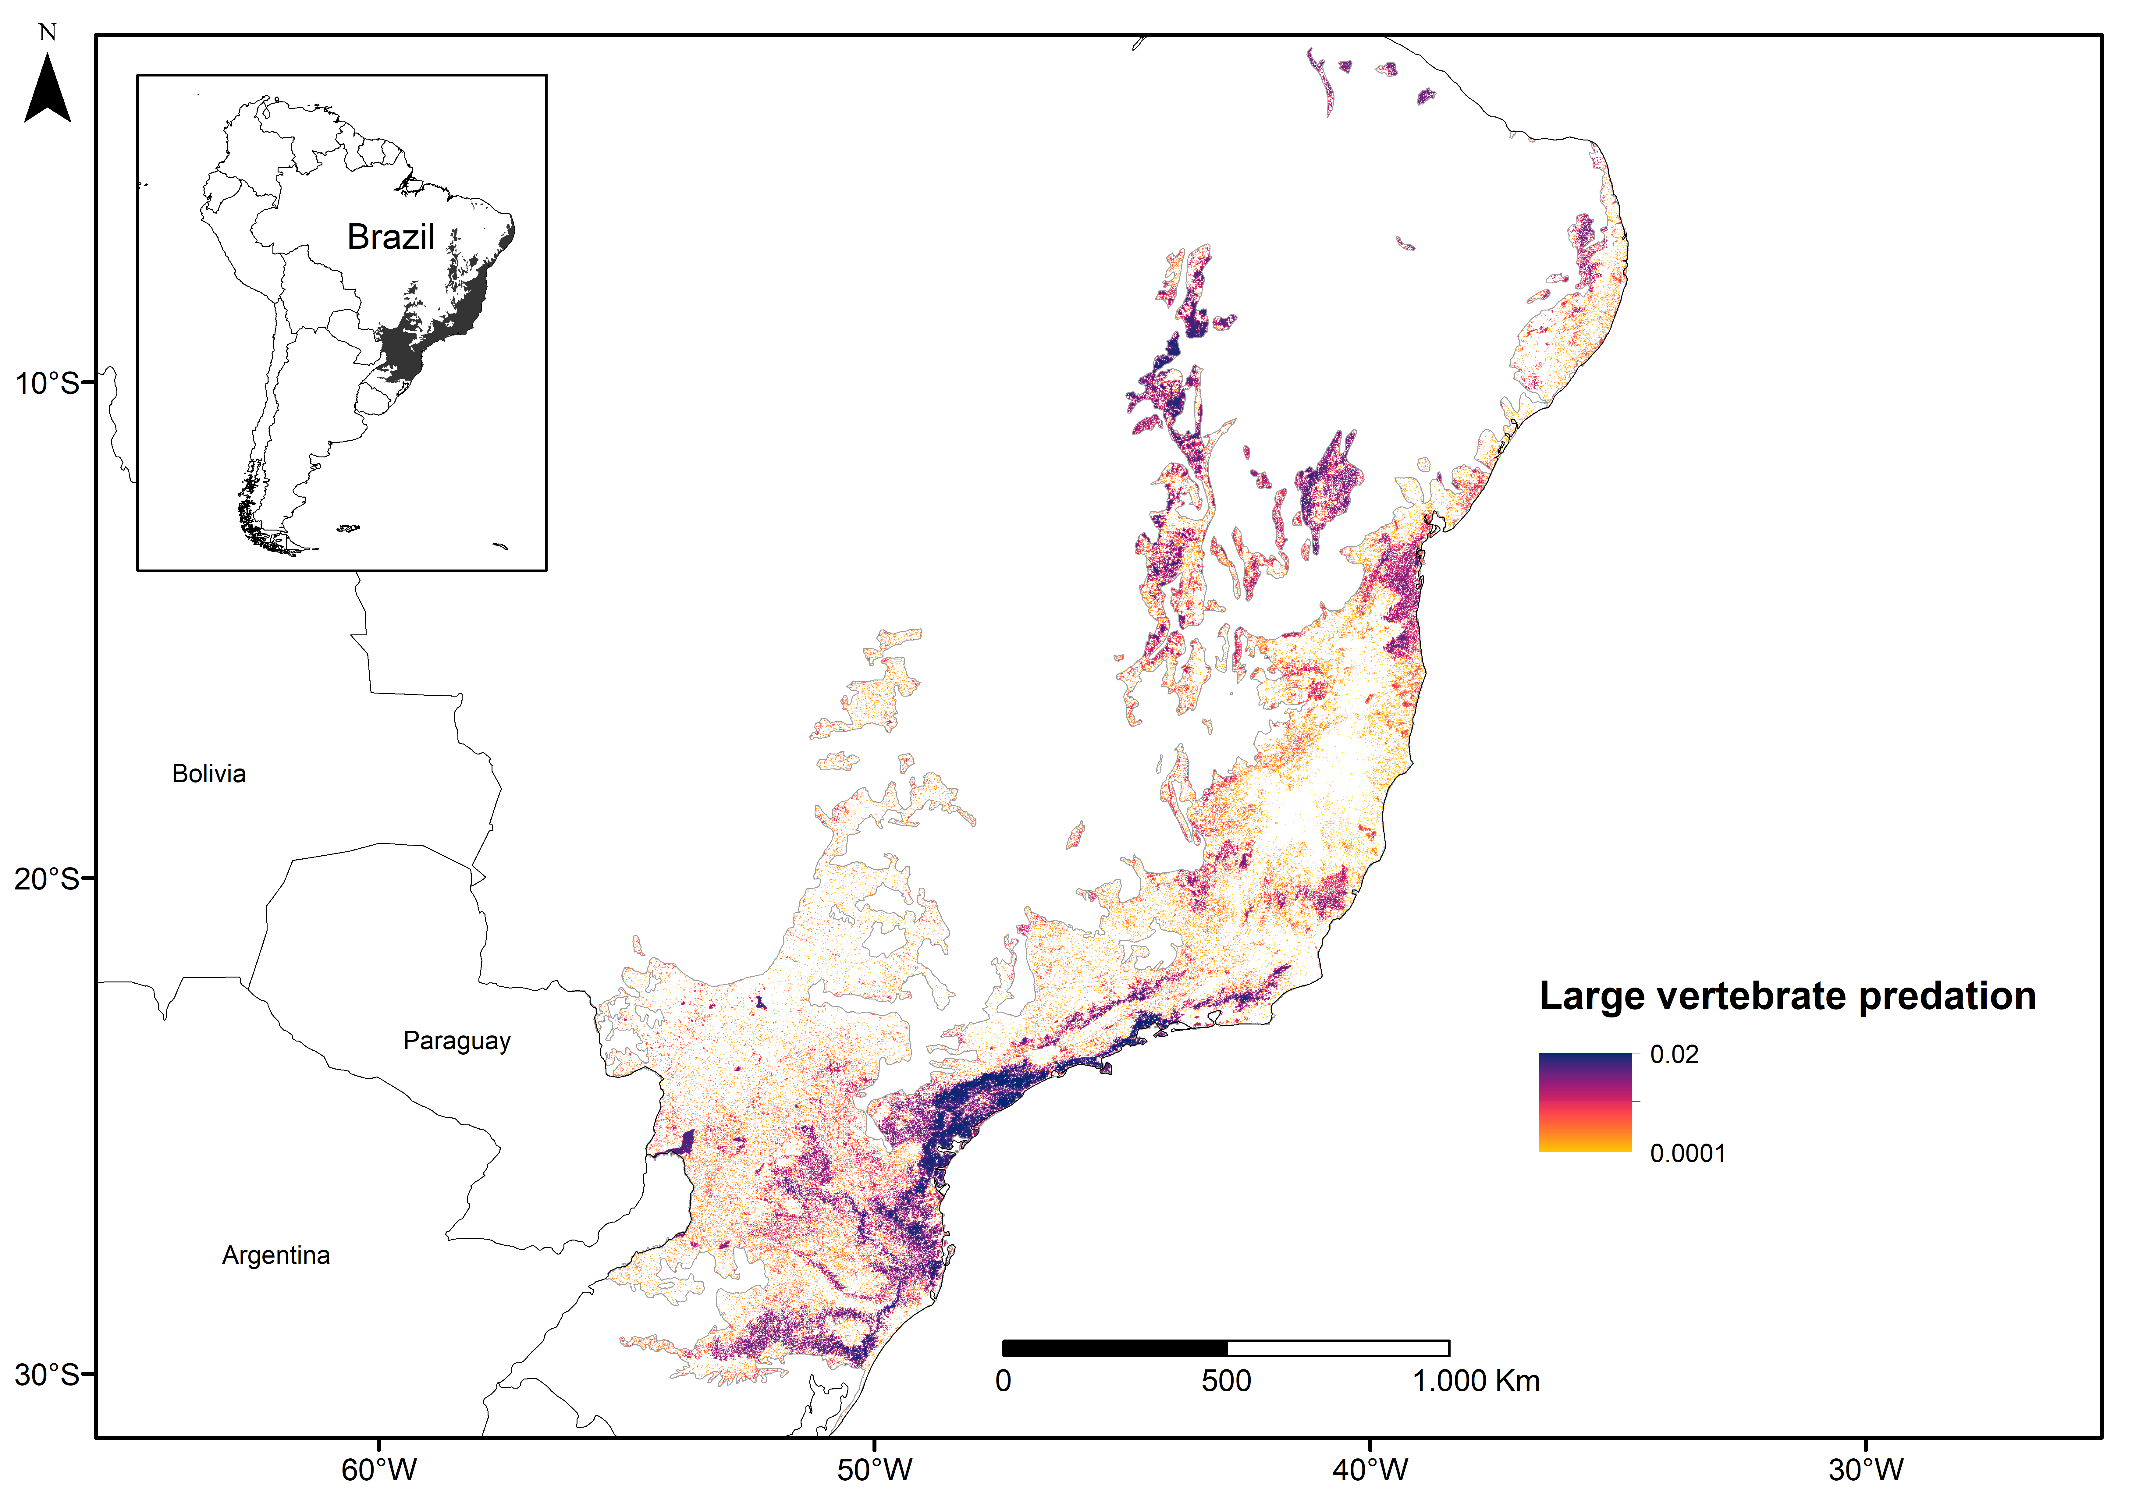


**Figure S31.** Predictions for large vertebrate predation performed by assemblages of medium- and large-sized mammals of the Atlantic Forest, Brazil.


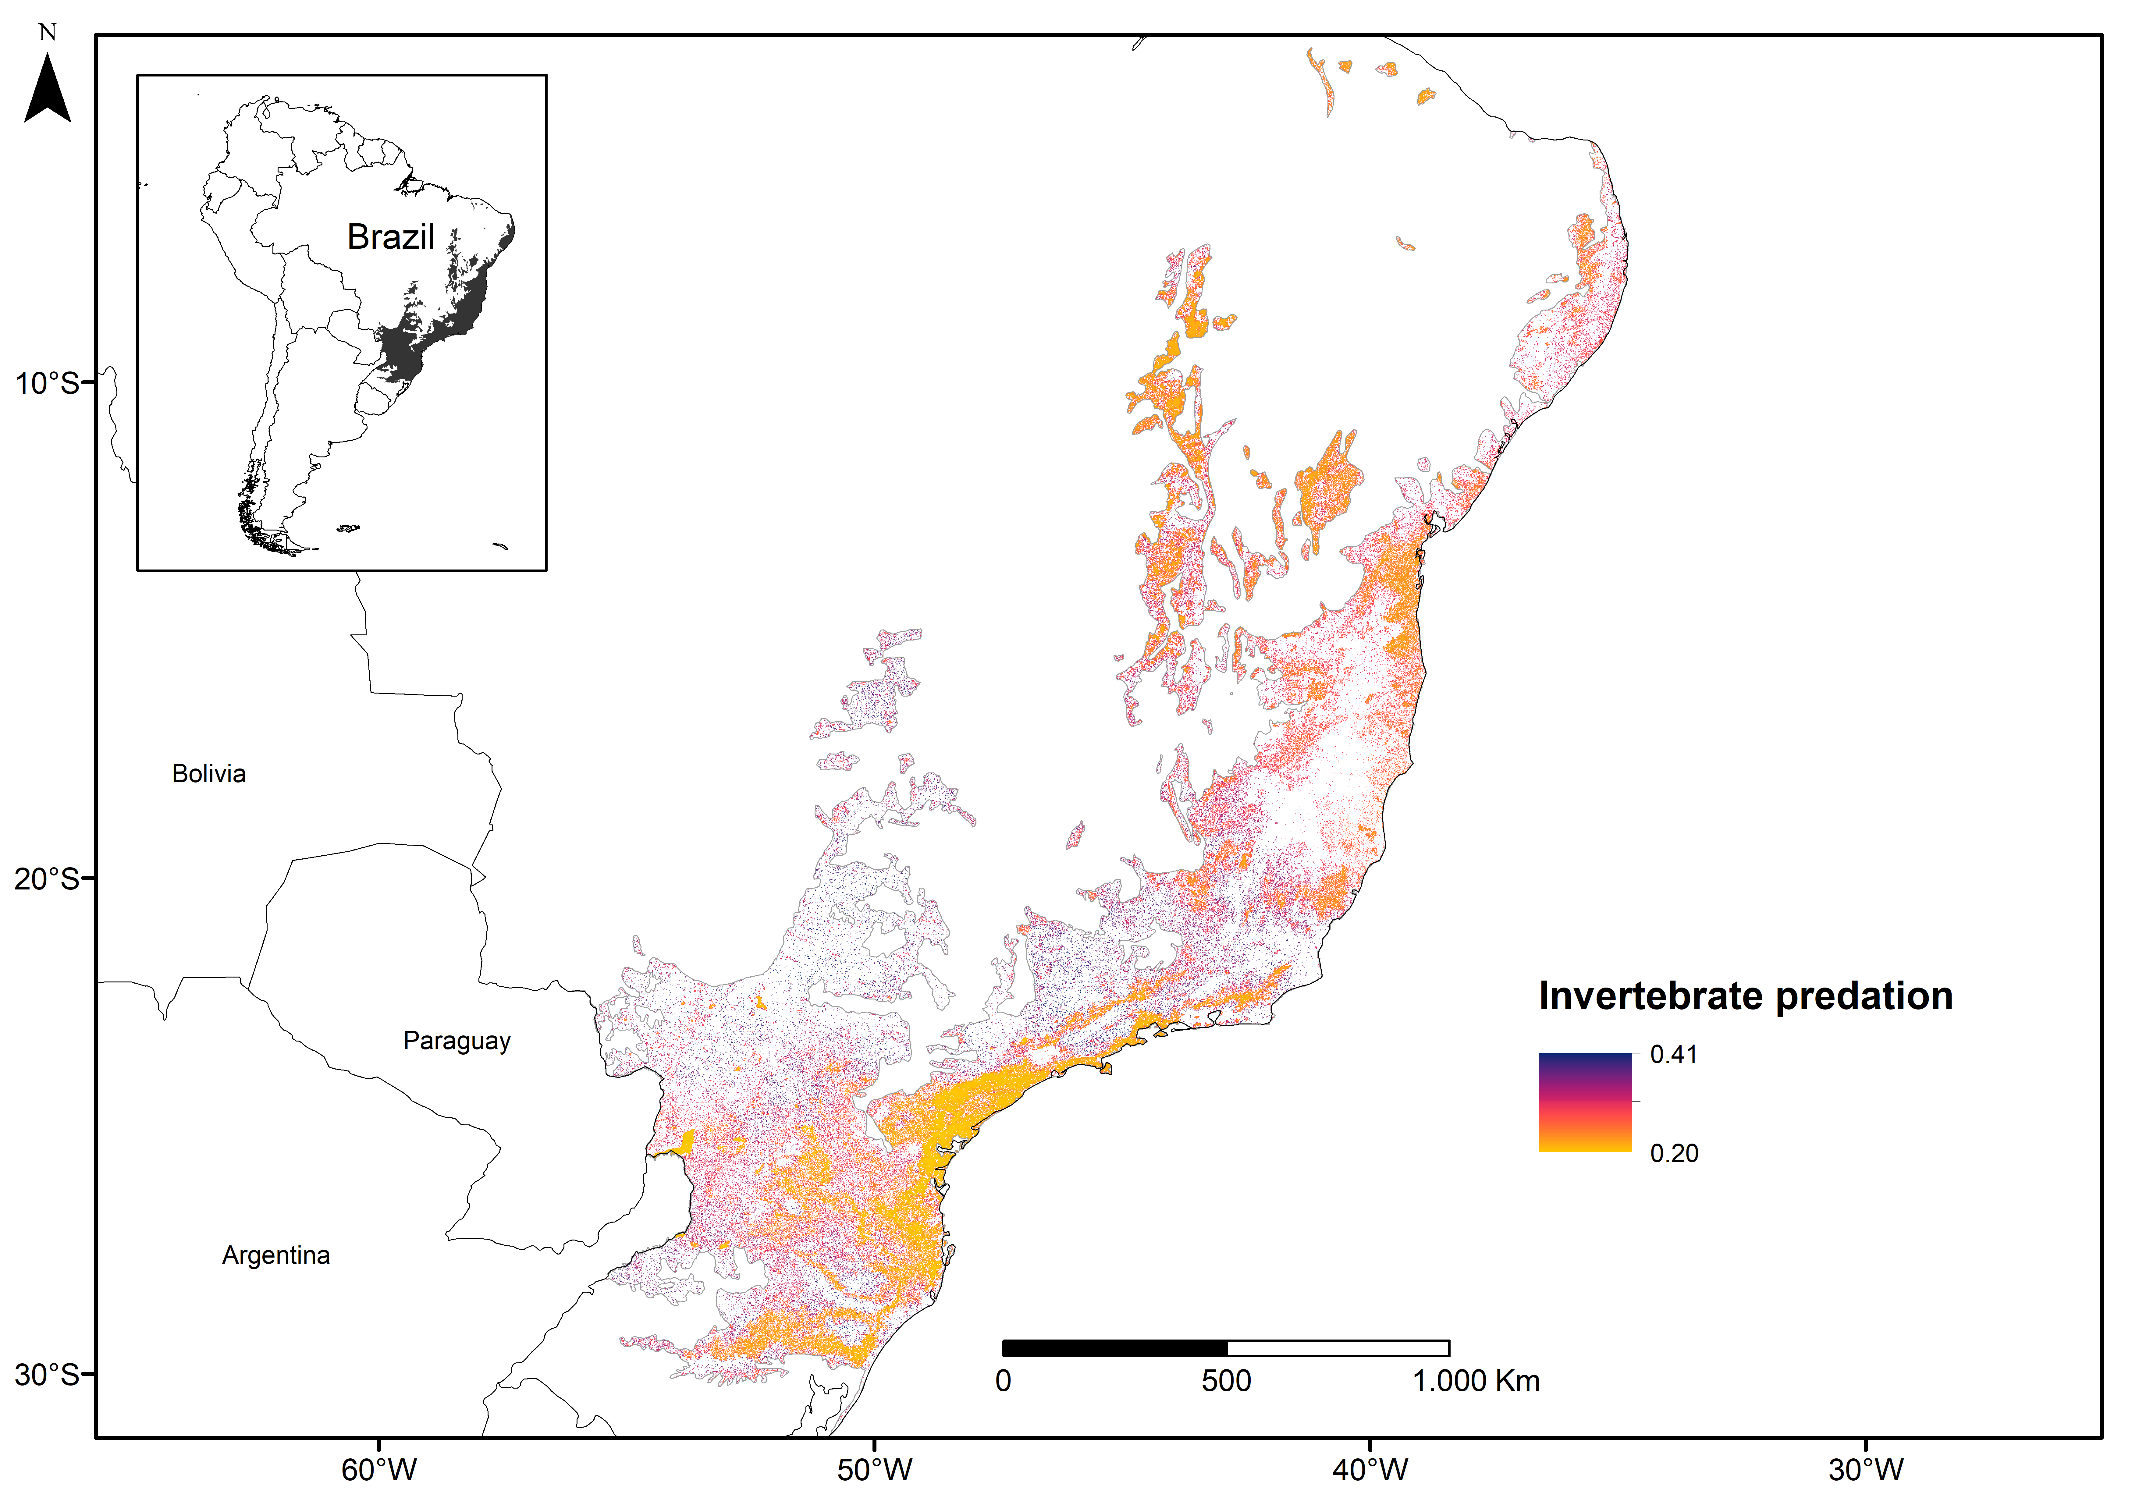


**Figure S32.** Predictions for invertebrate predation performed by assemblages of medium- and large-sized mammal of the Atlantic Forest, Brazil.
